# Supplementary material for: Time to death and its predictors among adult patients on mechanical ventilation admitted to intensive care units in West Amhara comprehensive specialized hospitals, Ethiopia: a retrospective follow-up study
Source: Springer Nature journal article supplement (doi:10.1186/s12871-024-02495-9), 2024-03-23
Supplement: MOESM2 [file 26898090]

| ID | Age | Gender | Residence | Dx                | GCS | ward       | dismission source | vasopressor | previous mv |
|----|-----|--------|-----------|-------------------|-----|------------|-------------------|-------------|-------------|
| 1  | 68  | female | Urban     | Neurological      | 15  | medical    | ward              | no          | no          |
| 2  | 68  | female | Urban     | Neurological      | 15  | medical    | ward              | no          | no          |
| 3  | 37  | female | Urban     | Respiratory       | 15  | medical    | emergency         | no          | no          |
| 4  | 18  | male   | Rural     | Tetanus           | 15  | medical    | ward              | no          | yes         |
| 5  | 27  | female | Urban     | Respiratory       | 15  | obstetrics | referred          | no          | no          |
| 6  | 22  | male   | Rural     | Neurological      | 4   | medical    | referred          | no          | no          |
| 7  | 55  | male   | Rural     | Neuromuscular     | 5   | Surgical   | emergency         | no          | no          |
| 8  | 30  | male   | Rural     | Gastro intestinal | 4   | Surgical   | operating room    | no          | no          |
| 9  | 58  | male   | Urban     | Tetanus           | 7   | medical    | emergency         | yes         | yes         |
| 10 | 62  | female | Rural     | Tetanus           | 15  | medical    | emergency         | yes         | yes         |
| 11 | 48  | male   | Urban     | Renal             | 15  | Surgical   | emergency         | no          | no          |
| 12 | 65  | male   | Rural     | Tetanus           | 15  | medical    | ward              | no          | no          |
| 13 | 27  | male   | Rural     | Renal             | 15  | medical    | ward              | no          | no          |
| 14 | 50  | female | Rural     | Neuromuscular     | 9   | medical    | ward              | yes         | no          |
| 15 | 54  | male   | Urban     | Neurological      | 3   | medical    | emergency         | no          | no          |
| 16 | 18  | male   | Rural     | Neurological      | 3   | medical    | emergency         | no          | no          |
| 17 | 19  | male   | Rural     | Respiratory       | 15  | medical    | emergency         | no          | no          |
| 18 | 42  | male   | Urban     | Respiratory       | 6   | medical    | emergency         | yes         | no          |
| 19 | 58  | female | Urban     | Tetanus           | 15  | medical    | ward              | no          | no          |
| 20 | 18  | female | Urban     | Respiratory       | 10  | medical    | emergency         | no          | no          |
| 21 | 23  | female | Rural     | Neurological      | 7   | medical    | ward              | no          | no          |
| 22 | 40  | male   | Rural     | Gastro intestinal | 15  | Surgical   | ward              | no          | no          |
| 23 | 26  | male   | Urban     | Accident          | 3   | Emergency  | emergency         | no          | no          |
| 24 | 35  | female | Rural     | Respiratory       | 8   | obstetrics | ward              | no          | no          |
| 25 | 32  | female | Rural     | Neurological      | 3   | obstetrics | emergency         | no          | no          |
| 26 | 23  | female | Rural     | Neurological      | 3   | medical    | emergency         | no          | no          |
| 27 | 46  | female | Rural     | Tetanus           | 13  | obstetrics | emergency         | no          | yes         |
| 28 | 60  | female | Rural     | Respiratory       | 15  | medical    | emergency         | no          | no          |
| 29 | 26  | female | Urban     | Tetanus           | 11  | obstetrics | emergency         | no          | no          |
| 30 | 28  | male   | Rural     | Accident          | 10  | Surgical   | ward              | yes         | yes         |
| 31 | 48  | female | Urban     | Respiratory       | 3   | medical    | ward              | yes         | no          |
| 32 | 40  | male   | Urban     | Cardiovascular    | 7   | medical    | emergency         | yes         | no          |
| 33 | 30  | female | Rural     | Other             | 15  | Surgical   | ward              | yes         | yes         |
| 34 | 30  | female | Rural     | Cardiovascular    | 7   | medical    | emergency         | yes         | no          |
| 35 | 38  | male   | Urban     | Tetanus           | 15  | medical    | emergency         | yes         | no          |
| 36 | 70  | male   | Rural     | Respiratory       | 15  | medical    | referred          | yes         | yes         |
| 37 | 33  | male   | Urban     | Neurological      | 4   | medical    | referred          | no          | no          |
| 38 | 70  | male   | Rural     | Gastro intestinal | 9   | Surgical   | ward              | no          | no          |
| 39 | 18  | male   | Rural     | Accident          | 7   | Emergency  | emergency         | no          | no          |
| 40 | 52  | male   | Rural     | Respiratory       | 10  | medical    | referred          | no          | no          |
| 41 | 22  | male   | Rural     | Accident          | 3   | Emergency  | emergency         | no          | no          |
| 42 | 55  | male   | Rural     | Respiratory       | 15  | medical    | emergency         | no          | no          |
| 43 | 27  | male   | Rural     | Neurological      | 3   | medical    | emergency         | no          | no          |
| 44 | 23  | male   | Rural     | Neurological      | 15  | medical    | ward              | no          | no          |
| 45 | 30  | female | Urban     | Respiratory       | 15  | medical    | emergency         | no          | no          |
| 46 | 61  | male   | Urban     | Respiratory       | 15  | medical    | emergency         | no          | no          |

|    |    |        |       |                  |    |             |                |     |     |
|----|----|--------|-------|------------------|----|-------------|----------------|-----|-----|
| 47 | 38 | female | Urban | Respiratory      | 15 | medical     | ward           | no  | no  |
| 48 | 25 | female | Rural | Respiratory      | 12 | medical     | reffered       | no  | no  |
| 49 | 32 | female | Rural | Neurological     | 3  | medical     | emergency      | yes | no  |
| 50 | 37 | male   | Rural | Neurological     | 3  | medical     | emergency      | yes | no  |
| 51 | 52 | female | Urban | Accident         | 15 | medical     | reffered       | no  | yes |
| 52 | 20 | male   | Rural | Accident         | 5  | Surgical    | reffered       | no  | yes |
| 53 | 30 | male   | Rural | Accident         | 4  | medical     | emergency      | yes | no  |
| 54 | 18 | male   | Urban | Accident         | 8  | medical     | emergency      | no  | no  |
| 55 | 20 | male   | Rural | Respiratory      | 15 | medical     | emergency      | no  | no  |
| 56 | 19 | male   | Rural | Other            | 4  | medical     | reffered       | no  | no  |
| 57 | 52 | female | Urban | Cardiovascular   | 13 | medical     | emergency      | no  | no  |
| 58 | 30 | female | Rural | Respiratory      | 15 | medical     | reffered       | no  | no  |
| 59 | 26 | male   | Rural | Gastro intestina | 15 | Surgical    | ward           | no  | no  |
| 60 | 30 | female | Rural | Other            | 15 | medical     | reffered       | no  | no  |
| 61 | 92 | male   | Urban | Respiratory      | 15 | medical     | emergency      | no  | no  |
| 62 | 33 | male   | Urban | Respiratory      | 15 | medical     | ward           | no  | no  |
| 63 | 47 | female | Rural | Respiratory      | 3  | medical     | emergency      | no  | no  |
| 64 | 23 | female | Urban | Respiratory      | 6  | medical     | reffered       | no  | no  |
| 65 | 50 | female | Urban | Gastro intestina | 5  | medical     | reffered       | no  | no  |
| 66 | 35 | female | Urban | Respiratory      | 12 | medical     | reffered       | yes | no  |
| 67 | 25 | male   | Urban | Respiratory      | 3  | medical     | emergency      | yes | no  |
| 68 | 18 | female | Urban | Cardiovascular   | 5  | medical     | ward           | yes | no  |
| 69 | 35 | male   | Urban | Accident         | 6  | medical     | reffered       | no  | no  |
| 70 | 18 | male   | Rural | Gastro intestina | 3  | medical     | emergency      | no  | no  |
| 71 | 55 | male   | Rural | Respiratory      | 7  | medical     | ward           | no  | no  |
| 72 | 60 | female | Urban | Cardiovascular   | 14 | medical     | ward           | no  | no  |
| 73 | 68 | female | Rural | Cardiovascular   | 10 | medical     | emergency      | yes | no  |
| 74 | 30 | male   | Rural | Respiratory      | 14 | Surgical    | operating room | no  | no  |
| 75 | 68 | female | Rural | Neurological     | 3  | medical     | emergency      | no  | yes |
| 76 | 40 | male   | Rural | Gastro intestina | 5  | Surgical    | emergency      | no  | no  |
| 77 | 54 | male   | Urban | Respiratory      | 15 | medical     | reffered       | no  | no  |
| 78 | 23 | male   | Rural | Other            | 3  | medical     | reffered       | no  | no  |
| 79 | 30 | female | Rural | Hematologic      | 15 | medical     | ward           | no  | no  |
| 80 | 72 | male   | Urban | Respiratory      | 15 | medical     | reffered       | yes | no  |
| 81 | 24 | male   | Urban | Respiratory      | 15 | medical     | ward           | yes | no  |
| 82 | 29 | female | Rural | Respiratory      | 5  | obstestrics | reffered       | yes | no  |
| 83 | 54 | female | Rural | Neurological     | 5  | medical     | reffered       | yes | yes |
| 84 | 70 | male   | Rural | Respiratory      | 6  | medical     | reffered       | yes | yes |
| 85 | 37 | male   | Urban | Gastro intestina | 10 | Surgical    | reffered       | no  | no  |
| 86 | 39 | female | Urban | Respiratory      | 15 | medical     | emergency      | no  | no  |
| 87 | 51 | female | Rural | Other            | 3  | medical     | reffered       | no  | no  |
| 88 | 55 | male   | Rural | Respiratory      | 15 | medical     | ward           | no  | no  |
| 89 | 66 | male   | Rural | Cardiovascular   | 6  | Surgical    | operating room | no  | no  |
| 90 | 26 | female | Rural | Cardiovascular   | 8  | obstestrics | reffered       | no  | no  |
| 91 | 26 | male   | Rural | Neurological     | 3  | medical     | ward           | no  | no  |
| 92 | 24 | female | Rural | Cardiovascular   | 14 | medical     | emergency      | no  | no  |
| 93 | 28 | male   | Urban | Accident         | 6  | Emergency   | emergency      | no  | no  |

|     |    |        |       |                  |    |            |                |     |     |
|-----|----|--------|-------|------------------|----|------------|----------------|-----|-----|
| 94  | 35 | female | Rural | Respiratory      | 14 | obstetrics | ward           | no  | no  |
| 95  | 32 | male   | Rural | Accident         | 15 | Surgical   | ward           | no  | no  |
| 96  | 72 | male   | Rural | Respiratory      | 15 | medical    | ward           | no  | no  |
| 97  | 25 | female | Rural | Neurological     | 4  | obstetrics | referred       | no  | no  |
| 98  | 42 | male   | Urban | Respiratory      | 15 | medical    | ward           | no  | no  |
| 99  | 35 | female | Rural | Respiratory      | 15 | medical    | emergency      | no  | no  |
| 100 | 45 | female | Urban | Cardiovascular   | 7  | medical    | emergency      | no  | no  |
| 101 | 60 | female | Rural | Respiratory      | 12 | medical    | referred       | no  | no  |
| 102 | 53 | female | Rural | Respiratory      | 15 | medical    | emergency      | no  | no  |
| 103 | 25 | male   | Urban | Cardiovascular   | 15 | medical    | emergency      | no  | yes |
| 104 | 49 | female | Rural | Respiratory      | 5  | medical    | referred       | yes | no  |
| 105 | 45 | male   | Rural | Accident         | 7  | medical    | referred       | no  | no  |
| 106 | 30 | female | Rural | Accident         | 6  | medical    | referred       | no  | no  |
| 107 | 64 | male   | Rural | Respiratory      | 3  | medical    | referred       | no  | no  |
| 108 | 24 | male   | Rural | Neurological     | 3  | medical    | emergency      | no  | no  |
| 109 | 21 | male   | Urban | Tetanus          | 15 | medical    | emergency      | yes | no  |
| 110 | 28 | female | Rural | Respiratory      | 13 | obstetrics | referred       | yes | no  |
| 111 | 26 | male   | Urban | Other            | 3  | obstetrics | operating room | no  | no  |
| 112 | 48 | male   | Rural | Accident         | 3  | Surgical   | referred       | yes | no  |
| 113 | 72 | male   | Urban | Respiratory      | 12 | medical    | referred       | no  | no  |
| 114 | 59 | male   | Rural | Respiratory      | 11 | medical    | referred       | yes | no  |
| 115 | 23 | male   | Rural | Other            | 3  | medical    | ward           | no  | no  |
| 116 | 51 | male   | Rural | Gastro intestina | 9  | Surgical   | ward           | no  | no  |
| 117 | 57 | male   | Rural | Neuromascular    | 15 | medical    | emergency      | no  | no  |
| 118 | 38 | female | Urban | Respiratory      | 4  | medical    | ward           | no  | no  |
| 119 | 32 | female | Rural | Respiratory      | 8  | medical    | referred       | no  | no  |
| 120 | 21 | male   | Rural | Other            | 7  | medical    | ward           | yes | no  |
| 121 | 30 | male   | Urban | Accident         | 5  | Surgical   | ward           | no  | yes |
| 122 | 50 | male   | Rural | Gastro intestina | 15 | Surgical   | operating room | no  | no  |
| 123 | 27 | female | Rural | Cardiovascular   | 14 | obstetrics | referred       | no  | no  |
| 124 | 24 | male   | Rural | Gastro intestina | 15 | Surgical   | ward           | no  | no  |
| 125 | 55 | female | Urban | Respiratory      | 15 | medical    | emergency      | no  | no  |
| 126 | 33 | female | Urban | Other            | 11 | obstetrics | ward           | no  | no  |
| 127 | 24 | male   | Urban | Gastro intestina | 15 | Surgical   | referred       | no  | no  |
| 128 | 32 | female | Rural | Respiratory      | 15 | obstetrics | ward           | no  | yes |
| 129 | 40 | male   | Urban | Hematologic      | 15 | medical    | emergency      | no  | no  |
| 130 | 68 | male   | Rural | Neurological     | 6  | medical    | referred       | no  | no  |
| 131 | 28 | male   | Urban | Neuromascular    | 15 | medical    | referred       | yes | no  |
| 132 | 60 | male   | Rural | Neurological     | 3  | medical    | referred       | yes | no  |
| 133 | 47 | female | Rural | Other            | 15 | obstetrics | referred       | no  | no  |
| 134 | 50 | female | Rural | Other            | 15 | Surgical   | ward           | no  | no  |
| 135 | 22 | male   | Urban | Accident         | 9  | Emergency  | emergency      | no  | no  |
| 136 | 41 | male   | Urban | Accident         | 5  | Emergency  | referred       | yes | no  |
| 137 | 70 | female | Rural | Accident         | 6  | Emergency  | emergency      | no  | no  |
| 138 | 35 | male   | Rural | Cardiovascular   | 15 | medical    | emergency      | no  | no  |
| 139 | 55 | female | Rural | Cardiovascular   | 15 | medical    | emergency      | yes | no  |
| 140 | 70 | female | Urban | Cardiovascular   | 15 | medical    | referred       | no  | no  |

|     |    |        |       |                  |    |            |                |     |     |
|-----|----|--------|-------|------------------|----|------------|----------------|-----|-----|
| 141 | 55 | male   | Urban | Respiratory      | 3  | medical    | emergency      | yes | no  |
| 142 | 60 | male   | Urban | Accident         | 9  | Emergency  | ward           | yes | yes |
| 143 | 24 | male   | Rural | Gastro intestina | 15 | Surgical   | operating room | yes | no  |
| 144 | 22 | female | Rural | Other            | 15 | obstetrics | ward           | no  | no  |
| 145 | 25 | male   | Rural | Cardiovascular   | 10 | medical    | emergency      | yes | no  |
| 146 | 26 | female | Urban | Hematologic      | 3  | medical    | emergency      | yes | no  |
| 147 | 39 | male   | Urban | Accident         | 7  | Surgical   | reffered       | no  | yes |
| 148 | 56 | male   | Rural | Neurological     | 5  | medical    | reffered       | no  | no  |
| 149 | 26 | male   | Urban | Respiratory      | 14 | medical    | emergency      | no  | no  |
| 150 | 29 | male   | Rural | Accident         | 5  | Emergency  | reffered       | yes | no  |
| 151 | 66 | male   | Urban | Gastro intestina | 10 | Surgical   | ward           | no  | yes |
| 152 | 51 | male   | Urban | Accident         | 4  | Emergency  | emergency      | no  | no  |
| 153 | 33 | female | Urban | Respiratory      | 15 | medical    | reffered       | no  | no  |
| 154 | 40 | male   | Rural | Neurological     | 10 | Surgical   | ward           | no  | yes |
| 155 | 45 | female | Rural | Cardiovascular   | 15 | medical    | reffered       | yes | no  |
| 156 | 54 | male   | Urban | Neuromascular    | 15 | medical    | reffered       | yes | yes |
| 157 | 24 | male   | Urban | Accident         | 6  | Emergency  | reffered       | no  | no  |
| 158 | 64 | male   | Rural | Accident         | 15 | medical    | emergency      | yes | no  |
| 159 | 22 | female | Rural | Respiratory      | 15 | medical    | emergency      | no  | no  |
| 160 | 27 | female | Rural | Renal            | 15 | medical    | reffered       | no  | no  |
| 161 | 19 | female | Rural | Cardiovascular   | 15 | obstetrics | reffered       | yes | no  |
| 162 | 41 | male   | Rural | Neuromascular    | 15 | Surgical   | ward           | no  | no  |
| 163 | 62 | male   | Rural | Gastro intestina | 15 | Surgical   | ward           | yes | no  |
| 164 | 75 | male   | Urban | Respiratory      | 15 | medical    | reffered       | no  | no  |
| 165 | 25 | male   | Urban | Neuromascular    | 15 | medical    | emergency      | no  | no  |
| 166 | 29 | male   | Urban | Other            | 10 | medical    | emergency      | yes | no  |
| 167 | 24 | female | Urban | Accident         | 11 | medical    | reffered       | no  | no  |
| 168 | 42 | male   | Urban | Neurological     | 6  | medical    | reffered       | no  | no  |
| 169 | 65 | male   | Rural | Respiratory      | 15 | medical    | reffered       | no  | no  |
| 170 | 47 | female | Rural | Accident         | 8  | Surgical   | ward           | no  | no  |
| 171 | 66 | male   | Urban | Renal            | 15 | medical    | reffered       | yes | no  |
| 172 | 44 | male   | Urban | Cardiovascular   | 12 | medical    | ward           | yes | no  |
| 173 | 30 | female | Rural | Other            | 3  | medical    | reffered       | yes | no  |
| 174 | 32 | male   | Urban | Respiratory      | 7  | medical    | reffered       | yes | no  |
| 175 | 80 | female | Urban | Neuromascular    | 15 | Surgical   | reffered       | no  | no  |
| 176 | 65 | female | Urban | Respiratory      | 15 | medical    | emergency      | no  | no  |
| 177 | 30 | male   | Rural | Accident         | 6  | Surgical   | operating room | no  | yes |
| 178 | 19 | male   | Urban | Respiratory      | 15 | Surgical   | emergency      | no  | no  |
| 179 | 42 | female | Rural | Accident         | 10 | Surgical   | emergency      | no  | yes |
| 180 | 75 | female | Urban | Accident         | 8  | Surgical   | reffered       | no  | no  |
| 181 | 29 | female | Urban | Respiratory      | 15 | medical    | emergency      | no  | no  |
| 182 | 64 | male   | Rural | Neurological     | 10 | medical    | ward           | no  | no  |
| 183 | 60 | female | Urban | Neurological     | 9  | medical    | emergency      | no  | no  |
| 184 | 26 | female | Rural | Neurological     | 3  | medical    | emergency      | yes | no  |
| 185 | 36 | male   | Rural | Neurological     | 3  | medical    | emergency      | yes | no  |
| 186 | 35 | male   | Rural | Accident         | 3  | medical    | emergency      | no  | no  |
| 187 | 34 | female | Urban | Neurological     | 4  | obstetrics | emergency      | no  | no  |

|     |    |        |       |                  |    |             |                |     |     |
|-----|----|--------|-------|------------------|----|-------------|----------------|-----|-----|
| 188 | 62 | male   | Urban | Respiratory      | 13 | medical     | ward           | yes | no  |
| 189 | 61 | male   | Urban | Respiratory      | 15 | medical     | emergency      | no  | no  |
| 190 | 41 | female | Rural | Neurological     | 5  | medical     | reffered       | yes | no  |
| 191 | 48 | male   | Rural | Tetanus          | 15 | medical     | ward           | no  | no  |
| 192 | 28 | male   | Urban | Gastro intestina | 15 | Surgical    | operating room | no  | yes |
| 193 | 36 | male   | Urban | Accident         | 6  | Emergency   | emergency      | no  | no  |
| 194 | 56 | male   | Urban | Gastro intestina | 15 | Surgical    | ward           | no  | no  |
| 195 | 31 | female | Rural | Neurological     | 9  | medical     | ward           | no  | no  |
| 196 | 46 | female | Rural | Accident         | 11 | Emergency   | emergency      | no  | no  |
| 197 | 23 | female | Rural | Other            | 15 | medical     | reffered       | yes | no  |
| 198 | 41 | male   | Urban | Cardiovascular   | 5  | medical     | reffered       | yes | no  |
| 199 | 84 | male   | Urban | Respiratory      | 6  | Surgical    | emergency      | no  | no  |
| 200 | 63 | female | Rural | Hematologic      | 7  | medical     | ward           | yes | yes |
| 201 | 82 | male   | Urban | Neuromescular    | 4  | medical     | emergency      | no  | yes |
| 202 | 48 | female | Rural | Respiratory      | 15 | medical     | reffered       | no  | no  |
| 203 | 37 | male   | Urban | Cardiovascular   | 15 | medical     | ward           | no  | no  |
| 204 | 58 | female | Rural | Neurological     | 3  | medical     | emergency      | yes | yes |
| 205 | 74 | male   | Urban | Renal            | 13 | medical     | reffered       | no  | no  |
| 206 | 25 | female | Rural | Accident         | 6  | Emergency   | emergency      | no  | no  |
| 207 | 56 | male   | Urban | Gastro intestina | 14 | Surgical    | emergency      | no  | yes |
| 208 | 60 | male   | Rural | Renal            | 15 | medical     | ward           | yes | yes |
| 209 | 78 | male   | Urban | Respiratory      | 15 | medical     | emergency      | yes | yes |
| 210 | 71 | male   | Urban | Respiratory      | 15 | medical     | emergency      | no  | no  |
| 211 | 86 | female | Rural | Other            | 5  | medical     | emergency      | yes | no  |
| 212 | 38 | male   | Urban | Hematologic      | 12 | medical     | ward           | no  | no  |
| 213 | 81 | male   | Rural | Respiratory      | 8  | medical     | reffered       | yes | yes |
| 214 | 55 | male   | Urban | Neuromescular    | 15 | medical     | emergency      | yes | yes |
| 215 | 78 | female | Rural | Neurological     | 3  | medical     | reffered       | no  | yes |
| 216 | 67 | male   | Urban | Renal            | 6  | medical     | ward           | yes | yes |
| 217 | 47 | male   | Rural | Respiratory      | 9  | obstestrics | operating room | no  | yes |
| 218 | 86 | male   | Rural | Cardiovascular   | 15 | medical     | operating room | no  | no  |
| 219 | 38 | female | Urban | Gastro intestina | 15 | Surgical    | emergency      | no  | yes |
| 220 | 53 | male   | Urban | Accident         | 4  | Emergency   | emergency      | yes | yes |
| 221 | 66 | male   | Rural | Tetanus          | 15 | medical     | ward           | no  | yes |
| 222 | 28 | male   | Urban | Other            | 5  | medical     | reffered       | no  | no  |
| 223 | 74 | male   | Rural | Neurological     | 3  | medical     | reffered       | yes | yes |
| 224 | 90 | male   | Urban | Cardiovascular   | 4  | medical     | emergency      | no  | no  |
| 225 | 68 | female | Rural | Cardiovascular   | 6  | Surgical    | operating room | no  | no  |
| 226 | 70 | male   | Urban | Respiratory      | 5  | Surgical    | operating room | no  | yes |
| 227 | 83 | male   | Urban | Respiratory      | 5  | medical     | operating room | no  | yes |
| 228 | 50 | male   | Urban | Accident         | 5  | Emergency   | emergency      | no  | no  |
| 229 | 48 | male   | Rural | Tetanus          | 15 | medical     | ward           | no  | yes |
| 230 | 62 | female | Rural | Neurological     | 7  | medical     | reffered       | no  | yes |
| 231 | 56 | male   | Rural | Tetanus          | 12 | medical     | ward           | no  | yes |
| 232 | 35 | male   | Rural | Other            | 5  | medical     | reffered       | no  | no  |
| 233 | 78 | male   | Urban | Cardiovascular   | 15 | medical     | emergency      | no  | no  |
| 234 | 39 | male   | Urban | Other            | 11 | medical     | reffered       | no  | yes |

|     |    |        |       |                  |    |             |                |     |     |
|-----|----|--------|-------|------------------|----|-------------|----------------|-----|-----|
| 235 | 74 | male   | Urban | Cardiovascular   | 3  | medical     | emergency      | yes | yes |
| 236 | 86 | male   | Urban | Neurological     | 4  | medical     | emergency      | no  | yes |
| 237 | 69 | female | Rural | Cardiovascular   | 3  | medical     | reffered       | no  | yes |
| 238 | 54 | male   | Rural | Tetanus          | 8  | medical     | ward           | no  | yes |
| 239 | 68 | male   | Urban | Respiratory      | 6  | medical     | emergency      | no  | yes |
| 240 | 78 | male   | Urban | Neurological     | 4  | medical     | reffered       | no  | yes |
| 241 | 83 | female | Rural | Cardiovascular   | 5  | medical     | emergency      | no  | no  |
| 242 | 23 | female | Rural | Other            | 15 | medical     | reffered       | yes | no  |
| 243 | 41 | male   | Urban | Cardiovascular   | 5  | medical     | reffered       | yes | no  |
| 244 | 84 | male   | Urban | Respiratory      | 6  | Surgical    | emergency      | no  | no  |
| 245 | 63 | female | Rural | Hematologic      | 7  | medical     | ward           | yes | yes |
| 246 | 82 | male   | Urban | Neuromascular    | 4  | medical     | emergency      | no  | yes |
| 247 | 48 | female | Rural | Respiratory      | 15 | medical     | reffered       | no  | no  |
| 248 | 37 | male   | Urban | Cardiovascular   | 15 | medical     | ward           | no  | no  |
| 249 | 58 | female | Rural | Neurological     | 3  | medical     | emergency      | yes | yes |
| 250 | 74 | male   | Urban | Renal            | 13 | medical     | reffered       | no  | no  |
| 251 | 25 | female | Rural | Accident         | 6  | Emergency   | emergency      | no  | no  |
| 252 | 56 | male   | Urban | Gastro intestina | 14 | Surgical    | emergency      | no  | yes |
| 253 | 60 | male   | Rural | Renal            | 15 | medical     | ward           | yes | yes |
| 254 | 78 | male   | Urban | Respiratory      | 15 | medical     | emergency      | yes | yes |
| 255 | 71 | male   | Urban | Respiratory      | 15 | medical     | emergency      | no  | no  |
| 256 | 86 | female | Rural | Other            | 5  | medical     | emergency      | yes | no  |
| 257 | 38 | male   | Urban | Hematologic      | 12 | medical     | ward           | no  | no  |
| 258 | 81 | male   | Rural | Respiratory      | 8  | medical     | reffered       | yes | yes |
| 259 | 55 | male   | Urban | Neuromascular    | 15 | medical     | emergency      | yes | yes |
| 260 | 78 | female | Rural | Neurological     | 3  | medical     | reffered       | no  | yes |
| 261 | 67 | male   | Urban | Renal            | 6  | medical     | ward           | yes | yes |
| 262 | 47 | male   | Rural | Respiratory      | 9  | obstestrics | operating room | no  | yes |
| 263 | 86 | male   | Rural | Cardiovascular   | 15 | medical     | operating room | no  | no  |
| 264 | 38 | female | Urban | Gastro intestina | 15 | Surgical    | emergency      | no  | yes |
| 265 | 53 | male   | Urban | Accident         | 4  | Emergency   | emergency      | yes | yes |
| 266 | 66 | male   | Rural | Tetanus          | 15 | medical     | ward           | no  | yes |
| 267 | 28 | male   | Urban | Other            | 5  | medical     | reffered       | no  | no  |
| 268 | 74 | male   | Rural | Neurological     | 3  | Surgical    | reffered       | yes | yes |
| 269 | 90 | male   | Urban | Cardiovascular   | 4  | medical     | emergency      | no  | no  |
| 270 | 68 | female | Rural | Cardiovascular   | 6  | Surgical    | operating room | no  | no  |
| 271 | 70 | male   | Urban | Respiratory      | 5  | Surgical    | operating room | no  | yes |
| 272 | 83 | male   | Urban | Respiratory      | 5  | medical     | operating room | no  | yes |
| 273 | 50 | male   | Urban | Accident         | 5  | Emergency   | emergency      | no  | no  |
| 274 | 48 | male   | Rural | Tetanus          | 15 | medical     | ward           | no  | yes |
| 275 | 62 | female | Rural | Neurological     | 7  | medical     | reffered       | no  | yes |
| 276 | 56 | male   | Rural | Tetanus          | 12 | medical     | ward           | no  | yes |
| 277 | 35 | male   | Rural | Other            | 5  | medical     | reffered       | no  | no  |
| 278 | 78 | male   | Urban | Cardiovascular   | 15 | medical     | emergency      | no  | no  |
| 279 | 39 | male   | Urban | Other            | 11 | medical     | reffered       | no  | yes |
| 280 | 74 | male   | Urban | Cardiovascular   | 3  | medical     | emergency      | yes | yes |
| 281 | 86 | male   | Urban | Neurological     | 4  | medical     | emergency      | no  | yes |

|     |    |        |       |                  |    |             |                |     |     |
|-----|----|--------|-------|------------------|----|-------------|----------------|-----|-----|
| 282 | 69 | female | Rural | Cardiovascular   | 3  | medical     | reffered       | no  | yes |
| 283 | 54 | male   | Rural | Tetanus          | 8  | medical     | ward           | no  | yes |
| 284 | 68 | male   | Urban | Neurological     | 11 | medical     | ward           | no  | yes |
| 285 | 73 | male   | Urban | Neurological     | 4  | medical     | reffered       | no  | yes |
| 286 | 83 | female | Rural | Cardiovascular   | 5  | medical     | emergency      | no  | no  |
| 287 | 68 | female | Urban | Neurological     | 15 | medical     | ward           | no  | no  |
| 288 | 18 | male   | Rural | Tetanus          | 15 | medical     | ward           | no  | yes |
| 289 | 22 | male   | Rural | Neurological     | 4  | medical     | reffered       | no  | no  |
| 290 | 55 | male   | Rural | Neuromascular    | 5  | Surgical    | ward           | no  | no  |
| 291 | 30 | male   | Rural | Gastro intestina | 4  | Surgical    | operating room | no  | no  |
| 292 | 58 | male   | Urban | Tetanus          | 7  | medical     | emergency      | yes | yes |
| 293 | 62 | female | Rural | Tetanus          | 15 | medical     | emergency      | yes | yes |
| 294 | 48 | male   | Urban | Renal            | 15 | Surgical    | emergency      | no  | no  |
| 295 | 65 | male   | Rural | Tetanus          | 15 | medical     | ward           | no  | no  |
| 296 | 50 | female | Rural | Neuromascular    | 9  | medical     | ward           | yes | no  |
| 297 | 54 | male   | Urban | Cardiovascular   | 15 | medical     | ward           | no  | no  |
| 298 | 18 | male   | Rural | Neurological     | 3  | medical     | emergency      | no  | no  |
| 299 | 42 | male   | Urban | Respiratory      | 6  | medical     | emergency      | yes | no  |
| 300 | 58 | female | Urban | Tetanus          | 15 | medical     | ward           | no  | no  |
| 301 | 23 | female | Rural | Neurological     | 7  | medical     | ward           | no  | no  |
| 302 | 40 | male   | Rural | Gastro intestina | 15 | Surgical    | ward           | no  | no  |
| 303 | 56 | male   | Urban | Accident         | 3  | Emergency   | emergency      | no  | no  |
| 304 | 45 | female | Rural | Respiratory      | 8  | obstestrics | ward           | no  | no  |
| 305 | 42 | female | Rural | Neurological     | 3  | obstestrics | emergency      | no  | no  |
| 306 | 53 | female | Rural | Neurological     | 3  | medical     | emergency      | no  | no  |
| 307 | 46 | female | Rural | Tetanus          | 13 | obstestrics | emergency      | no  | yes |
| 308 | 60 | female | Rural | Respiratory      | 15 | medical     | emergency      | no  | no  |
| 309 | 26 | female | Urban | Tetanus          | 11 | obstestrics | emergency      | no  | no  |
| 310 | 48 | female | Urban | Respiratory      | 13 | medical     | ward           | yes | no  |
| 311 | 50 | male   | Urban | Cardiovascular   | 7  | medical     | emergency      | yes | no  |
| 312 | 30 | female | Rural | Other            | 15 | Surgical    | ward           | yes | yes |
| 313 | 52 | female | Rural | Cardiovascular   | 7  | medical     | emergency      | yes | no  |
| 314 | 70 | male   | Rural | Respiratory      | 15 | medical     | reffered       | yes | yes |
| 315 | 53 | male   | Urban | Neurological     | 4  | medical     | reffered       | no  | no  |
| 316 | 70 | male   | Rural | Gastro intestina | 9  | Surgical    | ward           | no  | no  |
| 317 | 68 | male   | Rural | Accident         | 7  | Emergency   | emergency      | no  | no  |
| 318 | 52 | male   | Rural | Respiratory      | 10 | medical     | reffered       | no  | no  |
| 319 | 55 | male   | Rural | Respiratory      | 15 | medical     | emergency      | no  | no  |
| 320 | 57 | male   | Rural | Neurological     | 3  | medical     | emergency      | no  | no  |
| 321 | 43 | male   | Rural | Neurological     | 15 | medical     | ward           | no  | no  |
| 322 | 61 | male   | Urban | Respiratory      | 15 | medical     | emergency      | no  | no  |
| 323 | 58 | female | Urban | Respiratory      | 15 | medical     | ward           | no  | no  |
| 324 | 45 | male   | Rural | Respiratory      | 8  | medical     | reffered       | no  | no  |
| 325 | 52 | female | Rural | Neurological     | 3  | medical     | emergency      | yes | no  |
| 326 | 57 | male   | Rural | Neurological     | 3  | medical     | emergency      | yes | no  |
| 327 | 52 | female | Urban | Accident         | 5  | medical     | reffered       | no  | yes |
| 328 | 51 | male   | Rural | Accident         | 5  | Surgical    | reffered       | no  | yes |

|     |    |        |       |                  |    |            |                |     |     |
|-----|----|--------|-------|------------------|----|------------|----------------|-----|-----|
| 329 | 43 | male   | Rural | Accident         | 1  | medical    | emergency      | yes | no  |
| 330 | 50 | male   | Rural | Respiratory      | 15 | medical    | emergency      | no  | no  |
| 331 | 29 | male   | Rural | Other            | 4  | medical    | reffered       | no  | no  |
| 332 | 52 | male   | Urban | Cardiovascular   | 13 | medical    | emergency      | no  | no  |
| 333 | 92 | male   | Urban | Respiratory      | 15 | medical    | emergency      | no  | no  |
| 334 | 47 | female | Rural | Respiratory      | 3  | medical    | emergency      | no  | no  |
| 335 | 50 | female | Urban | Gastro intestina | 5  | medical    | reffered       | no  | no  |
| 336 | 45 | female | Urban | Respiratory      | 12 | medical    | reffered       | yes | no  |
| 337 | 27 | male   | Urban | Respiratory      | 3  | medical    | emergency      | yes | no  |
| 338 | 35 | male   | Urban | Accident         | 6  | medical    | reffered       | no  | no  |
| 339 | 55 | male   | Rural | Respiratory      | 7  | medical    | ward           | no  | no  |
| 340 | 60 | female | Urban | Cardiovascular   | 14 | medical    | ward           | no  | no  |
| 341 | 68 | female | Rural | Cardiovascular   | 10 | medical    | emergency      | yes | no  |
| 342 | 68 | female | Rural | Neurological     | 3  | medical    | emergency      | no  | yes |
| 343 | 64 | male   | Urban | Respiratory      | 15 | medical    | reffered       | no  | no  |
| 344 | 23 | male   | Rural | Other            | 3  | medical    | reffered       | no  | no  |
| 345 | 72 | male   | Urban | Respiratory      | 15 | medical    | reffered       | yes | no  |
| 346 | 64 | male   | Urban | Respiratory      | 15 | medical    | ward           | yes | no  |
| 347 | 59 | female | Rural | Respiratory      | 5  | obstetrics | reffered       | yes | no  |
| 348 | 62 | male   | Urban | Neurological     | 5  | medical    | reffered       | yes | yes |
| 349 | 70 | male   | Rural | Respiratory      | 6  | medical    | reffered       | yes | yes |
| 350 | 69 | male   | Urban | Respiratory      | 15 | medical    | emergency      | no  | no  |
| 351 | 61 | female | Rural | Other            | 3  | medical    | reffered       | no  | no  |
| 352 | 65 | male   | Rural | Respiratory      | 15 | medical    | ward           | no  | no  |
| 353 | 66 | male   | Rural | Respiratory      | 6  | Surgical   | operating room | no  | no  |
| 354 | 56 | male   | Rural | Neurological     | 3  | medical    | ward           | no  | no  |
| 355 | 72 | male   | Rural | Respiratory      | 15 | medical    | ward           | no  | no  |
| 356 | 25 | female | Rural | Neurological     | 4  | obstetrics | reffered       | no  | no  |
| 357 | 62 | male   | Urban | Respiratory      | 15 | medical    | ward           | no  | no  |
| 358 | 55 | female | Urban | Cardiovascular   | 7  | medical    | emergency      | no  | no  |
| 359 | 60 | female | Rural | Respiratory      | 12 | medical    | reffered       | no  | no  |
| 360 | 63 | male   | Urban | Respiratory      | 5  | medical    | emergency      | no  | no  |
| 361 | 60 | female | Rural | Accident         | 6  | medical    | reffered       | no  | no  |
| 362 | 64 | male   | Rural | Respiratory      | 3  | medical    | reffered       | no  | no  |
| 363 | 24 | male   | Rural | Neurological     | 3  | medical    | emergency      | no  | no  |
| 364 | 72 | male   | Urban | Respiratory      | 12 | medical    | reffered       | no  | no  |
| 365 | 59 | male   | Rural | Respiratory      | 11 | medical    | reffered       | yes | no  |
| 366 | 58 | female | Urban | Respiratory      | 4  | medical    | ward           | no  | no  |
| 367 | 30 | male   | Urban | Accident         | 5  | Surgical   | ward           | no  | yes |
| 368 | 68 | male   | Rural | Neurological     | 6  | medical    | reffered       | no  | no  |
| 369 | 60 | male   | Rural | Neurological     | 3  | medical    | reffered       | yes | no  |
| 370 | 60 | female | Rural | Other            | 15 | Surgical   | ward           | no  | no  |
| 371 | 70 | female | Rural | Accident         | 6  | Emergency  | emergency      | no  | no  |
| 372 | 60 | male   | Urban | Accident         | 9  | Emergency  | ward           | yes | yes |
| 373 | 49 | male   | Urban | Accident         | 7  | Surgical   | reffered       | no  | yes |
| 374 | 66 | male   | Rural | Neurological     | 5  | medical    | reffered       | no  | no  |
| 375 | 66 | male   | Urban | Gastro intestina | 10 | Surgical   | ward           | no  | no  |



|     |    |        |       |                  |    |           |                |     |     |
|-----|----|--------|-------|------------------|----|-----------|----------------|-----|-----|
| 376 | 51 | male   | Urban | Accident         | 4  | Emergency | emergency      | no  | no  |
| 377 | 54 | male   | Urban | Neuromascular    | 15 | medical   | reffered       | yes | yes |
| 378 | 24 | male   | Urban | Accident         | 6  | Emergency | reffered       | no  | no  |
| 379 | 75 | male   | Urban | Respiratory      | 15 | medical   | reffered       | no  | no  |
| 380 | 65 | male   | Rural | Respiratory      | 15 | medical   | reffered       | no  | no  |
| 381 | 66 | male   | Urban | Renal            | 15 | medical   | reffered       | yes | no  |
| 382 | 44 | male   | Urban | Cardiovascular   | 12 | medical   | ward           | yes | no  |
| 383 | 80 | female | Urban | Neuromascular    | 15 | Surgical  | reffered       | no  | no  |
| 384 | 65 | female | Urban | Respiratory      | 15 | medical   | emergency      | no  | no  |
| 385 | 30 | male   | Rural | Accident         | 6  | Surgical  | operating room | no  | yes |
| 386 | 42 | female | Rural | Accident         | 10 | Surgical  | emergency      | yes | yes |
| 387 | 75 | female | Urban | Accident         | 8  | Surgical  | reffered       | no  | no  |
| 388 | 64 | male   | Urban | Neurological     | 9  | medical   | emergency      | no  | no  |
| 389 | 66 | female | Rural | Neurological     | 3  | medical   | emergency      | yes | no  |
| 390 | 62 | male   | Urban | Respiratory      | 3  | medical   | ward           | yes | no  |
| 391 | 68 | male   | Urban | Gastro intestina | 15 | Surgical  | operating room | no  | yes |

| NB  | comorbidity | if yes         | OF  | tracheostomy | metracheostor    | ARDS | pnumonia | gth of hodpital | CU length of sta |
|-----|-------------|----------------|-----|--------------|------------------|------|----------|-----------------|------------------|
| yes | no          |                | no  | no           |                  | yes  | no       | 14              | 8                |
| yes | no          |                | no  | no           |                  | yes  | no       | 14              | 8                |
| no  | yes         | respiratory    | no  | no           |                  | no   | no       | 10              | 10               |
| no  | no          |                | no  | yes          | after intubation | no   | no       | 39              | 29               |
| no  | yes         | other          | no  | no           |                  | yes  | no       | 4               | 4                |
| no  | no          |                | no  | no           |                  | no   | no       | 13              | 13               |
| no  | no          |                | yes | no           |                  | no   | no       | 10              | 9                |
| no  | no          |                | no  | no           |                  | no   | no       | 3               | 3                |
| no  | yes         | renal          | no  | yes          | after intubation | no   | no       | 32              | 27               |
| no  | yes         | renal          | yes | yes          | after intubation | no   | no       | 36              | 28               |
| no  | yes         | respiratory    | yes | no           |                  | yes  | no       | 3               | 3                |
| no  | no          |                | no  | no           |                  | no   | yes      | 14              | 10               |
| no  | yes         | renal          | yes | no           |                  | no   | yes      | 7               | 5                |
| no  | yes         | other          | no  | no           |                  | no   | yes      | 13              | 9                |
| no  | no          |                | no  | no           |                  | no   | no       | 9               | 9                |
| no  | no          |                | no  | no           |                  | no   | no       | 9               | 1                |
| no  | yes         | respiratory    | no  | no           |                  | no   | yes      | 6               | 6                |
| no  | yes         | cardiovascular | yes | no           |                  | yes  | yes      | 4               | 4                |
| no  | yes         | other          | no  | no           |                  | no   | yes      | 9               | 6                |
| no  | no          |                | no  | no           |                  | yes  | yes      | 5               | 5                |
| no  | no          |                | no  | no           |                  | no   | no       | 5               | 3                |
| no  | no          |                | no  | no           |                  | no   | no       | 46              | 13               |
| no  | no          |                | no  | no           |                  | no   | no       | 3               | 3                |
| no  | no          |                | no  | no           |                  | yes  | yes      | 35              | 20               |
| no  | yes         | cardiovascular | yes | no           |                  | no   | no       | 3               | 3                |
| no  | yes         | other          | no  | no           |                  | no   | no       | 22              | 22               |
| no  | yes         | other          | no  | no           |                  | no   | yes      | 29              | 29               |
| no  | no          |                | no  | no           |                  | yes  | yes      | 16              | 16               |
| no  | yes         | hematologic    | no  | no           |                  | no   | yes      | 13              | 11               |
| yes | no          |                | no  | yes          | after intubation | no   | no       | 57              | 28               |
| no  | yes         | other          | yes | no           |                  | yes  | no       | 27              | 11               |
| no  | yes         | other          | no  | no           |                  | no   | no       | 4               | 4                |
| yes | yes         | other          | no  | yes          | after intubation | no   | no       | 29              | 29               |
| no  | yes         | cardiovascular | yes | no           |                  | no   | no       | 1               | 1                |
| no  | no          |                | no  | yes          | after intubation | no   | no       | 4               | 4                |
| no  | no          |                | yes | no           |                  | yes  | yes      | 26              | 22               |
| yes | yes         | other          | no  | no           |                  | no   | no       | 1               | 1                |
| no  | no          |                | no  | no           |                  | no   | no       | 20              | 5                |
| no  | no          |                | no  | no           |                  | no   | yes      | 1               | 1                |
| no  | no          |                | no  | no           |                  | yes  | yes      | 1               | 1                |
| no  | no          |                | no  | no           |                  | no   | yes      | 1               | 1                |
| no  | yes         | respiratory    | no  | no           |                  | no   | yes      | 4               | 4                |
| no  | no          |                | no  | no           |                  | no   | no       | 6               | 6                |
| no  | yes         | hepatic        | no  | no           |                  | no   | no       | 15              | 5                |
| no  | yes         | respiratory    | no  | no           |                  | no   | no       | 3               | 3                |
| no  | no          | hepatic        | no  | no           |                  | no   | yes      | 1               | 1                |

|     |     |                |     |     |                  |     |     |    |    |
|-----|-----|----------------|-----|-----|------------------|-----|-----|----|----|
| no  | yes | other          | no  | no  |                  | yes | yes | 16 | 13 |
| yes | no  |                | no  | no  |                  | yes | yes | 18 | 18 |
| no  | no  |                | no  | no  |                  | yes | yes | 1  | 1  |
| no  | yes | other          | no  | no  |                  | yes | yes | 3  | 3  |
| no  | yes | other          | no  | yes | after intubation | no  | yes | 30 | 30 |
| no  | no  |                | no  | yes | after intubation | no  | no  | 70 | 37 |
| no  | no  |                | no  | no  |                  | no  | yes | 3  | 3  |
| no  | no  |                | no  | no  |                  | no  | yes | 4  | 4  |
| no  | no  |                | no  | no  |                  | yes | yes | 11 | 11 |
| no  | no  |                | no  | no  |                  | yes | yes | 10 | 10 |
| no  | yes | cardiovascular | no  | no  |                  | no  | yes | 6  | 6  |
| no  | yes | other          | no  | no  |                  | no  | yes | 12 | 12 |
| no  | no  |                | no  | no  |                  | no  | yes | 12 | 12 |
| no  | yes | respiratory    | no  | no  |                  | no  | no  | 7  | 7  |
| no  | yes | other          | no  | no  |                  | no  | yes | 12 | 12 |
| yes | no  |                | no  | yes | before intubatio | no  | no  | 8  | 7  |
| no  | no  |                | no  | no  |                  | no  | no  | 9  | 9  |
| no  | no  |                | no  | no  |                  | no  | no  | 2  | 2  |
| yes | no  |                | no  | yes | after intubation | no  | no  | 24 | 24 |
| yes | yes | cardiovascular | no  | no  |                  | yes | yes | 20 | 20 |
| yes | yes | hepatic        | no  | no  |                  | yes | yes | 10 | 10 |
| yes | yes | cardiovascular | no  | no  |                  | no  | yes | 6  | 3  |
| yes | no  |                | yes | no  |                  | no  | no  | 18 | 18 |
| yes | no  |                | no  | no  |                  | no  | no  | 13 | 13 |
| yes | no  |                | no  | yes | after intubation | no  | no  | 27 | 12 |
| yes | yes | cardiovascular | yes | no  |                  | no  | yes | 28 | 5  |
| yes | yes | cardiovascular | no  | no  |                  | no  | no  | 4  | 4  |
| yes | no  |                | no  | yes | after intubation | no  | no  | 3  | 2  |
| yes | no  |                | yes | no  |                  | no  | no  | 34 | 34 |
| yes | no  |                | no  | no  |                  | no  | no  | 6  | 6  |
| no  | yes | other          | no  | no  |                  | yes | yes | 15 | 15 |
| no  | yes | other          | no  | no  |                  | no  | no  | 2  | 2  |
| no  | no  |                | yes | no  |                  | yes | yes | 11 | 9  |
| no  | no  |                | no  | no  |                  | yes | yes | 2  | 2  |
| no  | no  |                | yes | no  |                  | yes | yes | 5  | 3  |
| yes | no  |                | no  | no  |                  | yes | yes | 3  | 3  |
| no  | yes | hematologic    | no  | yes | after intubation | no  | no  | 28 | 28 |
| no  | no  |                | no  | no  |                  | no  | no  | 37 | 37 |
| no  | no  |                | no  | no  |                  | no  | no  | 1  | 1  |
| no  | yes | cardiovascular | no  | no  |                  | yes | yes | 1  | 1  |
| no  | no  |                | yes | no  |                  | no  | no  | 1  | 1  |
| no  | no  |                | no  | no  |                  | yes | yes | 29 | 9  |
| no  | yes | other          | no  | no  |                  | no  | no  | 9  | 5  |
| no  | no  |                | no  | no  |                  | no  | no  | 4  | 4  |
| no  | no  |                | no  | no  |                  | no  | yes | 9  | 9  |
| no  | no  |                | no  | no  |                  | no  | yes | 5  | 5  |
| no  | no  |                | no  | no  |                  | no  | yes | 3  | 3  |

|     |     |                |     |     |                  |     |     |    |    |
|-----|-----|----------------|-----|-----|------------------|-----|-----|----|----|
| no  | yes | other          | no  | no  |                  | no  | yes | 15 | 2  |
| no  | no  |                | no  | no  |                  | yes | no  | 11 | 2  |
| no  | no  |                | yes | no  |                  | yes | yes | 16 | 8  |
| no  | no  |                | no  | no  |                  | no  | no  | 3  | 3  |
| yes | yes | other          | yes | no  |                  | no  | yes | 13 | 9  |
| no  | yes | respiratory    | no  | no  |                  | no  | yes | 6  | 6  |
| no  | yes | respiratory    | no  | no  |                  | no  | yes | 2  | 2  |
| no  | no  |                | no  | no  |                  | yes | yes | 10 | 10 |
| no  | no  |                | yes | no  |                  | no  | yes | 18 | 18 |
| yes | no  |                | no  | no  |                  | yes | yes | 1  | 1  |
| no  | no  |                | yes | no  |                  | yes | no  | 3  | 3  |
| yes | no  |                | yes | no  |                  | no  | yes | 3  | 3  |
| no  | yes | other          | no  | no  |                  | no  | no  | 15 | 15 |
| no  | no  |                | no  | no  |                  | yes | yes | 1  | 1  |
| no  | yes | respiratory    | no  | no  |                  | no  | yes | 10 | 10 |
| no  | no  |                | no  | yes | before intubatio | no  | yes | 10 | 10 |
| no  | no  |                | no  | no  |                  | yes | no  | 6  | 6  |
| no  | yes | hematologic    | no  | no  |                  | no  | yes | 7  | 7  |
| no  | no  |                | no  | no  |                  | no  | yes | 5  | 5  |
| no  | yes | cardiovascular | no  | no  |                  | yes | yes | 4  | 4  |
| no  | yes | renal          | no  | no  |                  | yes | yes | 7  | 7  |
| no  | no  |                | no  | no  |                  | no  | yes | 6  | 5  |
| no  | no  |                | no  | no  |                  | no  | no  | 9  | 7  |
| no  | yes | other          | no  | no  |                  | no  | no  | 18 | 18 |
| no  | yes | other          | yes | no  |                  | yes | yes | 3  | 2  |
| no  | no  |                | no  | no  |                  | yes | yes | 15 | 15 |
| no  | no  |                | no  | no  |                  | no  | no  | 6  | 5  |
| no  | no  |                | no  | no  |                  | no  | no  | 31 | 25 |
| no  | no  |                | no  | no  |                  | no  | no  | 3  | 3  |
| no  | yes | other          | yes | no  |                  | no  | yes | 4  | 4  |
| no  | no  |                | no  | no  |                  | no  | no  | 15 | 23 |
| no  | no  |                | no  | no  |                  | yes | yes | 3  | 3  |
| no  | no  |                | yes | no  |                  | no  | no  | 5  | 2  |
| no  | no  |                | no  | no  |                  | no  | no  | 21 | 21 |
| no  | no  | other          | no  | yes | after intubation | no  | yes | 26 | 24 |
| yes | yes | other          | no  | yes | after intubation | no  | no  | 27 | 18 |
| no  | no  |                | no  | no  |                  | no  | no  | 5  | 5  |
| no  | yes | cardiovascular | yes | no  |                  | no  | yes | 8  | 8  |
| no  | yes | other          | no  | no  |                  | no  | yes | 5  | 5  |
| no  | yes | cardiovascular | no  | no  |                  | no  | yes | 10 | 10 |
| no  | yes | other          | no  | no  |                  | no  | no  | 4  | 1  |
| no  | no  |                | no  | no  |                  | no  | no  | 9  | 9  |
| no  | no  |                | no  | no  |                  | no  | no  | 2  | 2  |
| no  | no  |                | no  | no  |                  | no  | no  | 14 | 14 |
| no  | yes | cardiovascular | no  | no  |                  | no  | no  | 8  | 8  |
| no  | no  |                | no  | no  |                  | yes | no  | 1  | 1  |
| no  | yes | cardiovascular | no  | no  |                  | no  | no  | 15 | 13 |

|     |     |                |     |     |                  |     |     |    |    |
|-----|-----|----------------|-----|-----|------------------|-----|-----|----|----|
| no  | yes | renal          | no  | no  |                  | yes | yes | 13 | 13 |
| no  | yes | other          | no  | no  |                  | no  | yes | 49 | 44 |
| no  | no  |                | no  | no  |                  | no  | no  | 3  | 3  |
| no  | yes | other          | no  | no  |                  | no  | yes | 6  | 6  |
| no  | yes | cardiovascular | no  | no  |                  | yes | yes | 2  | 2  |
| no  | yes | renal          | no  | no  |                  | yes | yes | 13 | 13 |
| no  | yes | cardiovascular | no  | no  |                  | no  | yes | 28 | 23 |
| no  | yes | other          | no  | no  |                  | no  | no  | 3  | 3  |
| no  | yes | hepatic        | yes | no  |                  | no  | yes | 1  | 1  |
| yes | no  |                | no  | no  |                  | no  | no  | 2  | 2  |
| no  | no  |                | no  | no  |                  | no  | no  | 14 | 3  |
| no  | no  |                | no  | no  |                  | no  | yes | 5  | 5  |
| no  | yes | respiratory    | no  | no  |                  | yes | yes | 2  | 2  |
| yes | no  |                | no  | no  |                  | no  | no  | 42 | 34 |
| no  | yes | cardiovascular | yes | no  |                  | no  | no  | 12 | 12 |
| no  | yes | other          | yes | no  |                  | no  | no  | 29 | 26 |
| no  | no  |                | no  | no  |                  | no  | yes | 10 | 10 |
| no  | no  |                | no  | no  |                  | no  | no  | 6  | 6  |
| no  | yes | other          | no  | no  |                  | yes | yes | 3  | 3  |
| no  | yes | cardiovascular | yes | no  |                  | no  | no  | 14 | 10 |
| yes | no  |                | yes | no  |                  | no  | no  | 1  | 1  |
| no  | no  |                | no  | no  |                  | no  | no  | 11 | 5  |
| yes | no  |                | yes | no  |                  | no  | no  | 1  | 1  |
| no  | no  |                | no  | no  |                  | yes | yes | 4  | 4  |
| no  | yes | other          | no  | no  |                  | no  | no  | 3  | 3  |
| yes | no  |                | no  | no  |                  | no  | yes | 20 | 20 |
| no  | yes | cardiovascular | no  | no  |                  | no  | no  | 1  | 1  |
| no  | yes | other          | yes | no  |                  | no  | no  | 12 | 3  |
| no  | yes | renal          | yes | no  |                  | no  | yes | 5  | 5  |
| no  | no  |                | no  | no  |                  | no  | yes | 11 | 5  |
| no  | yes | cardiovascular | yes | no  |                  | no  | yes | 8  | 8  |
| no  | no  |                | yes | no  |                  | yes | yes | 24 | 18 |
| no  | yes | other          | no  | no  |                  | no  | no  | 9  | 9  |
| no  | yes | other          | no  | no  |                  | yes | yes | 1  | 1  |
| no  | no  |                | no  | no  |                  | no  | no  | 2  | 2  |
| no  | yes | other          | yes | no  |                  | yes | yes | 3  | 3  |
| no  | no  |                | no  | yes | after intubation | no  | no  | 41 | 41 |
| no  | no  |                | yes | yes | after intubation | no  | no  | 26 | 26 |
| no  | no  |                | no  | yes | after intubation | no  | no  | 27 | 27 |
| no  | yes | cardiovascular | no  | no  |                  | no  | no  | 28 | 10 |
| no  | yes | respiratory    | no  | no  |                  | yes | yes | 20 | 18 |
| no  | yes | other          | yes | no  |                  | no  | yes | 17 | 11 |
| no  | yes | cardiovascular | yes | no  |                  | no  | no  | 1  | 1  |
| no  | yes | hepatic        | no  | no  |                  | no  | yes | 1  | 1  |
| no  | yes | other          | yes | no  |                  | no  | no  | 2  | 2  |
| no  | no  |                | yes | no  |                  | no  | yes | 1  | 1  |
| no  | yes | other          | yes | no  |                  | no  | yes | 1  | 1  |

|     |     |                |     |     |                  |     |     |    |    |
|-----|-----|----------------|-----|-----|------------------|-----|-----|----|----|
| no  | yes | other          | yes | no  |                  | yes | yes | 19 | 9  |
| no  | yes | renal          | no  | no  |                  | yes | yes | 2  | 2  |
| no  | yes | other          | yes | no  |                  | no  | yes | 6  | 6  |
| yes | no  |                | yes | no  |                  | no  | no  | 8  | 6  |
| no  | no  |                | no  | no  |                  | no  | no  | 29 | 23 |
| no  | no  |                | no  | no  |                  | no  | no  | 16 | 7  |
| no  | yes | other          | yes | no  |                  | no  | no  | 11 | 9  |
| yes | yes | cardiovascular | no  | no  |                  | no  | no  | 27 | 19 |
| no  | no  |                | no  | no  |                  | no  | yes | 5  | 5  |
| no  | no  |                | yes | no  |                  | no  | no  | 1  | 1  |
| no  | no  |                | yes | no  |                  | yes | no  | 1  | 1  |
| no  | yes | other          | no  | no  |                  | no  | no  | 5  | 5  |
| no  | yes | respiratory    | no  | no  |                  | no  | no  | 24 | 24 |
| no  | yes | hepatic        | no  | no  |                  | no  | no  | 27 | 27 |
| no  | yes | respiratory    | no  | no  |                  | yes | yes | 7  | 7  |
| no  | yes | renal          | no  | no  |                  | no  | yes | 12 | 12 |
| no  | yes | cardiovascular | yes | yes | after intubation | no  | no  | 29 | 29 |
| no  | yes | cardiovascular | no  | no  |                  | yes | yes | 18 | 18 |
| no  | no  |                | yes | no  |                  | no  | no  | 7  | 7  |
| no  | no  |                | no  | no  |                  | no  | no  | 25 | 25 |
| no  | yes | cardiovascular | yes | yes | after intubation | no  | no  | 30 | 26 |
| yes | yes | respiratory    | no  | no  |                  | yes | yes | 25 | 25 |
| no  | yes | hematologic    | no  | no  |                  | yes | yes | 17 | 17 |
| yes | yes | other          | yes | no  |                  | no  | no  | 9  | 9  |
| no  | yes | other          | no  | no  |                  | no  | no  | 5  | 5  |
| no  | yes | respiratory    | no  | yes | after intubation | no  | no  | 33 | 33 |
| no  | yes | other          | no  | no  |                  | no  | no  | 31 | 31 |
| no  | yes | other          | no  | no  |                  | no  | no  | 26 | 26 |
| no  | yes | respiratory    | no  | yes | after intubation | no  | no  | 28 | 28 |
| no  | yes | other          | no  | yes | after intubation | yes | yes | 24 | 24 |
| no  | no  |                | yes | no  |                  | no  | no  | 35 | 29 |
| no  | yes | other          | no  | no  |                  | no  | no  | 41 | 35 |
| yes | yes | other          | yes | yes | after intubation | no  | no  | 31 | 31 |
| yes | yes | other          | no  | yes | after intubation | no  | no  | 32 | 29 |
| yes | yes | other          | no  | no  |                  | no  | yes | 15 | 15 |
| no  | yes | hepatic        | yes | no  |                  | no  | no  | 23 | 23 |
| no  | yes | cardiovascular | no  | no  |                  | no  | no  | 18 | 18 |
| no  | yes | hepatic        | no  | no  |                  | no  | no  | 9  | 9  |
| no  | yes | other          | no  | no  |                  | no  | no  | 25 | 25 |
| no  | yes | respiratory    | yes | no  |                  | yes | yes | 43 | 32 |
| no  | yes | other          | no  | no  |                  | no  | no  | 3  | 3  |
| no  | yes | other          | no  | yes | after intubation | no  | no  | 30 | 30 |
| no  | yes | other          | no  | yes | after intubation | no  | no  | 29 | 29 |
| no  | yes | other          | no  | no  |                  | no  | no  | 26 | 23 |
| no  | no  |                | no  | no  |                  | no  | yes | 5  | 5  |
| no  | yes | cardiovascular | yes | no  |                  | yes | yes | 8  | 8  |
| no  | yes | other          | no  | no  |                  | yes | yes | 24 | 24 |

|     |     |                |     |     |                  |     |     |    |    |
|-----|-----|----------------|-----|-----|------------------|-----|-----|----|----|
| no  | yes | other          | no  | no  |                  | no  | no  | 22 | 22 |
| no  | yes | respiratory    | no  | no  |                  | no  | no  | 25 | 25 |
| no  | yes | other          | yes | no  |                  | yes | yes | 27 | 27 |
| no  | yes | cardiovascular | no  | yes | after intubation | no  | no  | 36 | 32 |
| no  | yes | renal          | yes | yes | after intubation | no  | no  | 25 | 25 |
| no  | yes | cardiovascular | no  | no  |                  | no  | no  | 28 | 28 |
| no  | yes | other          | yes | no  |                  | no  | no  | 4  | 4  |
| no  | no  |                | yes | no  |                  | no  | no  | 1  | 1  |
| no  | no  |                | yes | no  |                  | yes | no  | 1  | 1  |
| no  | yes | other          | no  | no  |                  | no  | no  | 5  | 5  |
| no  | yes | respiratory    | no  | no  |                  | no  | no  | 24 | 24 |
| no  | yes | hepatic        | no  | no  |                  | no  | no  | 27 | 27 |
| no  | yes | respiratory    | no  | no  |                  | yes | yes | 7  | 7  |
| no  | yes | cardiovascular | no  | no  |                  | no  | yes | 12 | 12 |
| no  | yes | cardiovascular | yes | yes | after intubation | no  | no  | 29 | 29 |
| no  | yes | cardiovascular | no  | no  |                  | yes | yes | 18 | 18 |
| no  | no  |                | yes | no  |                  | no  | no  | 7  | 7  |
| yes | yes | renal          | no  | no  |                  | no  | no  | 25 | 25 |
| no  | yes | cardiovascular | yes | yes | after intubation | no  | no  | 30 | 26 |
| yes | yes | respiratory    | no  | no  |                  | yes | yes | 25 | 25 |
| no  | yes | hematologic    | no  | no  |                  | yes | yes | 17 | 17 |
| yes | yes | other          | yes | no  |                  | no  | no  | 9  | 9  |
| no  | yes | other          | no  | no  |                  | no  | no  | 5  | 5  |
| no  | yes | respiratory    | no  | yes | after intubation | no  | no  | 33 | 33 |
| no  | yes | other          | no  | no  |                  | no  | no  | 31 | 31 |
| no  | yes | other          | no  | no  |                  | no  | no  | 26 | 26 |
| no  | yes | respiratory    | no  | yes | after intubation | no  | no  | 28 | 28 |
| no  | yes | other          | no  | yes | after intubation | yes | yes | 24 | 24 |
| no  | no  |                | yes | no  |                  | no  | no  | 35 | 29 |
| no  | yes | other          | no  | no  |                  | no  | no  | 41 | 35 |
| yes | yes | other          | yes | yes | after intubation | no  | no  | 31 | 31 |
| yes | yes | other          | no  | yes | after intubation | no  | no  | 32 | 29 |
| yes | yes | other          | no  | no  |                  | no  | yes | 15 | 15 |
| no  | yes | hepatic        | yes | no  |                  | no  | no  | 23 | 23 |
| no  | yes | cardiovascular | no  | no  |                  | no  | no  | 18 | 18 |
| no  | yes | hepatic        | no  | no  |                  | no  | no  | 9  | 9  |
| no  | yes | other          | no  | no  |                  | no  | no  | 25 | 25 |
| no  | yes | respiratory    | yes | no  |                  | yes | yes | 43 | 32 |
| no  | yes | other          | no  | no  |                  | no  | no  | 3  | 3  |
| no  | yes | other          | no  | yes | after intubation | no  | no  | 30 | 30 |
| no  | yes | other          | no  | yes | after intubation | no  | no  | 29 | 29 |
| no  | yes | other          | no  | no  |                  | no  | no  | 26 | 23 |
| no  | no  |                | no  | no  |                  | no  | yes | 5  | 5  |
| no  | yes | cardiovascular | yes | no  |                  | yes | yes | 8  | 8  |
| no  | yes | other          | no  | no  |                  | yes | yes | 24 | 24 |
| no  | yes | other          | no  | no  |                  | no  | no  | 22 | 22 |
| no  | yes | respiratory    | no  | no  |                  | no  | no  | 25 | 25 |

|     |     |                |     |     |                  |     |     |    |    |
|-----|-----|----------------|-----|-----|------------------|-----|-----|----|----|
| no  | yes | other          | yes | no  |                  | yes | yes | 27 | 27 |
| no  | yes | cardiovascular | no  | yes | after intubation | no  | no  | 36 | 32 |
| no  | yes | respiratory    | yes | yes | after intubation | no  | no  | 25 | 25 |
| no  | yes | cardiovascular | no  | no  |                  | no  | no  | 28 | 28 |
| no  | yes | other          | yes | no  |                  | no  | no  | 4  | 4  |
| yes | no  |                | no  | no  |                  | yes | no  | 14 | 8  |
| no  | no  |                | no  | yes | after intubation | no  | no  | 39 | 29 |
| no  | no  |                | no  | no  |                  | no  | no  | 13 | 13 |
| no  | no  |                | yes | no  |                  | no  | no  | 10 | 9  |
| no  | no  |                | no  | no  |                  | no  | no  | 3  | 3  |
| no  | yes | renal          | yes | no  |                  | no  | no  | 32 | 27 |
| no  | yes | renal          | yes | yes | after intubation | no  | no  | 36 | 28 |
| no  | yes | respiratory    | yes | no  |                  | yes | no  | 3  | 3  |
| no  | no  |                | no  | no  |                  | no  | yes | 14 | 10 |
| no  | yes | other          | no  | no  |                  | no  | yes | 13 | 9  |
| no  | yes | cardiovascular | yes | no  |                  | yes | yes | 4  | 2  |
| no  | no  |                | no  | no  |                  | no  | no  | 9  | 9  |
| no  | yes | renal          | yes | no  |                  | yes | yes | 4  | 4  |
| no  | yes | other          | no  | no  |                  | no  | yes | 9  | 6  |
| no  | no  |                | no  | no  |                  | no  | no  | 5  | 3  |
| no  | no  |                | no  | no  |                  | no  | no  | 59 | 13 |
| no  | no  |                | no  | no  |                  | no  | no  | 3  | 3  |
| no  | no  |                | no  | no  |                  | yes | yes | 35 | 20 |
| no  | yes | cardiovascular | yes | no  |                  | no  | no  | 3  | 3  |
| no  | yes | other          | no  | no  |                  | no  | no  | 22 | 22 |
| no  | yes | other          | no  | no  |                  | no  | yes | 29 | 29 |
| no  | no  |                | no  | no  |                  | yes | yes | 16 | 16 |
| no  | yes | hematologic    | no  | no  |                  | no  | yes | 13 | 11 |
| no  | yes | other          | yes | no  |                  | yes | no  | 27 | 11 |
| no  | yes | other          | no  | no  |                  | no  | no  | 4  | 4  |
| yes | yes | other          | no  | yes | after intubation | no  | no  | 29 | 29 |
| no  | yes | cardiovascular | yes | no  |                  | no  | no  | 1  | 1  |
| no  | no  |                | yes | no  |                  | yes | yes | 26 | 22 |
| yes | yes | other          | no  | no  |                  | no  | no  | 1  | 1  |
| no  | no  |                | no  | no  |                  | no  | no  | 20 | 5  |
| no  | no  |                | no  | no  |                  | no  | yes | 1  | 1  |
| no  | no  |                | no  | no  |                  | yes | yes | 1  | 1  |
| no  | yes | respiratory    | no  | no  |                  | no  | yes | 4  | 4  |
| no  | no  |                | no  | no  |                  | no  | no  | 6  | 6  |
| no  | yes | hepatic        | no  | no  |                  | no  | no  | 15 | 5  |
| no  | yes | respiratory    | no  | no  |                  | no  | yes | 1  | 1  |
| no  | yes | other          | no  | no  |                  | yes | yes | 16 | 13 |
| yes | no  |                | no  | no  |                  | yes | yes | 18 | 18 |
| no  | no  |                | no  | no  |                  | yes | yes | 1  | 1  |
| no  | yes | other          | no  | no  |                  | yes | yes | 3  | 3  |
| no  | yes | other          | no  | yes | after intubation | no  | yes | 30 | 30 |
| no  | no  |                | no  | yes | after intubation | no  | no  | 70 | 37 |



|     |     |                |     |     |                  |     |     |    |    |
|-----|-----|----------------|-----|-----|------------------|-----|-----|----|----|
| no  | no  |                | no  | no  |                  | no  | yes | 3  | 3  |
| no  | no  |                | no  | no  |                  | yes | yes | 11 | 11 |
| no  | no  |                | no  | no  |                  | yes | yes | 10 | 10 |
| no  | yes | cardiovascular | no  | no  |                  | no  | yes | 6  | 6  |
| no  | yes | other          | no  | no  |                  | no  | yes | 12 | 12 |
| no  | no  |                | no  | no  |                  | no  | no  | 9  | 9  |
| yes | no  |                | no  | yes | after intubation | no  | no  | 24 | 24 |
| yes | yes | cardiovascular | no  | no  |                  | yes | no  | 20 | 20 |
| yes | yes | hepatic        | no  | no  |                  | yes | yes | 10 | 10 |
| yes | no  |                | yes | no  |                  | no  | no  | 18 | 18 |
| yes | no  |                | no  | yes | after intubation | no  | no  | 27 | 12 |
| yes | yes | cardiovascular | yes | no  |                  | no  | yes | 28 | 5  |
| yes | yes | cardiovascular | no  | no  |                  | no  | no  | 4  | 4  |
| yes | no  |                | yes | no  |                  | no  | no  | 34 | 34 |
| no  | yes | other          | no  | no  |                  | yes | yes | 15 | 15 |
| no  | yes | other          | no  | no  |                  | no  | no  | 2  | 2  |
| no  | no  |                | no  | no  |                  | yes | yes | 2  | 2  |
| no  | no  |                | yes | no  |                  | yes | yes | 5  | 3  |
| yes | no  |                | no  | no  |                  | yes | yes | 3  | 3  |
| no  | yes | hematologic    | no  | yes | after intubation | no  | no  | 28 | 28 |
| no  | no  |                | no  | no  |                  | no  | no  | 37 | 37 |
| no  | yes | cardiovascular | no  | no  |                  | yes | yes | 1  | 1  |
| no  | no  |                | yes | no  |                  | no  | no  | 1  | 1  |
| no  | no  |                | no  | no  |                  | yes | yes | 29 | 9  |
| no  | yes | other          | no  | no  |                  | no  | no  | 9  | 5  |
| no  | no  |                | no  | no  |                  | no  | yes | 9  | 9  |
| no  | no  |                | yes | no  |                  | yes | yes | 19 | 10 |
| no  | no  |                | no  | no  |                  | no  | no  | 3  | 3  |
| yes | yes | other          | yes | no  |                  | no  | yes | 13 | 9  |
| no  | yes | respiratory    | no  | no  |                  | no  | yes | 2  | 2  |
| no  | no  |                | no  | no  |                  | yes | yes | 10 | 10 |
| no  | no  |                | yes | no  |                  | yes | yes | 18 | 18 |
| no  | yes | other          | no  | no  |                  | no  | no  | 15 | 15 |
| no  | no  |                | no  | no  |                  | yes | yes | 1  | 1  |
| no  | yes | respiratory    | no  | no  |                  | no  | yes | 10 | 10 |
| no  | yes | respiratory    | no  | no  |                  | yes | yes | 4  | 4  |
| no  | yes | cardiovascular | no  | no  |                  | yes | yes | 7  | 7  |
| no  | yes | other          | yes | no  |                  | yes | yes | 3  | 2  |
| no  | no  |                | no  | no  |                  | no  | no  | 6  | 25 |
| no  | no  |                | no  | no  |                  | no  | no  | 10 | 5  |
| no  | yes | other          | no  | no  |                  | no  | yes | 10 | 5  |
| no  | yes | other          | no  | no  |                  | no  | no  | 5  | 1  |
| no  | no  |                | no  | no  |                  | no  | no  | 14 | 14 |
| no  | yes | other          | no  | no  |                  | no  | yes | 49 | 44 |
| no  | yes | cardiovascular | no  | no  |                  | no  | yes | 28 | 23 |
| no  | yes | other          | no  | no  |                  | no  | no  | 3  | 3  |
| no  | no  |                | no  | no  |                  | no  | no  | 14 | 3  |

|    |     |                |     |     |                  |     |     |    |    |
|----|-----|----------------|-----|-----|------------------|-----|-----|----|----|
| no | no  |                | no  | no  |                  | no  | yes | 5  | 5  |
| no | yes | other          | yes | no  |                  | no  | no  | 29 | 26 |
| no | no  |                | no  | no  |                  | no  | yes | 10 | 10 |
| no | no  |                | no  | no  |                  | yes | yes | 4  | 4  |
| no | yes | cardiovascular | yes | no  |                  | no  | yes | 5  | 5  |
| no | yes | cardiovascular | yes | no  |                  | no  | yes | 8  | 8  |
| no | no  |                | yes | no  |                  | yes | yes | 24 | 18 |
| no | no  |                | no  | no  |                  | no  | no  | 2  | 2  |
| no | yes | other          | yes | no  |                  | yes | yes | 3  | 3  |
| no | no  |                | no  | yes | after intubation | no  | no  | 41 | 41 |
| no | no  |                | no  | yes | after intubation | no  | no  | 27 | 27 |
| no | yes | cardiovascular | no  | no  |                  | no  | no  | 28 | 10 |
| no | yes | cardiovascular | yes | no  |                  | no  | no  | 1  | 1  |
| no | yes | renal          | no  | no  |                  | no  | yes | 1  | 1  |
| no | yes | other          | yes | no  |                  | yes | yes | 19 | 9  |
| no | no  |                | no  | no  |                  | no  | no  | 29 | 23 |

| CMV              | CPR | mode | LSMV | sepsis | dialysis | comp | outcome   | plt | Cr   |
|------------------|-----|------|------|--------|----------|------|-----------|-----|------|
| neurological     | no  | A/C  | 6    | yes    | no       | no   | transfer  | 267 | 1.06 |
| neurological     | no  | A/C  | 6    | yes    | no       | no   | transfer  | 267 | 1.06 |
| e respiratory fa | no  | A/C  | 4    | no     | no       | no   | discharge | 422 | 0.63 |
| neuromuscular    | yes | A/C  | 24   | yes    | no       | no   | death     | 186 | 0.95 |
| e respiratory fa | no  | A/C  | 3    | no     | no       | no   | transfer  | 451 | 1.08 |
| neurological     | no  | A/C  | 13   | no     | no       | no   | LAMT      | 31  | 0.83 |
| other            | no  | A/C  | 9    | no     | no       | no   | death     | 93  | 2.48 |
| other            | no  | A/C  | 3    | no     | no       | no   | death     | 113 | 1.68 |
| neuromuscular    | no  | A/C  | 23   | yes    | no       | yes  | death     | 160 | 1.8  |
| cardiovascular   | yes | SIMV | 24   | yes    | no       | yes  | death     | 200 | 1.4  |
| e respiratory fa | no  | SIMV | 3    | no     | no       | no   | LAMT      | 150 | 0.6  |
| neuromuscular    | no  | SIMV | 10   | no     | no       | no   | death     | 154 | 1.23 |
| hematological    | no  | SIMV | 5    | no     | no       | no   | death     | 148 | 12.3 |
| e respiratory fa | no  | A/C  | 8    | yes    | no       | no   | death     | 299 | 0.58 |
| e respiratory fa | yes | A/C  | 2    | no     | no       | no   | death     | 191 | 1.78 |
| other            | no  | A/C  | 2    | no     | no       | no   | transfer  | 154 | 0.49 |
| e respiratory fa | no  | A/C  | 2    | no     | no       | no   | transfer  | 326 | 0.83 |
| neurological     | no  | A/C  | 3    | no     | no       | no   | death     | 524 | 2.03 |
| e respiratory fa | no  | A/C  | 4    | yes    | no       | no   | death     | 172 | 0.96 |
| neurological     | yes | A/C  | 5    | no     | no       | no   | death     | 85  | 1.35 |
| e respiratory fa | no  | SIMV | 3    | no     | no       | no   | LAMT      | 170 | 1.14 |
| e respiratory fa | no  | SIMV | 10   | yes    | no       | no   | death     | 197 | 0.88 |
| e respiratory fa | yes | A/C  | 3    | no     | no       | no   | death     | 222 | 0.56 |
| e respiratory fa | no  | SIMV | 14   | yes    | no       | yes  | reffered  | 169 | 0.75 |
| hematological    | no  | A/C  | 3    | no     | no       | no   | death     | 37  | 2.12 |
| neurological     | no  | A/C  | 19   | yes    | no       | no   | transfer  | 209 | 0.72 |
| e respiratory fa | no  | SIMV | 24   | yes    | no       | yes  | LAMT      | 4   | 0.44 |
| e respiratory fa | no  | SIMV | 12   | yes    | no       | no   | discharge | 192 | 4.82 |
| hematological    | yes | A/C  | 11   | no     | no       | no   | death     | 408 | 0.72 |
| e respiratory fa | no  | A/C  | 25   | yes    | no       | yes  | death     | 161 | 0.82 |
| neurological     | yes | A/C  | 11   | yes    | no       | no   | death     | 23  | 0.5  |
| neurological     | yes | A/C  | 4    | no     | no       | no   | death     | 326 | 2.78 |
| hematological    | no  | A/C  | 23   | yes    | no       | yes  | death     | 240 | 0.11 |
| neurological     | yes | A/C  | 1    | no     | no       | no   | death     | 163 | 0.43 |
| neuromuscular    | yes | A/C  | 3    | no     | no       | no   | death     | 150 | 0.79 |
| e respiratory fa | yes | A/C  | 22   | yes    | no       | yes  | death     | 140 | 4.52 |
| neurological     | no  | A/C  | 1    | no     | no       | no   | reffered  | 582 | 0.85 |
| e respiratory fa | no  | A/C  | 5    | yes    | no       | no   | LAMT      | 124 | 1.05 |
| e respiratory fa | no  | A/C  | 1    | no     | no       | no   | transfer  | 113 | 0.97 |
| e respiratory fa | yes | A/C  | 1    | no     | no       | no   | death     | 137 | 2.47 |
| e respiratory fa | yes | A/C  | 1    | no     | no       | no   | death     | 472 | 0.99 |
| e respiratory fa | yes | A/C  | 2    | no     | no       | no   | transfer  | 89  | 1.1  |
| e respiratory fa | no  | A/C  | 4    | no     | no       | no   | transfer  | 298 | 1.08 |
| neuromuscular    | no  | A/C  | 5    | no     | no       | no   | transfer  | 341 | 0.47 |
| e respiratory fa | no  | A/C  | 3    | no     | no       | no   | transfer  | 306 | 0.99 |
| e respiratory fa | yes | A/C  | 1    | no     | no       | no   | death     | 153 | 1.45 |

|                  |     |      |    |     |    |     |           |     |       |
|------------------|-----|------|----|-----|----|-----|-----------|-----|-------|
| e respiratory fa | yes | A/C  | 13 | no  | no | no  | death     | 188 | 0.72  |
| e respiratory fa | no  | A/C  | 12 | no  | no | no  | transfer  | 649 | 0.76  |
| e respiratory fa | yes | A/C  | 1  | no  | no | no  | death     | 289 | 0.88  |
| e respiratory fa | yes | A/C  | 3  | no  | no | no  | death     | 261 | 1.02  |
| neuromuscular    | no  | A/C  | 22 | yes | no | yes | death     | 469 | 0.65  |
| other            | no  | A/C  | 25 | yes | no | yes | death     | 441 | 0.59  |
| neurological     | yes | A/C  | 3  | no  | no | no  | death     | 304 | 0.65  |
| e respiratory fa | yes | A/C  | 4  | no  | no | no  | death     | 198 | 2.98  |
| e respiratory fa | no  | A/C  | 6  | no  | no | no  | transfer  | 243 | 0.93  |
| e respiratory fa | no  | A/C  | 5  | no  | no | no  | transfer  | 258 | 1.11  |
| neurological     | no  | A/C  | 5  | no  | no | no  | transfer  | 378 | 3.03  |
| e respiratory fa | yes | A/C  | 12 | no  | no | no  | death     | 365 | 1.123 |
| e respiratory fa | yes | A/C  | 4  | yes | no | no  | death     | 153 | 1.11  |
| other            | no  | SIMV | 3  | yes | no | no  | transfer  | 260 | 0.5   |
| e respiratory fa | no  | A/C  | 9  | no  | no | no  | discharge | 88  | 1.05  |
| neuromuscular    | yes | CPAP | 4  | no  | no | no  | death     | 224 | 1     |
| neurological     | no  | A/C  | 5  | yes | no | no  | discharge | 148 | 1.38  |
| neurological     | yes | A/C  | 2  | no  | no | no  | death     | 290 | 2.09  |
| e respiratory fa | no  | A/C  | 10 | no  | no | no  | transfer  | 437 | 0.7   |
| neurological     | no  | A/C  | 16 | no  | no | no  | LAMT      | 253 | 1.23  |
| neuromuscular    | yes | A/C  | 3  | no  | no | yes | death     | 50  | 0.79  |
| neurological     | yes | A/C  | 3  | no  | no | no  | death     | 281 | 1.32  |
| neuromuscular    | no  | A/C  | 12 | no  | no | yes | death     | 347 | 0.9   |
| renal            | no  | A/C  | 11 | no  | no | no  | discharge | 380 | 1     |
| neuromuscular    | no  | A/C  | 6  | yes | no | no  | transfer  | 559 | 0.71  |
| e respiratory fa | no  | A/C  | 5  | yes | no | yes | death     | 249 | 1.24  |
| e respiratory fa | yes | A/C  | 4  | no  | no | no  | death     | 170 | 3.2   |
| neuromuscular    | no  | A/C  | 2  | no  | no | no  | death     | 217 | 1.13  |
| e respiratory fa | no  | A/C  | 27 | yes | no | yes | death     | 99  | 1.18  |
| e respiratory fa | no  | A/C  | 4  | no  | no | no  | transfer  | 104 | 0.6   |
| e respiratory fa | no  | A/C  | 15 | no  | no | no  | LAMT      | 232 | 2.4   |
| neurological     | no  | A/C  | 2  | no  | no | no  | transfer  | 316 | 1.03  |
| e respiratory fa | no  | A/C  | 7  | no  | no | no  | death     | 135 | 4.22  |
| e respiratory fa | yes | A/C  | 2  | no  | no | no  | death     | 256 | 1.4   |
| e respiratory fa | yes | A/C  | 3  | yes | no | no  | death     | 85  | 3.96  |
| e respiratory fa | yes | A/C  | 3  | no  | no | no  | death     | 122 | 1.33  |
| neurological     | no  | A/C  | 24 | yes | no | yes | death     | 310 | 0.78  |
| neurological     | no  | A/C  | 36 | yes | no | yes | death     | 351 | 2.55  |
| e respiratory fa | no  | A/C  | 1  | no  | no | no  | death     | 362 | 2.85  |
| e respiratory fa | yes | A/C  | 1  | no  | no | no  | death     | 323 | 1.97  |
| e respiratory fa | yes | A/C  | 1  | no  | no | no  | death     | 187 | 2.24  |
| e respiratory fa | no  | A/C  | 9  | no  | no | no  | LAMT      | 261 | 0.7   |
| e respiratory fa | no  | A/C  | 5  | no  | no | no  | death     | 93  | 2.21  |
| e respiratory fa | no  | SIMV | 3  | no  | no | no  | transfer  | 129 | 2.7   |
| neurological     | no  | A/C  | 3  | no  | no | no  | discharge | 88  | 0.83  |
| e respiratory fa | no  | A/C  | 4  | no  | no | no  | transfer  | 16  | 0.53  |
| e respiratory fa | yes | A/C  | 3  | no  | no | no  | death     | 183 | 0.98  |

|                  |     |      |    |     |    |     |           |     |      |
|------------------|-----|------|----|-----|----|-----|-----------|-----|------|
| e respiratory fa | yes | A/C  | 2  | yes | no | no  | death     | 213 | 1.22 |
| e respiratory fa | yes | A/C  | 2  | no  | no | no  | death     | 345 | 1    |
| e respiratory fa | yes | A/C  | 6  | no  | no | no  | death     | 21  | 2.59 |
| neurological     | no  | SIMV | 2  | no  | no | no  | discharge | 149 | 0.49 |
| e respiratory fa | yes | A/C  | 9  | no  | no | no  | death     | 195 | 0.83 |
| e respiratory fa | no  | SIMV | 5  | no  | no | no  | transfer  | 152 | 0.37 |
| e respiratory fa | yes | A/C  | 2  | no  | no | no  | death     | 186 | 1.03 |
| e respiratory fa | no  | SIMV | 10 | yes | no | no  | LAMT      | 380 | 3.32 |
| e respiratory fa | yes | A/C  | 18 | yes | no | no  | death     | 335 | 0.65 |
| e respiratory fa | yes | A/C  | 1  | yes | no | no  | death     | 111 | 1.9  |
| e respiratory fa | yes | A/C  | 3  | yes | no | no  | death     | 242 | 3.94 |
| e respiratory fa | no  | A/C  | 3  | no  | no | no  | death     | 239 | 1.41 |
| e respiratory fa | yes | A/C  | 15 | yes | no | yes | death     | 227 | 0.5  |
| e respiratory fa | yes | A/C  | 1  | no  | no | no  | death     | 230 | 0.94 |
| neurological     | no  | A/C  | 8  | no  | no | no  | transfer  | 173 | 1.3  |
| neuromuscular    | yes | A/C  | 9  | yes | no | no  | death     | 405 | 1.7  |
| e respiratory fa | yes | A/C  | 6  | yes | no | no  | death     | 255 | 1.1  |
| e respiratory fa | no  | A/C  | 3  | no  | no | no  | transfer  | 177 | 1.24 |
| neurological     | yes | A/C  | 5  | no  | no | no  | death     | 159 | 2.35 |
| e respiratory fa | yes | A/C  | 4  | no  | no | no  | death     | 84  | 1.23 |
| e respiratory fa | yes | A/C  | 7  | no  | no | no  | death     | 154 | 2.02 |
| neurological     | no  | SIMV | 2  | no  | no | no  | discharge | 279 | 1.12 |
| e respiratory fa | no  | A/C  | 7  | no  | no | no  | LAMT      | 202 | 0.97 |
| neuromuscular    | yes | A/C  | 18 | yes | no | yes | death     | 133 | 0.88 |
| e respiratory fa | yes | A/C  | 2  | no  | no | no  | death     | 150 | 1.17 |
| e respiratory fa | no  | A/C  | 12 | no  | no | no  | transfer  | 253 | 1.23 |
| hematological    | yes | A/C  | 5  | no  | no | yes | death     | 131 | 5.7  |
| e respiratory fa | no  | A/C  | 23 | yes | no | yes | transfer  | 670 | 0.79 |
| e respiratory fa | no  | A/C  | 3  | no  | no | no  | transfer  | 200 | 0.9  |
| e respiratory fa | yes | A/C  | 4  | no  | no | no  | death     | 52  | 6.62 |
| e respiratory fa | yes | A/C  | 8  | yes | no | yes | death     | 188 | 1.06 |
| e respiratory fa | yes | A/C  | 1  | no  | no | no  | death     | 362 | 0.49 |
| hematological    | yes | A/C  | 2  | no  | no | no  | discharge | 26  | 1.63 |
| e respiratory fa | no  | A/C  | 16 | yes | no | no  | transfer  | 161 | 1.04 |
| e respiratory fa | no  | A/C  | 2  | yes | no | yes | transfer  | 143 | 0.64 |
| e respiratory fa | yes | A/C  | 16 | yes | no | yes | death     | 256 | 0.97 |
| neurological     | no  | A/C  | 5  | no  | no | no  | discharge | 192 | 1.15 |
| e respiratory fa | yes | A/C  | 7  | yes | no | no  | death     | 97  | 1.38 |
| neurological     | yes | A/C  | 5  | yes | no | no  | death     | 85  | 0.79 |
| e respiratory fa | no  | A/C  | 10 | yes | no | no  | transfer  | 99  | 0.84 |
| hematological    | yes | A/C  | 1  | no  | no | no  | death     | 108 | 0.84 |
| e respiratory fa | no  | A/C  | 2  | no  | no | no  | transfer  | 119 | 0.63 |
| e respiratory fa | no  | A/C  | 2  | no  | no | no  | death     | 138 | 1.89 |
| e respiratory fa | no  | A/C  | 14 | yes | no | no  | LAMT      | 188 | 0.62 |
| cardiovascular   | no  | A/C  | 8  | yes | no | no  | LAMT      | 128 | 2.03 |
| e respiratory fa | no  | A/C  | 1  | no  | no | no  | LAMT      | 181 | 0.64 |
| cardiovascular   | no  | A/C  | 3  | yes | no | no  | transfer  | 159 | 0.55 |

|                  |     |      |    |     |     |     |           |     |      |
|------------------|-----|------|----|-----|-----|-----|-----------|-----|------|
| e respiratory fa | yes | A/C  | 9  | no  | no  | no  | death     | 257 | 3.19 |
| e respiratory fa | no  | A/C  | 27 | yes | no  | yes | death     | 396 | 0.34 |
| e respiratory fa | yes | A/C  | 3  | no  | no  | no  | death     | 85  | 0.28 |
| e respiratory fa | no  | A/C  | 4  | no  | no  | no  | transfer  | 696 | 0.4  |
| e respiratory fa | yes | A/C  | 2  | no  | no  | no  | death     | 156 | 0.46 |
| hematological    | yes | A/C  | 9  | no  | yes | no  | death     | 5   | 5.29 |
| e respiratory fa | no  | A/C  | 23 | yes | no  | yes | transfer  | 240 | 2.54 |
| e respiratory fa | yes | A/C  | 3  | no  | no  | no  | death     | 303 | 2.17 |
| e respiratory fa | yes | A/C  | 1  | no  | no  | no  | death     | 295 | 1.44 |
| e respiratory fa | yes | A/C  | 2  | no  | no  | no  | death     | 276 | 1.02 |
| e respiratory fa | no  | A/C  | 3  | yes | no  | no  | transfer  | 490 | 2.5  |
| neurological     | no  | A/C  | 5  | no  | no  | no  | death     | 173 | 0.65 |
| e respiratory fa | no  | SIMV | 2  | no  | no  | no  | discharge | 154 | 0.38 |
| e respiratory fa | no  | A/C  | 27 | yes | no  | yes | transfer  | 299 |      |
| e respiratory fa | no  | A/C  | 12 | no  | no  | no  | death     | 214 | 1.14 |
| neuromuscular    | no  | A/C  | 26 | yes | no  | no  | death     | 107 | 0.64 |
| e respiratory fa | no  | A/C  | 9  | no  | no  | no  | discharge | 147 | 0.52 |
| e respiratory fa | yes | A/C  | 6  | no  | no  | no  | death     | 128 | 1.4  |
| e respiratory fa | yes | A/C  | 3  | no  | no  | no  | death     | 150 | 1.09 |
| renal            | no  | A/C  | 10 | no  | yes | no  | LAMT      | 133 | 7.9  |
| e respiratory fa | yes | A/C  | 1  | no  | no  | no  | death     | 97  | 0.2  |
| neurological     | no  | SIMV | 5  | no  | no  | no  | discharge | 88  | 0.4  |
| e respiratory fa | yes | A/C  | 1  | no  | no  | no  | death     | 114 | 2.2  |
| e respiratory fa | no  | A/C  | 2  | no  | no  | no  | reffered  | 189 | 0.99 |
| e respiratory fa | no  | A/C  | 3  | no  | no  | no  | discharge | 174 | 0.76 |
| e respiratory fa | no  | A/C  | 11 | no  | no  | no  | LAMT      | 470 | 0.74 |
| e respiratory fa | yes | A/C  | 1  | no  | no  | no  | death     | 100 | 1.83 |
| neurological     | yes | A/C  | 3  | no  | no  | no  | death     | 171 | 0.99 |
| cardiovascular   | yes | A/C  | 5  | no  | yes | no  | death     | 216 | 1.51 |
| e respiratory fa | no  | A/C  | 5  | yes | no  | no  | transfer  | 133 | 1.02 |
| e respiratory fa | yes | A/C  | 3  | no  | yes | no  | death     | 290 | 7.66 |
| e respiratory fa | yes | A/C  | 18 | no  | no  | no  | death     | 372 | 0.74 |
| e respiratory fa | yes | A/C  | 9  | no  | no  | no  | death     | 92  | 1.71 |
| e respiratory fa | yes | A/C  | 1  | no  | no  | no  | death     | 64  | 0.66 |
| e respiratory fa | yes | A/C  | 1  | no  | no  | no  | death     | 366 | 2.24 |
| e respiratory fa | yes | A/C  | 3  | no  | no  | no  | death     | 297 | 1    |
| e respiratory fa | yes | A/C  | 23 | yes | no  | no  | reffered  | 148 | 0.87 |
| e respiratory fa | no  | A/C  | 16 | yes | no  | no  | death     | 444 | 0.94 |
| e respiratory fa | no  | A/C  | 23 | yes | no  | no  | transfer  | 194 | 0.53 |
| e respiratory fa | no  | A/C  | 10 | no  | no  | no  | transfer  | 257 | 0.73 |
| e respiratory fa | no  | A/C  | 18 | yes | no  | no  | discharge | 155 | 0.55 |
| e respiratory fa | yes | A/C  | 11 | no  | yes | no  | death     | 180 | 2.11 |
| e respiratory fa | yes | A/C  | 1  | no  | no  | no  | death     | 148 | 0.86 |
| hematological    | yes | A/C  | 1  | no  | no  | no  | death     | 164 | 3.15 |
| neurological     | yes | A/C  | 1  | no  | no  | no  | death     | 128 | 0.59 |
| e respiratory fa | yes | A/C  | 1  | no  | no  | no  | death     | 276 | 2.3  |
| neurological     | yes | A/C  | 1  | no  | no  | no  | death     | 240 | 0.58 |

|                  |     |      |    |     |     |     |           |     |      |
|------------------|-----|------|----|-----|-----|-----|-----------|-----|------|
| e respiratory fa | yes | A/C  | 9  | yes | no  | no  | death     | 258 | 0.95 |
| e respiratory fa | no  | A/C  | 2  | no  | yes | no  | referred  | 208 | 4.83 |
| neurological     | yes | A/C  | 6  | no  | no  | no  | death     | 193 | 4.41 |
| e respiratory fa | yes | A/C  | 6  | no  | no  | no  | death     | 163 | 0.77 |
| e respiratory fa | no  | A/C  | 23 | yes | no  | no  | transfer  | 198 | 1.37 |
| e respiratory fa | no  | A/C  | 7  | no  | no  | no  | discharge | 155 | 0.65 |
| e respiratory fa | yes | A/C  | 9  | yes | no  | no  | death     | 103 | 2.15 |
| neurological     | no  | A/C  | 15 | yes | no  | no  | discharge | 387 | 0.48 |
| e respiratory fa | no  | SIMV | 3  | no  | no  | no  | discharge | 318 | 0.9  |
| e respiratory fa | yes | A/C  | 1  | no  | no  | no  | death     | 274 | 1.23 |
| neurological     | yes | A/C  | 1  | no  | no  | no  | death     | 203 | 4.5  |
| e respiratory fa | no  | A/C  | 5  | no  | no  | no  | discharge | 105 | 0.66 |
| neurological     | no  | A/C  | 24 | yes | yes | yes | death     | 164 | 0.44 |
| e respiratory fa | yes | A/C  | 25 | yes | yes | no  | death     | 156 | 0.47 |
| e respiratory fa | yes | A/C  | 7  | no  | no  | no  | death     | 128 | 0.85 |
| cardiovascular   | no  | A/C  | 12 | yes | yes | no  | death     | 139 | 8.05 |
| neurological     | no  | A/C  | 24 | yes | no  | yes | death     | 117 | 0.88 |
| e respiratory fa | yes | A/C  | 18 | no  | yes | no  | death     | 129 | 9.03 |
| e respiratory fa | no  | SIMV | 7  | no  | no  | no  | transfer  | 135 | 0.59 |
| e respiratory fa | no  | A/C  | 24 | yes | no  | no  | death     | 304 | 0.23 |
| cardiovascular   | yes | A/C  | 22 | yes | yes | no  | death     | 384 | 0.78 |
| e respiratory fa | no  | A/C  | 25 | yes | no  | no  | death     | 374 | 0.78 |
| e respiratory fa | no  | A/C  | 15 | yes | no  | no  | transfer  | 360 | 1.05 |
| e respiratory fa | yes | A/C  | 9  | no  | no  | no  | death     | 340 | 1.09 |
| hematological    | no  | SIMV | 5  | no  | no  | no  | discharge | 158 | 1.03 |
| neuromuscular    | yes | A/C  | 23 | yes | no  | yes | death     | 151 | 0.55 |
| neuromuscular    | yes | A/C  | 26 | yes | no  | no  | death     | 142 | 1.01 |
| neurological     | no  | A/C  | 24 | yes | no  | no  | death     | 137 | 0.92 |
| e respiratory fa | yes | A/C  | 22 | yes | yes | no  | death     | 191 | 5.89 |
| e respiratory fa | no  | A/C  | 22 | yes | no  | no  | transfer  | 204 | 0.32 |
| neurological     | no  | A/C  | 29 | no  | yes | no  | transfer  | 222 | 0.33 |
| e respiratory fa | no  | A/C  | 29 | yes | no  | yes | transfer  | 389 | 0.67 |
| e respiratory fa | no  | A/C  | 24 | yes | no  | no  | death     | 363 | 1.05 |
| neuromuscular    | yes | A/C  | 25 | yes | no  | no  | death     | 378 | 0.55 |
| neurological     | no  | A/C  | 13 | yes | no  | no  | transfer  | 325 | 0.23 |
| neurological     | yes | A/C  | 23 | no  | no  | no  | death     | 330 | 0.88 |
| neurological     | no  | A/C  | 18 | no  | no  | no  | death     | 322 | 0.93 |
| e respiratory fa | yes | SIMV | 9  | no  | no  | no  | death     | 350 | 1.03 |
| e respiratory fa | no  | A/C  | 23 | yes | no  | no  | transfer  | 294 | 0.55 |
| neurological     | no  | A/C  | 30 | yes | no  | yes | death     | 335 | 0.62 |
| e respiratory fa | yes | A/C  | 3  | no  | no  | no  | death     | 255 | 0.28 |
| neuromuscular    | no  | A/C  | 23 | yes | no  | no  | death     | 263 | 0.45 |
| neurological     | no  | SIMV | 26 | yes | no  | no  | transfer  | 240 | 0.89 |
| neuromuscular    | yes | SIMV | 23 | yes | no  | no  | death     | 220 | 0.74 |
| e respiratory fa | no  | A/C  | 3  | no  | no  | no  | discharge | 187 | 0.65 |
| e respiratory fa | no  | A/C  | 6  | no  | no  | no  | transfer  | 163 | 0.84 |
| neurological     | yes | A/C  | 24 | yes | no  | no  | death     | 146 | 0.33 |

|                  |     |      |    |     |     |     |           |     |       |
|------------------|-----|------|----|-----|-----|-----|-----------|-----|-------|
| e respiratory fa | no  | A/C  | 22 | yes | no  | no  | transfer  | 194 | 0.62  |
| neurological     | yes | A/C  | 23 | yes | no  | yes | death     | 360 | 0.48  |
| neurological     | yes | A/C  | 27 | yes | no  | yes | death     | 335 | 1.02  |
| neuromuscular    | no  | A/C  | 27 | yes | no  | yes | transfer  | 363 | 0.84  |
| e respiratory fa | yes | A/C  | 23 | yes | yes | no  | death     | 340 | 0.49  |
| neurological     | no  | A/C  | 28 | yes | no  | yes | death     | 266 | 0.841 |
| neurological     | no  | A/C  | 4  | no  | no  | no  | death     | 259 | 0.77  |
| e respiratory fa | yes | A/C  | 1  | no  | no  | no  | death     | 274 | 1.23  |
| neurological     | yes | A/C  | 1  | no  | no  | no  | death     | 203 | 4.5   |
| e respiratory fa | no  | A/C  | 5  | no  | no  | no  | discharge | 104 | 0.61  |
| neurological     | no  | A/C  | 24 | yes | yes | yes | death     | 166 | 0.54  |
| e respiratory fa | yes | A/C  | 25 | yes | yes | no  | death     | 146 | 0.37  |
| e respiratory fa | yes | A/C  | 7  | no  | no  | no  | death     | 138 | 0.75  |
| cardiovascular   | no  | A/C  | 12 | yes | yes | no  | death     | 149 | 9     |
| neurological     | no  | A/C  | 24 | yes | no  | yes | death     | 119 | 0.77  |
| e respiratory fa | yes | A/C  | 18 | no  | yes | no  | death     | 324 | 8.74  |
| e respiratory fa | no  | SIMV | 7  | no  | no  | no  | transfer  | 137 | 0.69  |
| e respiratory fa | no  | A/C  | 24 | yes | no  | no  | death     | 324 | 0.28  |
| cardiovascular   | yes | A/C  | 22 | yes | yes | no  | death     | 365 | 0.74  |
| e respiratory fa | no  | A/C  | 25 | yes | no  | no  | death     | 362 | 0.87  |
| e respiratory fa | no  | A/C  | 15 | yes | no  | no  | transfer  | 345 | 1.02  |
| e respiratory fa | yes | A/C  | 9  | no  | no  | no  | death     | 331 | 1.01  |
| hematological    | no  | SIMV | 5  | no  | no  | no  | discharge | 158 | 1.03  |
| neuromuscular    | yes | A/C  | 23 | yes | no  | yes | death     | 152 | 0.56  |
| neuromuscular    | yes | A/C  | 26 | yes | no  | no  | death     | 148 | 1.01  |
| neurological     | no  | A/C  | 24 | yes | no  | no  | death     | 139 | 0.82  |
| e respiratory fa | yes | A/C  | 22 | yes | yes | no  | death     | 191 | 5.89  |
| e respiratory fa | no  | A/C  | 22 | yes | no  | no  | transfer  | 206 | 0.32  |
| neurological     | no  | A/C  | 29 | no  | yes | no  | transfer  | 222 | 0.33  |
| e respiratory fa | no  | A/C  | 29 | yes | no  | yes | transfer  | 389 | 0.67  |
| e respiratory fa | no  | A/C  | 24 | yes | no  | no  | death     | 365 | 1.06  |
| neuromuscular    | yes | A/C  | 25 | yes | no  | no  | death     | 378 | 0.63  |
| neurological     | no  | A/C  | 13 | yes | no  | no  | transfer  | 325 | 0.23  |
| neurological     | yes | A/C  | 23 | no  | no  | no  | death     | 330 | 0.88  |
| neurological     | no  | A/C  | 18 | no  | no  | no  | death     | 326 | 0.92  |
| e respiratory fa | yes | SIMV | 9  | no  | no  | no  | death     | 350 | 1.03  |
| e respiratory fa | no  | A/C  | 23 | yes | no  | no  | transfer  | 294 | 0.53  |
| neurological     | no  | A/C  | 30 | yes | no  | yes | death     | 335 | 0.62  |
| e respiratory fa | yes | A/C  | 3  | no  | no  | no  | death     | 255 | 0.28  |
| neuromuscular    | no  | A/C  | 23 | yes | no  | no  | death     | 263 | 0.45  |
| neurological     | no  | SIMV | 26 | yes | no  | no  | transfer  | 240 | 0.89  |
| neuromuscular    | yes | SIMV | 23 | yes | no  | no  | death     | 220 | 0.74  |
| e respiratory fa | no  | A/C  | 3  | no  | no  | no  | discharge | 187 | 0.65  |
| e respiratory fa | no  | A/C  | 6  | no  | no  | no  | transfer  | 163 | 0.84  |
| neurological     | yes | A/C  | 24 | yes | no  | no  | death     | 149 | 0.33  |
| e respiratory fa | no  | A/C  | 22 | yes | no  | no  | transfer  | 194 | 0.62  |
| neurological     | no  | A/C  | 23 | yes | no  | yes | death     | 360 | 0.48  |



|                  |     |      |    |     |     |     |           |     |       |
|------------------|-----|------|----|-----|-----|-----|-----------|-----|-------|
| neurological     | yes | A/C  | 27 | yes | no  | yes | death     | 335 | 1.02  |
| neuromuscular    | no  | A/C  | 27 | yes | no  | yes | transfer  | 363 | 0.84  |
| e respiratory fa | yes | A/C  | 23 | yes | yes | no  | death     | 340 | 0.49  |
| neurological     | no  | A/C  | 28 | yes | no  | yes | death     | 266 | 0.81  |
| neurological     | no  | A/C  | 4  | no  | no  | no  | death     | 259 | 0.77  |
| neurological     | no  | A/C  | 6  | yes | no  | no  | transfer  | 267 | 1.06  |
| neuromuscular    | yes | A/C  | 24 | yes | no  | no  | death     | 186 | 0.95  |
| neurological     | no  | A/C  | 13 | no  | no  | no  | LAMT      | 31  | 0.83  |
| other            | no  | A/C  | 9  | no  | no  | no  | death     | 93  | 2.48  |
| other            | yes | A/C  | 3  | no  | no  | no  | death     | 113 | 1.68  |
| neuromuscular    | no  | A/C  | 23 | yes | no  | yes | death     | 160 | 1.8   |
| cardiovascular   | yes | SIMV | 24 | yes | no  | yes | death     | 200 | 1.4   |
| e respiratory fa | no  | SIMV | 3  | no  | no  | no  | LAMT      | 150 | 0.6   |
| neuromuscular    | no  | SIMV | 10 | no  | no  | no  | death     | 154 | 1.23  |
| e respiratory fa | yes | A/C  | 8  | yes | no  | no  | death     | 299 | 0.58  |
| e respiratory fa | yes | A/C  | 2  | no  | no  | no  | death     | 191 | 1.78  |
| e respiratory fa | no  | A/C  | 2  | no  | no  | no  | transfer  | 154 | 0.49  |
| neurological     | yes | A/C  | 3  | no  | yes | no  | death     | 524 | 2.03  |
| e respiratory fa | no  | A/C  | 4  | yes | no  | no  | death     | 172 | 0.99  |
| e respiratory fa | no  | SIMV | 3  | no  | no  | no  | LAMT      | 170 | 1.14  |
| e respiratory fa | no  | SIMV | 10 | yes | no  | no  | death     | 197 | 0.88  |
| e respiratory fa | yes | A/C  | 3  | no  | no  | no  | death     | 222 | 0.56  |
| e respiratory fa | no  | SIMV | 14 | yes | no  | yes | reffered  | 169 | 0.75  |
| hematological    | yes | A/C  | 3  | no  | no  | no  | death     | 37  | 2.12  |
| neurological     | no  | A/C  | 19 | yes | no  | no  | transfer  | 209 | 0.72  |
| e respiratory fa | no  | SIMV | 24 | yes | no  | yes | LAMT      | 4   | 0.44  |
| e respiratory fa | no  | SIMV | 12 | yes | no  | no  | discharge | 192 | 4.823 |
| hematological    | yes | A/C  | 11 | no  | no  | no  | death     | 408 | 0.72  |
| neurological     | yes | A/C  | 11 | yes | no  | no  | death     | 23  | 0.5   |
| neurological     | yes | A/C  | 4  | no  | no  | no  | death     | 326 | 2.78  |
| hematological    | no  | A/C  | 23 | yes | no  | yes | death     | 240 | 0.11  |
| neurological     | yes | A/C  | 1  | no  | no  | no  | death     | 163 | 0.43  |
| e respiratory fa | yes | A/C  | 22 | yes | yes | yes | death     | 140 | 4.52  |
| neurological     | no  | A/C  | 1  | no  | no  | no  | reffered  | 582 | 0.85  |
| e respiratory fa | no  | A/C  | 5  | yes | no  | no  | LAMT      | 124 | 1.05  |
| e respiratory fa | no  | A/C  | 1  | no  | no  | no  | transfer  | 113 | 0.97  |
| e respiratory fa | yes | A/C  | 1  | no  | no  | no  | death     | 137 | 2.47  |
| e respiratory fa | yes | A/C  | 1  | no  | no  | no  | death     | 472 | 0.91  |
| e respiratory fa | no  | A/C  | 4  | no  | no  | no  | transfer  | 298 | 1.08  |
| neuromuscular    | no  | A/C  | 5  | no  | no  | no  | transfer  | 341 | 0.47  |
| e respiratory fa | yes | A/C  | 1  | no  | no  | no  | death     | 153 | 2.45  |
| e respiratory fa | yes | A/C  | 13 | no  | no  | no  | death     | 188 | 0.72  |
| e respiratory fa | no  | A/C  | 12 | no  | no  | no  | transfer  | 649 | 0.76  |
| e respiratory fa | yes | A/C  | 1  | no  | no  | no  | death     | 289 | 0.88  |
| e respiratory fa | yes | A/C  | 3  | no  | no  | no  | death     | 261 | 1.02  |
| neuromuscular    | no  | A/C  | 22 | yes | no  | yes | death     | 469 | 0.65  |
| other            | no  | A/C  | 25 | yes | no  | yes | death     | 441 | 0.59  |

|                  |     |      |    |     |     |     |           |     |      |
|------------------|-----|------|----|-----|-----|-----|-----------|-----|------|
| neurological     | yes | A/C  | 3  | no  | no  | no  | death     | 304 | 0.6  |
| e respiratory fa | no  | A/C  | 6  | no  | no  | no  | transfer  | 243 | 0.93 |
| e respiratory fa | no  | A/C  | 5  | no  | no  | no  | transfer  | 258 | 1.11 |
| neurological     | no  | A/C  | 5  | no  | yes | no  | transfer  | 378 | 3.03 |
| e respiratory fa | no  | A/C  | 9  | no  | no  | no  | discharge | 88  | 1.05 |
| neurological     | no  | A/C  | 5  | yes | no  | no  | discharge | 148 | 1.35 |
| e respiratory fa | no  | A/C  | 10 | no  | no  | no  | transfer  | 437 | 0.7  |
| neurological     | no  | A/C  | 16 | yes | no  | no  | LAMT      | 253 | 1.23 |
| neuromuscular    | yes | A/C  | 10 | yes | no  | yes | death     | 50  | 0.79 |
| neuromuscular    | no  | A/C  | 12 | no  | no  | yes | death     | 347 | 0.9  |
| neuromuscular    | no  | A/C  | 6  | yes | no  | no  | transfer  | 559 | 0.71 |
| e respiratory fa | no  | A/C  | 5  | yes | no  | yes | death     | 249 | 1.24 |
| e respiratory fa | yes | A/C  | 4  | no  | no  | no  | death     | 170 | 3.2  |
| e respiratory fa | no  | A/C  | 27 | yes | no  | yes | death     | 99  | 1.18 |
| e respiratory fa | no  | A/C  | 15 | no  | no  | no  | LAMT      | 232 | 2.4  |
| neurological     | no  | A/C  | 2  | no  | no  | no  | transfer  | 316 | 1.03 |
| e respiratory fa | yes | A/C  | 2  | no  | no  | no  | death     | 250 | 1.4  |
| e respiratory fa | yes | A/C  | 3  | yes | no  | no  | death     | 85  | 3.96 |
| e respiratory fa | yes | A/C  | 3  | no  | no  | no  | death     | 122 | 1.33 |
| neurological     | no  | A/C  | 24 | yes | no  | yes | death     | 310 | 0.78 |
| neurological     | no  | A/C  | 36 | yes | no  | yes | death     | 351 | 2.55 |
| e respiratory fa | yes | A/C  | 1  | no  | no  | no  | death     | 323 | 1.97 |
| e respiratory fa | yes | A/C  | 1  | no  | no  | no  | death     | 187 | 2.24 |
| e respiratory fa | no  | A/C  | 9  | no  | no  | no  | LAMT      | 261 | 0.7  |
| e respiratory fa | no  | A/C  | 5  | no  | no  | no  | death     | 93  | 2.21 |
| neurological     | no  | A/C  | 3  | no  | no  | no  | discharge | 88  | 0.83 |
| e respiratory fa | yes | A/C  | 8  | no  | no  | no  | death     | 21  | 2.59 |
| neurological     | no  | SIMV | 2  | no  | no  | no  | discharge | 149 | 0.49 |
| e respiratory fa | yes | A/C  | 9  | no  | no  | no  | death     | 195 | 0.83 |
| e respiratory fa | yes | A/C  | 1  | no  | no  | no  | death     | 186 | 1.03 |
| e respiratory fa | no  | SIMV | 10 | yes | no  | no  | LAMT      | 380 | 3.32 |
| e respiratory fa | yes | A/C  | 18 | yes | no  | no  | death     | 335 | 0.67 |
| e respiratory fa | yes | A/C  | 15 | yes | no  | yes | death     | 227 | 0.5  |
| e respiratory fa | yes | A/C  | 1  | no  | no  | no  | death     | 230 | 0.94 |
| neurological     | no  | A/C  | 9  | no  | no  | no  | transfer  | 173 | 1.3  |
| e respiratory fa | yes | A/C  | 4  | no  | no  | no  | death     | 84  | 1.23 |
| e respiratory fa | yes | A/C  | 7  | no  | no  | no  | death     | 154 | 2.02 |
| e respiratory fa | yes | A/C  | 2  | no  | no  | no  | death     | 150 | 1.17 |
| e respiratory fa | no  | A/C  | 23 | yes | no  | yes | transfer  | 670 | 0.79 |
| neurological     | no  | A/C  | 5  | no  | no  | no  | discharge | 192 | 1.15 |
| neurological     | yes | A/C  | 5  | yes | no  | no  | death     | 85  | 0.79 |
| hematological    | yes | A/C  | 1  | no  | no  | no  | death     | 108 | 0.84 |
| e respiratory fa | no  | A/C  | 14 | yes | no  | no  | LAMT      | 188 | 0.62 |
| e respiratory fa | no  | A/C  | 27 | yes | no  | yes | death     | 396 | 0.34 |
| e respiratory fa | no  | A/C  | 23 | yes | no  | yes | transfer  | 240 | 2.54 |
| e respiratory fa | yes | A/C  | 3  | no  | no  | no  | death     | 303 | 2.17 |
| e respiratory fa | no  | A/C  | 3  | yes | no  | no  | transfer  | 490 | 2.5  |

|                  |     |     |    |     |     |    |           |     |       |
|------------------|-----|-----|----|-----|-----|----|-----------|-----|-------|
| neurological     | no  | A/C | 5  | no  | no  | no | death     | 173 | 0.63  |
| neuromuscular    | no  | A/C | 26 | yes | no  | no | death     | 107 | 0.64  |
| e respiratory fa | no  | A/C | 9  | no  | no  | no | discharge | 147 | 0.52  |
| e respiratory fa | no  | A/C | 2  | no  | no  | no | reffered  | 189 | 0.99  |
| e respiratory fa | yes | A/C | 5  | no  | yes | no | death     | 216 | 1.51  |
| e respiratory fa | yes | A/C | 3  | no  | yes | no | death     | 290 | 7.66  |
| e respiratory fa | yes | A/C | 18 | no  | no  | no | death     | 372 | 0.74  |
| e respiratory fa | yes | A/C | 1  | no  | no  | no | death     | 366 | 2.24  |
| e respiratory fa | yes | A/C | 3  | no  | no  | no | death     | 297 | 1     |
| e respiratory fa | yes | A/C | 23 | yes | no  | no | reffered  | 148 | 0.87  |
| e respiratory fa | no  | A/C | 23 | yes | no  | no | transfer  | 194 | 0.53  |
| e respiratory fa | no  | A/C | 10 | no  | no  | no | transfer  | 257 | 0.73  |
| e respiratory fa | yes | A/C | 1  | no  | no  | no | death     | 148 | 0.86  |
| hematological    | yes | A/C | 1  | no  | no  | no | death     | 164 | 3.154 |
| e respiratory fa | yes | A/C | 9  | yes | no  | no | death     | 258 | 0.95  |
| e respiratory fa | no  | A/C | 23 | yes | no  | no | transfer  | 198 | 1.37  |

| temperature | SBp | DBp | HR  | RR | FI02 | SpO2 | GCScat | pnumoniacat | LScat |
|-------------|-----|-----|-----|----|------|------|--------|-------------|-------|
| 36.5        | 130 | 75  | 108 | 28 | 100  | 86   | 3      | 2           | 2     |
| 36.5        | 130 | 75  | 108 | 28 | 100  | 86   | 3      | 2           | 2     |
| 36          | 130 | 80  | 120 | 28 | 60   | 90   | 3      | 2           | 2     |
| 36.6        | 104 | 68  | 94  | 24 | 40   | 96   | 3      | 2           | 2     |
| 36.7        | 140 | 80  | 156 | 50 | 50   | 80   | 3      | 2           | 1     |
| 36          | 109 | 60  | 91  | 18 | 95   | 94   | 1      | 2           | 2     |
| 35.9        | 90  | 60  | 124 | 22 | 90   | 96   | 1      | 2           | 2     |
| 37.4        | 92  | 52  | 134 | 18 | 100  | 99   | 1      | 2           | 1     |
| 35          | 90  | 50  | 120 | 26 | 90   | 93   | 1      | 2           | 2     |
| 36.3        | 100 | 70  | 98  | 24 | 70   | 96   | 3      | 2           | 2     |
| 37          | 100 | 60  | 78  | 18 | 50   | 96   | 3      | 2           | 1     |
| 37.6        | 140 | 80  | 112 | 40 | 95   | 93   | 3      | 1           | 2     |
| 36.4        | 103 | 65  | 108 | 15 | 100  | 96   | 3      | 1           | 2     |
| 34.2        | 120 | 88  | 86  | 15 | 40   | 95   | 2      | 1           | 2     |
| 35          | 100 | 60  | 82  | 26 | 40   | 70   | 1      | 2           | 2     |
| 37.8        | 150 | 100 | 140 | 38 | 100  | 70   | 1      | 2           | 2     |
| 36.8        | 100 | 60  | 137 | 50 | 80   | 83   | 3      | 1           | 2     |
| 36.1        | 90  | 60  | 80  | 28 | 100  | 80   | 1      | 1           | 1     |
| 37          | 140 | 70  | 84  | 48 | 80   | 84   | 3      | 1           | 2     |
| 38.1        | 110 | 70  | 108 | 32 | 50   | 63   | 2      | 1           | 2     |
| 38.3        | 120 | 70  | 68  | 30 | 100  | 91   | 1      | 2           | 2     |
| 32          | 100 | 70  | 92  | 20 | 100  | 92   | 3      | 2           | 2     |
| 35          | 72  | 39  | 82  | 13 | 100  | 60   | 1      | 2           | 1     |
| 35.7        | 90  | 56  | 139 | 28 | 70   | 83   | 1      | 1           | 2     |
| 36.6        | 160 | 110 | 89  | 28 | 100  | 68   | 1      | 2           | 1     |
| 34          | 90  | 60  | 120 | 5  | 100  | 72   | 1      | 2           | 2     |
| 36          | 140 | 80  | 110 | 29 | 90   | 78   | 3      | 1           | 2     |
| 35.8        | 140 | 70  | 110 | 42 | 100  | 44   | 3      | 1           | 2     |
| 39.4        | 120 | 80  | 119 | 22 | 90   | 80   | 2      | 1           | 2     |
| 37.1        | 99  | 67  | 89  | 28 | 70   | 85   | 2      | 2           | 2     |
| 36.7        | 90  | 60  | 86  | 24 | 70   | 85   | 1      | 2           | 2     |
| 36.4        | 132 | 70  | 82  | 30 | 100  | 70   | 1      | 2           | 1     |
| 36          | 130 | 70  | 124 | 20 | 100  | 91   | 3      | 2           | 2     |
| 34.3        | 70  | 40  | 108 | 5  | 100  | 68   | 1      | 2           | 1     |
| 37.3        | 90  | 50  | 111 | 18 | 100  | 91   | 3      | 2           | 1     |
| 36.5        | 120 | 80  | 80  | 40 | 100  | 70   | 3      | 1           | 2     |
| 34.8        | 130 | 75  | 62  | 10 | 100  | 64   | 1      | 2           | 1     |
| 36.3        | 110 | 70  | 98  | 32 | 100  | 87   | 2      | 2           | 2     |
| 37          | 83  | 62  | 109 | 28 | 100  | 96   | 1      | 1           | 1     |
| 39.2        | 90  | 50  | 140 | 44 | 100  | 47   | 2      | 1           | 1     |
| 37.1        | 85  | 50  | 106 | 45 | 100  | 79   | 1      | 1           | 1     |
| 35.5        | 135 | 95  | 115 | 27 | 100  | 87   | 3      | 1           | 1     |
| 34          | 110 | 70  | 123 | 28 | 100  | 81   | 1      | 2           | 2     |
| 36.5        | 110 | 70  | 88  | 22 | 100  | 90   | 3      | 2           | 2     |
| 36          | 100 | 70  | 90  | 40 | 100  | 79   | 3      | 2           | 1     |
| 37.2        | 80  | 50  | 112 | 34 | 100  | 60   | 3      | 1           | 1     |

|      |     |     |     |    |     |    |   |   |   |
|------|-----|-----|-----|----|-----|----|---|---|---|
| 37.6 | 90  | 50  | 108 | 34 | 100 | 82 | 3 | 1 | 2 |
| 37.2 | 90  | 60  | 88  | 22 | 60  | 86 | 2 | 1 | 2 |
| 38.7 | 70  | 60  | 120 | 30 | 80  | 87 | 1 | 1 | 1 |
| 33   | 110 | 70  | 100 | 39 | 100 | 80 | 1 | 1 | 1 |
| 38   | 118 | 65  | 121 | 27 | 100 | 99 | 3 | 1 | 2 |
| 36.5 | 150 | 100 | 130 | 28 | 80  | 90 | 1 | 2 | 2 |
| 36.8 | 70  | 50  | 165 | 22 | 100 | 80 | 1 | 1 | 1 |
| 38.1 | 70  | 50  | 140 | 48 | 100 | 81 | 1 | 1 | 1 |
| 35.2 | 128 | 91  | 132 | 44 | 100 | 45 | 3 | 1 | 2 |
| 36.8 | 90  | 60  | 116 | 28 | 100 | 60 | 1 | 1 | 2 |
| 36.2 | 110 | 70  | 96  | 16 | 100 | 90 | 3 | 1 | 2 |
| 39   | 100 | 60  | 118 | 22 | 100 | 81 | 3 | 1 | 2 |
| 32   | 86  | 58  | 50  | 20 | 100 | 86 | 3 | 1 | 2 |
| 36.3 | 100 | 60  | 120 | 42 | 80  | 78 | 3 | 2 | 2 |
| 35   | 104 | 64  | 94  | 27 | 100 | 86 | 3 | 1 | 2 |
| 36.1 | 120 | 70  | 106 | 21 | 94  | 88 | 3 | 2 | 2 |
| 35.8 | 110 | 89  | 97  | 16 | 90  | 84 | 1 | 2 | 2 |
| 40.2 | 100 | 60  | 168 | 40 | 80  | 87 | 1 | 2 | 1 |
| 36.1 | 110 | 60  | 97  | 17 | 90  | 88 | 1 | 2 | 2 |
| 35.5 | 80  | 50  | 90  | 28 | 100 | 93 | 2 | 1 | 2 |
| 36   | 100 | 70  | 100 | 28 | 80  | 94 | 1 | 1 | 2 |
| 37.8 | 113 | 56  | 120 | 38 | 100 | 76 | 1 | 1 | 2 |
| 37.7 | 120 | 90  | 108 | 26 | 100 | 90 | 1 | 2 | 2 |
| 35.4 | 92  | 53  | 96  | 24 | 100 | 96 | 1 | 2 | 2 |
| 35.6 | 130 | 70  | 94  | 24 | 80  | 96 | 1 | 2 | 2 |
| 35.8 | 120 | 80  | 108 | 24 | 80  | 87 | 3 | 1 | 2 |
| 35.9 | 120 | 70  | 94  | 28 | 100 | 92 | 2 | 2 | 1 |
| 36.7 | 110 | 60  | 90  | 22 | 100 | 93 | 3 | 2 | 1 |
| 36.3 | 150 | 100 | 124 | 32 | 60  | 85 | 1 | 2 | 2 |
| 36   | 130 | 70  | 105 | 22 | 80  | 92 | 1 | 2 | 2 |
| 36   | 125 | 90  | 106 | 38 | 100 | 56 | 3 | 1 | 2 |
| 38.8 | 140 | 60  | 130 | 55 | 100 | 65 | 1 | 2 | 1 |
| 38.2 | 100 | 70  | 120 | 36 | 100 | 84 | 3 | 1 | 2 |
| 39   | 120 | 70  | 146 | 48 | 80  | 58 | 3 | 1 | 1 |
| 38.4 | 108 | 63  | 114 | 20 | 100 | 83 | 3 | 1 | 2 |
| 37.5 | 90  | 50  | 120 | 30 | 100 | 86 | 1 | 1 | 1 |
| 36.3 | 80  | 50  | 108 | 26 | 100 | 89 | 1 | 2 | 2 |
| 39   | 90  | 54  | 80  | 15 | 80  | 86 | 1 | 2 | 2 |
| 36   | 110 | 70  | 100 | 12 | 100 | 76 | 2 | 2 | 1 |
| 36.1 | 187 | 112 | 140 | 72 | 100 | 52 | 3 | 1 | 1 |
| 36.7 | 98  | 50  | 91  | 24 | 100 | 80 | 1 | 2 | 1 |
| 37   | 100 | 60  | 81  | 20 | 80  | 86 | 3 | 1 | 2 |
| 37.7 | 100 | 50  | 78  | 34 | 90  | 78 | 1 | 2 | 2 |
| 39   | 180 | 110 | 130 | 48 | 40  | 88 | 1 | 2 | 1 |
| 36.9 | 110 | 60  | 75  | 24 | 100 | 86 | 1 | 1 | 2 |
| 36.1 | 98  | 62  | 84  | 36 | 80  | 75 | 3 | 1 | 2 |
| 36.3 | 80  | 40  | 72  | 20 | 100 | 73 | 1 | 1 | 1 |

|      |     |     |     |    |     |    |   |   |   |
|------|-----|-----|-----|----|-----|----|---|---|---|
| 36.2 | 140 | 80  | 108 | 32 | 95  | 56 | 3 | 1 | 2 |
| 37   | 120 | 70  | 92  | 20 | 100 | 88 | 3 | 2 | 2 |
| 37   | 80  | 50  | 92  | 37 | 60  | 80 | 3 | 1 | 2 |
| 35.8 | 110 | 70  | 88  | 18 | 100 | 63 | 1 | 2 | 1 |
| 36.9 | 110 | 70  | 110 | 28 | 80  | 92 | 3 | 1 | 2 |
| 36   | 130 | 90  | 100 | 48 | 80  | 43 | 3 | 1 | 2 |
| 35.7 | 110 | 70  | 100 | 56 | 70  | 72 | 1 | 1 | 1 |
| 35   | 135 | 85  | 94  | 32 | 60  | 74 | 2 | 1 | 2 |
| 38.4 | 110 | 70  | 104 | 29 | 60  | 46 | 3 | 1 | 2 |
| 40   | 90  | 60  | 120 | 38 | 80  | 65 | 3 | 1 | 1 |
| 38   | 110 | 70  | 140 | 38 | 100 | 63 | 1 | 2 | 1 |
| 36   | 140 | 60  | 60  | 40 | 100 | 82 | 1 | 1 | 1 |
| 36   | 118 | 75  | 136 | 42 | 100 | 80 | 1 | 2 | 2 |
| 36   | 160 | 90  | 112 | 32 | 100 | 80 | 1 | 1 | 1 |
| 38.3 | 107 | 53  | 106 | 34 | 100 | 82 | 1 | 1 | 2 |
| 36.5 | 120 | 70  | 133 | 24 | 60  | 89 | 3 | 1 | 2 |
| 38.4 | 100 | 60  | 136 | 45 | 100 | 64 | 3 | 2 | 2 |
| 36   | 85  | 50  | 122 | 28 | 100 | 76 | 1 | 1 | 2 |
| 36.2 | 100 | 70  | 100 | 32 | 100 | 72 | 1 | 1 | 2 |
| 39   | 160 | 80  | 118 | 42 | 80  | 62 | 2 | 1 | 1 |
| 36   | 127 | 76  | 136 | 60 | 100 | 50 | 2 | 1 | 2 |
| 36.5 | 115 | 70  | 92  | 22 | 40  | 92 | 1 | 1 | 2 |
| 36.5 | 80  | 50  | 100 | 22 | 60  | 90 | 2 | 2 | 2 |
| 36.1 | 130 | 80  | 64  | 18 | 100 | 85 | 3 | 2 | 2 |
| 36.7 | 85  | 60  | 104 | 24 | 100 | 88 | 1 | 1 | 1 |
| 39   | 130 | 70  | 134 | 30 | 40  | 84 | 1 | 1 | 2 |
| 37.6 | 70  | 40  | 109 | 26 | 70  | 70 | 1 | 2 | 2 |
| 35   | 80  | 40  | 143 | 44 | 100 | 65 | 1 | 2 | 2 |
| 37   | 100 | 70  | 132 | 26 | 100 | 91 | 3 | 2 | 1 |
| 36.5 | 110 | 70  | 78  | 20 | 100 | 87 | 3 | 1 | 1 |
| 36.8 | 109 | 62  | 78  | 8  | 100 | 89 | 3 | 2 | 2 |
| 36   | 120 | 60  | 132 | 36 | 100 | 60 | 3 | 1 | 1 |
| 33.6 | 110 | 70  | 100 | 14 | 100 | 78 | 2 | 2 | 2 |
| 37.4 | 110 | 70  | 112 | 26 | 100 | 84 | 3 | 2 | 2 |
| 36.5 | 130 | 80  | 96  | 36 | 80  | 90 | 3 | 1 | 2 |
| 36.9 | 90  | 60  | 71  | 20 | 50  | 96 | 3 | 2 | 2 |
| 36.7 | 170 | 90  | 82  | 24 | 100 | 90 | 1 | 2 | 2 |
| 37.9 | 100 | 80  | 117 | 20 | 60  | 76 | 3 | 1 | 2 |
| 39.4 | 140 | 90  | 94  | 28 | 100 | 84 | 1 | 1 | 2 |
| 37.9 | 150 | 100 | 112 | 29 | 60  | 89 | 3 | 1 | 2 |
| 35.6 | 106 | 80  | 92  | 20 | 50  | 93 | 3 | 2 | 1 |
| 36.7 | 110 | 70  | 108 | 18 | 60  | 85 | 2 | 2 | 2 |
| 35.9 | 90  | 50  | 124 | 32 | 60  | 97 | 1 | 2 | 1 |
| 36.5 | 110 | 70  | 80  | 16 | 100 | 84 | 1 | 2 | 2 |
| 36.7 | 120 | 91  | 98  | 22 | 40  | 97 | 3 | 2 | 2 |
| 38.6 | 80  | 60  | 148 | 36 | 100 | 82 | 3 | 2 | 1 |
| 36.1 | 90  | 60  | 96  | 18 | 40  | 96 | 3 | 2 | 2 |

|      |     |     |     |    |     |    |   |   |   |
|------|-----|-----|-----|----|-----|----|---|---|---|
| 37   | 100 | 48  | 125 | 11 | 100 | 55 | 1 | 1 | 2 |
| 38.5 | 160 | 80  | 105 | 27 | 70  | 86 | 2 | 1 | 2 |
| 39   | 82  | 62  | 140 | 32 | 100 | 88 | 3 | 2 | 1 |
| 37.4 | 102 | 58  | 100 | 16 | 80  | 95 | 3 | 1 | 2 |
| 36   | 90  | 60  | 140 | 36 | 60  | 88 | 2 | 1 | 1 |
| 36.5 | 106 | 71  | 83  | 12 | 100 | 70 | 1 | 1 | 2 |
| 37   | 160 | 95  | 70  | 18 | 100 | 90 | 1 | 1 | 2 |
| 36.2 | 140 | 90  | 64  | 22 | 80  | 87 | 1 | 2 | 1 |
| 36   | 100 | 60  | 89  | 20 | 80  | 94 | 3 | 1 | 1 |
| 35.8 | 80  | 50  | 100 | 24 | 50  | 91 | 1 | 2 | 1 |
| 38   | 84  | 60  | 70  | 26 | 80  | 94 | 2 | 2 | 2 |
| 36   | 130 | 70  | 40  | 22 | 40  | 94 | 1 | 1 | 2 |
| 37   | 139 | 86  | 140 | 38 | 40  | 84 | 3 | 1 | 1 |
| 36.5 | 157 | 89  | 129 | 22 | 50  | 92 | 2 | 2 | 2 |
| 36   | 110 | 70  | 100 | 28 | 80  | 65 | 3 | 2 | 2 |
| 37   | 100 | 70  | 101 | 24 | 50  | 92 | 3 | 2 | 2 |
| 37.4 | 100 | 70  | 134 | 24 | 40  | 82 | 1 | 1 | 2 |
| 36   | 90  | 60  | 123 | 22 | 50  | 92 | 3 | 2 | 2 |
| 35.9 | 83  | 56  | 90  | 20 | 60  | 90 | 3 | 1 | 1 |
| 37.2 | 180 | 140 | 73  | 34 | 80  | 70 | 3 | 2 | 2 |
| 38.7 | 80  | 40  | 115 | 31 | 100 | 72 | 3 | 2 | 1 |
| 35.9 | 100 | 70  | 86  | 22 | 40  | 96 | 3 | 2 | 2 |
| 37.8 | 104 | 64  | 100 | 34 | 60  | 83 | 3 | 2 | 1 |
| 36.1 | 100 | 70  | 91  | 36 | 60  | 71 | 3 | 1 | 1 |
| 37.8 | 110 | 60  | 97  | 23 | 40  | 94 | 3 | 2 | 1 |
| 36.8 | 103 | 77  | 112 | 50 | 60  | 80 | 2 | 1 | 2 |
| 39.3 | 80  | 50  | 155 | 30 | 50  | 90 | 2 | 2 | 1 |
| 38   | 96  | 58  | 104 | 48 | 80  | 88 | 1 | 2 | 2 |
| 36.5 | 138 | 74  | 100 | 21 | 40  | 93 | 3 | 1 | 2 |
| 36.4 | 100 | 60  | 60  | 22 | 40  | 74 | 1 | 1 | 2 |
| 37.4 | 90  | 50  | 78  | 28 | 50  | 79 | 3 | 1 | 2 |
| 35.3 | 106 | 70  | 70  | 20 | 50  | 92 | 2 | 1 | 2 |
| 36.8 | 116 | 83  | 86  | 22 | 60  | 94 | 1 | 2 | 2 |
| 37   | 75  | 47  | 129 | 35 | 80  | 82 | 1 | 1 | 1 |
| 34   | 110 | 70  | 100 | 42 | 100 | 80 | 3 | 2 | 1 |
| 36.8 | 140 | 120 | 137 | 28 | 100 | 56 | 3 | 1 | 1 |
| 37.4 | 100 | 60  | 120 | 28 | 60  | 92 | 1 | 2 | 2 |
| 36.4 | 118 | 70  | 150 | 32 | 40  | 93 | 3 | 2 | 2 |
| 35.8 | 119 | 68  | 91  | 22 | 40  | 92 | 2 | 2 | 2 |
| 36   | 109 | 60  | 86  | 28 | 60  | 79 | 1 | 2 | 2 |
| 35.9 | 120 | 80  | 130 | 24 | 50  | 90 | 3 | 1 | 2 |
| 36   | 130 | 70  | 120 | 18 | 60  | 92 | 2 | 1 | 2 |
| 38   | 198 | 140 | 120 | 12 | 80  | 60 | 2 | 2 | 1 |
| 37.2 | 120 | 80  | 112 | 18 | 60  | 91 | 1 | 1 | 1 |
| 38.3 | 140 | 60  | 80  | 68 | 100 | 80 | 1 | 2 | 1 |
| 36   | 120 | 80  | 92  | 36 | 100 | 80 | 1 | 1 | 1 |
| 36.5 | 110 | 70  | 88  | 38 | 60  | 85 | 1 | 1 | 1 |

|      |     |     |     |    |     |    |   |   |   |
|------|-----|-----|-----|----|-----|----|---|---|---|
| 38.6 | 100 | 60  | 150 | 40 | 80  | 70 | 3 | 1 | 2 |
| 39.4 | 140 | 100 | 100 | 42 | 60  | 82 | 3 | 1 | 1 |
| 39.2 | 100 | 70  | 90  | 10 | 100 | 48 | 1 | 1 | 2 |
| 40   | 120 | 80  | 100 | 24 | 80  | 92 | 3 | 2 | 2 |
| 37.5 | 113 | 73  | 98  | 20 | 60  | 84 | 3 | 2 | 2 |
| 36.3 | 110 | 60  | 105 | 18 | 40  | 89 | 1 | 2 | 2 |
| 36.2 | 130 | 80  | 86  | 28 | 50  | 87 | 3 | 2 | 2 |
| 37.4 | 137 | 89  | 132 | 32 | 40  | 98 | 2 | 2 | 2 |
| 36.3 | 119 | 77  | 100 | 30 | 60  | 84 | 2 | 1 | 2 |
| 36   | 110 | 70  | 100 | 40 | 100 | 40 | 3 | 2 | 1 |
| 34   | 110 | 70  | 100 | 41 | 100 | 63 | 1 | 2 | 1 |
| 36.3 | 100 | 58  | 78  | 22 | 80  | 75 | 1 | 2 | 2 |
| 36   | 110 | 70  | 84  | 20 | 60  | 80 | 1 | 2 | 2 |
| 36.3 | 110 | 60  | 90  | 18 | 40  | 86 | 1 | 2 | 2 |
| 39.2 | 128 | 72  | 74  | 42 | 100 | 58 | 3 | 1 | 2 |
| 37   | 130 | 70  | 88  | 30 | 80  | 62 | 3 | 1 | 2 |
| 36   | 127 | 67  | 76  | 12 | 60  | 81 | 1 | 2 | 2 |
| 35.8 | 115 | 78  | 80  | 20 | 60  | 80 | 3 | 1 | 2 |
| 36.7 | 112 | 68  | 79  | 22 | 40  | 87 | 1 | 2 | 2 |
| 36.8 | 130 | 70  | 86  | 20 | 40  | 84 | 3 | 2 | 2 |
| 36.4 | 125 | 76  | 94  | 22 | 50  | 76 | 3 | 2 | 2 |
| 40.2 | 140 | 90  | 66  | 38 | 70  | 63 | 3 | 1 | 2 |
| 39.3 | 100 | 70  | 78  | 34 | 60  | 77 | 3 | 1 | 2 |
| 37   | 112 | 68  | 90  | 22 | 50  | 80 | 1 | 2 | 2 |
| 37.1 | 128 | 63  | 86  | 20 | 40  | 90 | 2 | 2 | 2 |
| 37.8 | 116 | 65  | 82  | 16 | 60  | 89 | 1 | 2 | 2 |
| 36.7 | 123 | 74  | 78  | 20 | 40  | 84 | 3 | 2 | 2 |
| 35.7 | 190 | 145 | 103 | 6  | 100 | 65 | 1 | 2 | 2 |
| 36   | 140 | 80  | 76  | 18 | 60  | 84 | 1 | 2 | 2 |
| 32.8 | 129 | 75  | 68  | 12 | 80  | 83 | 2 | 1 | 2 |
| 35.7 | 205 | 185 | 118 | 18 | 70  | 85 | 3 | 2 | 2 |
| 36.7 | 140 | 88  | 122 | 20 | 40  | 84 | 3 | 2 | 2 |
| 35.6 | 128 | 62  | 109 | 22 | 100 | 75 | 1 | 2 | 2 |
| 37.8 | 130 | 70  | 120 | 20 | 100 | 90 | 3 | 2 | 2 |
| 35.6 | 115 | 78  | 100 | 22 | 70  | 62 | 1 | 1 | 2 |
| 37.2 | 190 | 83  | 118 | 8  | 100 | 58 | 1 | 2 | 2 |
| 36   | 180 | 115 | 130 | 12 | 100 | 74 | 1 | 2 | 2 |
| 34.3 | 118 | 62  | 128 | 18 | 60  | 80 | 1 | 2 | 2 |
| 33.8 | 80  | 50  | 134 | 16 | 80  | 83 | 1 | 2 | 2 |
| 37.5 | 119 | 70  | 110 | 13 | 80  | 90 | 1 | 1 | 2 |
| 36   | 140 | 100 | 115 | 22 | 60  | 81 | 1 | 2 | 1 |
| 35.3 | 110 | 73  | 120 | 22 | 50  | 86 | 3 | 2 | 2 |
| 36.3 | 125 | 67  | 132 | 18 | 80  | 80 | 1 | 2 | 2 |
| 35.5 | 130 | 80  | 114 | 20 | 60  | 78 | 2 | 2 | 2 |
| 34.8 | 80  | 50  | 110 | 12 | 100 | 63 | 1 | 1 | 2 |
| 35.7 | 140 | 90  | 84  | 20 | 80  | 88 | 3 | 1 | 2 |
| 35.9 | 135 | 78  | 90  | 18 | 60  | 80 | 2 | 1 | 2 |



|      |     |     |     |    |     |    |   |   |   |
|------|-----|-----|-----|----|-----|----|---|---|---|
| 36.5 | 132 | 80  | 80  | 22 | 100 | 58 | 1 | 2 | 2 |
| 37   | 180 | 120 | 136 | 10 | 100 | 66 | 1 | 2 | 2 |
| 36.8 | 209 | 184 | 140 | 12 | 80  | 86 | 1 | 1 | 2 |
| 36   | 130 | 90  | 136 | 18 | 60  | 83 | 1 | 2 | 2 |
| 37   | 128 | 62  | 104 | 14 | 80  | 83 | 1 | 2 | 2 |
| 36.8 | 190 | 154 | 142 | 16 | 100 | 78 | 1 | 2 | 2 |
| 36.6 | 202 | 185 | 128 | 20 | 100 | 74 | 1 | 2 | 1 |
| 36   | 110 | 70  | 100 | 40 | 100 | 40 | 3 | 2 | 1 |
| 34   | 110 | 70  | 100 | 41 | 100 | 63 | 1 | 2 | 1 |
| 36.3 | 100 | 58  | 78  | 22 | 80  | 75 | 1 | 2 | 2 |
| 37   | 110 | 80  | 86  | 20 | 60  | 80 | 1 | 2 | 2 |
| 36.4 | 110 | 60  | 90  | 18 | 40  | 86 | 1 | 2 | 2 |
| 39   | 128 | 72  | 74  | 42 | 100 | 58 | 3 | 1 | 2 |
| 37   | 130 | 80  | 82  | 32 | 80  | 62 | 3 | 1 | 2 |
| 36   | 120 | 67  | 78  | 12 | 60  | 81 | 1 | 2 | 2 |
| 35   | 115 | 74  | 80  | 20 | 60  | 80 | 3 | 1 | 2 |
| 36.7 | 112 | 69  | 82  | 22 | 40  | 87 | 1 | 2 | 2 |
| 36.9 | 130 | 70  | 84  | 20 | 40  | 84 | 3 | 2 | 2 |
| 36.2 | 125 | 76  | 94  | 22 | 50  | 76 | 3 | 2 | 2 |
| 39.3 | 140 | 90  | 76  | 38 | 70  | 63 | 3 | 1 | 2 |
| 38.9 | 100 | 70  | 78  | 34 | 60  | 81 | 3 | 1 | 2 |
| 36.2 | 116 | 71  | 90  | 22 | 50  | 80 | 1 | 2 | 2 |
| 37.1 | 128 | 63  | 86  | 20 | 40  | 90 | 2 | 2 | 2 |
| 37.8 | 116 | 65  | 82  | 16 | 60  | 89 | 1 | 2 | 2 |
| 36.7 | 123 | 74  | 78  | 20 | 40  | 84 | 3 | 2 | 2 |
| 35.7 | 190 | 145 | 103 | 6  | 100 | 65 | 1 | 2 | 2 |
| 36   | 140 | 80  | 76  | 18 | 60  | 84 | 1 | 2 | 2 |
| 32.8 | 129 | 75  | 68  | 12 | 80  | 83 | 2 | 1 | 2 |
| 35.7 | 205 | 185 | 118 | 18 | 70  | 85 | 3 | 2 | 2 |
| 36.7 | 140 | 88  | 122 | 20 | 40  | 84 | 3 | 2 | 2 |
| 35.3 | 128 | 62  | 109 | 22 | 100 | 75 | 1 | 2 | 2 |
| 37.8 | 130 | 70  | 120 | 20 | 100 | 90 | 3 | 2 | 2 |
| 35.6 | 115 | 78  | 100 | 22 | 70  | 62 | 1 | 1 | 2 |
| 37.2 | 190 | 83  | 118 | 8  | 100 | 58 | 1 | 2 | 2 |
| 36   | 180 | 115 | 130 | 12 | 100 | 74 | 1 | 2 | 2 |
| 34.3 | 118 | 62  | 128 | 18 | 60  | 80 | 1 | 2 | 2 |
| 33.8 | 80  | 50  | 134 | 16 | 80  | 83 | 1 | 2 | 2 |
| 37.5 | 119 | 78  | 110 | 13 | 80  | 90 | 1 | 1 | 2 |
| 36   | 140 | 100 | 115 | 22 | 60  | 81 | 1 | 2 | 1 |
| 35.2 | 110 | 73  | 120 | 22 | 50  | 86 | 3 | 2 | 2 |
| 36.3 | 125 | 67  | 132 | 18 | 80  | 80 | 1 | 2 | 2 |
| 35.5 | 130 | 80  | 114 | 20 | 60  | 78 | 2 | 2 | 2 |
| 34.8 | 80  | 50  | 110 | 12 | 100 | 63 | 1 | 1 | 2 |
| 35.7 | 140 | 90  | 84  | 20 | 80  | 88 | 3 | 1 | 2 |
| 35.9 | 135 | 78  | 90  | 18 | 60  | 80 | 2 | 1 | 2 |
| 36.5 | 132 | 80  | 80  | 22 | 100 | 58 | 1 | 2 | 2 |
| 37   | 180 | 120 | 136 | 10 | 100 | 66 | 1 | 2 | 2 |

|      |     |     |     |    |     |    |   |   |   |
|------|-----|-----|-----|----|-----|----|---|---|---|
| 36.8 | 209 | 184 | 140 | 12 | 80  | 86 | 1 | 1 | 2 |
| 36   | 130 | 90  | 136 | 18 | 60  | 83 | 1 | 2 | 2 |
| 37   | 128 | 62  | 104 | 14 | 80  | 83 | 2 | 2 | 2 |
| 36.8 | 190 | 157 | 142 | 16 | 100 | 78 | 1 | 2 | 2 |
| 36.6 | 202 | 185 | 128 | 20 | 100 | 74 | 1 | 2 | 1 |
| 36.5 | 130 | 75  | 108 | 28 | 100 | 86 | 3 | 2 | 2 |
| 36.6 | 104 | 68  | 94  | 24 | 40  | 96 | 3 | 2 | 2 |
| 36   | 109 | 60  | 91  | 18 | 95  | 94 | 1 | 2 | 2 |
| 35.9 | 90  | 60  | 124 | 22 | 90  | 96 | 1 | 2 | 2 |
| 37.4 | 92  | 52  | 134 | 18 | 100 | 99 | 1 | 2 | 1 |
| 35   | 90  | 50  | 120 | 26 | 90  | 93 | 1 | 2 | 2 |
| 36.3 | 100 | 70  | 98  | 24 | 70  | 96 | 3 | 2 | 2 |
| 37   | 100 | 60  | 78  | 18 | 50  | 90 | 3 | 2 | 1 |
| 37.6 | 140 | 80  | 112 | 40 | 95  | 93 | 3 | 1 | 2 |
| 34.2 | 129 | 88  | 86  | 15 | 40  | 95 | 2 | 1 | 2 |
| 35   | 100 | 60  | 82  | 26 | 40  | 70 | 3 | 1 | 1 |
| 37.8 | 150 | 100 | 140 | 38 | 100 | 70 | 1 | 2 | 2 |
| 36.1 | 90  | 60  | 80  | 28 | 100 | 80 | 1 | 1 | 1 |
| 37   | 140 | 70  | 84  | 48 | 80  | 84 | 3 | 1 | 2 |
| 38.3 | 120 | 70  | 68  | 30 | 100 | 91 | 1 | 2 | 2 |
| 37   | 100 | 70  | 92  | 20 | 100 | 92 | 3 | 2 | 2 |
| 35   | 72  | 39  | 82  | 13 | 100 | 60 | 1 | 2 | 1 |
| 35.7 | 90  | 56  | 139 | 28 | 70  | 83 | 1 | 1 | 2 |
| 36.6 | 160 | 110 | 89  | 28 | 100 | 68 | 1 | 2 | 1 |
| 34   | 90  | 60  | 120 | 5  | 100 | 72 | 1 | 2 | 2 |
| 36   | 140 | 80  | 110 | 29 | 90  | 78 | 3 | 1 | 2 |
| 35.8 | 140 | 70  | 110 | 42 | 100 | 40 | 3 | 1 | 2 |
| 39.4 | 120 | 80  | 119 | 22 | 90  | 80 | 2 | 1 | 2 |
| 36.7 | 90  | 60  | 86  | 24 | 70  | 85 | 3 | 2 | 2 |
| 36.4 | 132 | 70  | 82  | 30 | 100 | 70 | 1 | 2 | 1 |
| 36   | 130 | 70  | 124 | 20 | 100 | 91 | 3 | 2 | 2 |
| 34.3 | 70  | 40  | 108 | 5  | 100 | 68 | 1 | 2 | 1 |
| 36.5 | 120 | 80  | 80  | 40 | 100 | 70 | 3 | 1 | 2 |
| 34.8 | 130 | 75  | 62  | 10 | 100 | 64 | 1 | 2 | 1 |
| 36.3 | 110 | 70  | 98  | 32 | 100 | 87 | 2 | 2 | 2 |
| 37   | 83  | 62  | 109 | 28 | 100 | 96 | 1 | 1 | 1 |
| 39.2 | 90  | 50  | 140 | 44 | 100 | 47 | 2 | 1 | 1 |
| 37.1 | 85  | 50  | 106 | 45 | 100 | 79 | 3 | 1 | 1 |
| 34   | 110 | 70  | 123 | 28 | 100 | 81 | 1 | 2 | 2 |
| 36.5 | 110 | 60  | 88  | 22 | 100 | 90 | 3 | 2 | 2 |
| 37.2 | 80  | 50  | 112 | 34 | 100 | 60 | 3 | 1 | 1 |
| 37.6 | 90  | 50  | 108 | 34 | 100 | 82 | 3 | 1 | 2 |
| 37.2 | 90  | 60  | 92  | 32 | 60  | 86 | 1 | 1 | 2 |
| 38.7 | 90  | 60  | 120 | 30 | 80  | 87 | 1 | 1 | 1 |
| 33   | 110 | 70  | 100 | 39 | 100 | 80 | 1 | 1 | 1 |
| 38   | 118 | 65  | 121 | 27 | 100 | 91 | 1 | 1 | 2 |
| 36.5 | 150 | 100 | 130 | 28 | 80  | 90 | 1 | 2 | 2 |

|      |     |     |     |    |     |    |   |   |   |
|------|-----|-----|-----|----|-----|----|---|---|---|
| 36.8 | 70  | 50  | 165 | 22 | 100 | 80 | 1 | 1 | 1 |
| 35.2 | 128 | 91  | 132 | 44 | 100 | 45 | 3 | 1 | 2 |
| 36.8 | 90  | 60  | 116 | 28 | 100 | 60 | 1 | 1 | 2 |
| 36.2 | 110 | 70  | 96  | 16 | 100 | 90 | 3 | 1 | 2 |
| 35   | 104 | 64  | 94  | 27 | 100 | 86 | 3 | 1 | 2 |
| 35.8 | 110 | 89  | 97  | 16 | 90  | 94 | 1 | 2 | 2 |
| 36.1 | 110 | 60  | 97  | 17 | 90  | 85 | 1 | 2 | 2 |
| 35.5 | 80  | 50  | 90  | 28 | 100 | 93 | 2 | 2 | 2 |
| 36   | 100 | 70  | 100 | 28 | 80  | 94 | 1 | 1 | 2 |
| 37.7 | 120 | 90  | 108 | 26 | 100 | 90 | 1 | 2 | 2 |
| 35.6 | 130 | 70  | 94  | 24 | 80  | 96 | 1 | 2 | 2 |
| 35.8 | 120 | 80  | 108 | 24 | 80  | 87 | 3 | 1 | 2 |
| 35.9 | 120 | 70  | 94  | 28 | 100 | 92 | 2 | 2 | 1 |
| 36.6 | 150 | 100 | 124 | 32 | 60  | 85 | 1 | 2 | 2 |
| 36   | 125 | 90  | 106 | 38 | 100 | 56 | 3 | 1 | 2 |
| 38.8 | 140 | 60  | 130 | 55 | 100 | 65 | 1 | 2 | 1 |
| 39   | 120 | 70  | 146 | 48 | 100 | 58 | 3 | 1 | 1 |
| 38.4 | 108 | 63  | 114 | 20 | 100 | 83 | 3 | 1 | 2 |
| 37.5 | 90  | 50  | 120 | 30 | 100 | 86 | 1 | 1 | 1 |
| 36.3 | 80  | 50  | 108 | 26 | 100 | 89 | 1 | 2 | 2 |
| 39   | 90  | 54  | 80  | 15 | 80  | 86 | 1 | 2 | 2 |
| 36.1 | 187 | 112 | 140 | 72 | 100 | 52 | 3 | 1 | 1 |
| 36.7 | 98  | 50  | 91  | 24 | 100 | 80 | 1 | 2 | 1 |
| 37   | 100 | 60  | 81  | 20 | 80  | 86 | 3 | 1 | 2 |
| 37.7 | 100 | 50  | 78  | 34 | 90  | 78 | 1 | 2 | 2 |
| 36.9 | 110 | 60  | 75  | 24 | 100 | 86 | 1 | 1 | 2 |
| 37   | 80  | 50  | 92  | 38 | 60  | 80 | 3 | 1 | 2 |
| 35.8 | 110 | 70  | 88  | 18 | 100 | 63 | 1 | 2 | 1 |
| 36.9 | 110 | 70  | 110 | 28 | 80  | 92 | 3 | 1 | 2 |
| 35.7 | 110 | 70  | 100 | 56 | 70  | 72 | 1 | 1 | 1 |
| 35   | 135 | 85  | 94  | 32 | 60  | 74 | 2 | 1 | 2 |
| 38.4 | 135 | 85  | 104 | 38 | 100 | 46 | 1 | 1 | 2 |
| 36   | 118 | 71  | 136 | 42 | 100 | 80 | 1 | 2 | 2 |
| 36   | 160 | 90  | 112 | 32 | 100 | 80 | 1 | 1 | 1 |
| 38.3 | 107 | 53  | 106 | 34 | 100 | 82 | 1 | 1 | 2 |
| 39   | 160 | 80  | 118 | 42 | 80  | 62 | 2 | 1 | 1 |
| 36   | 127 | 76  | 136 | 60 | 100 | 50 | 2 | 1 | 2 |
| 36.7 | 85  | 60  | 104 | 24 | 100 | 88 | 1 | 1 | 1 |
| 35   | 80  | 40  | 143 | 44 | 100 | 65 | 1 | 2 | 2 |
| 36.7 | 170 | 90  | 82  | 24 | 100 | 90 | 1 | 2 | 2 |
| 39.4 | 140 | 90  | 94  | 28 | 100 | 84 | 1 | 1 | 2 |
| 35.6 | 106 | 80  | 92  | 20 | 50  | 93 | 3 | 2 | 2 |
| 36.5 | 110 | 70  | 80  | 16 | 100 | 84 | 1 | 2 | 2 |
| 38.5 | 160 | 80  | 105 | 27 | 70  | 86 | 2 | 1 | 2 |
| 37   | 160 | 95  | 70  | 18 | 100 | 90 | 1 | 1 | 2 |
| 36.2 | 140 | 90  | 64  | 22 | 80  | 87 | 1 | 2 | 1 |
| 38   | 84  | 60  | 70  | 26 | 80  | 94 | 2 | 2 | 2 |

|      |     |     |     |    |     |    |   |   |   |
|------|-----|-----|-----|----|-----|----|---|---|---|
| 36   | 130 | 70  | 40  | 22 | 40  | 94 | 1 | 1 | 2 |
| 37   | 100 | 70  | 101 | 24 | 50  | 92 | 3 | 2 | 2 |
| 37.4 | 100 | 70  | 134 | 24 | 40  | 82 | 1 | 1 | 2 |
| 36.1 | 100 | 70  | 91  | 36 | 60  | 71 | 3 | 1 | 1 |
| 36.5 | 138 | 74  | 100 | 21 | 40  | 93 | 3 | 1 | 2 |
| 37.4 | 90  | 50  | 78  | 28 | 50  | 79 | 3 | 1 | 2 |
| 35.3 | 106 | 70  | 70  | 20 | 50  | 92 | 2 | 1 | 2 |
| 34   | 110 | 70  | 100 | 42 | 100 | 80 | 3 | 2 | 1 |
| 36.8 | 140 | 120 | 137 | 28 | 100 | 56 | 3 | 1 | 1 |
| 37.4 | 100 | 60  | 120 | 28 | 60  | 92 | 1 | 2 | 2 |
| 35.8 | 119 | 68  | 91  | 22 | 40  | 92 | 2 | 2 | 2 |
| 36   | 109 | 69  | 86  | 28 | 60  | 79 | 1 | 2 | 2 |
| 38   | 198 | 140 | 120 | 12 | 80  | 60 | 2 | 2 | 1 |
| 37.2 | 120 | 80  | 112 | 18 | 60  | 91 | 1 | 1 | 1 |
| 38.6 | 100 | 60  | 100 | 40 | 80  | 70 | 1 | 1 | 2 |
| 37.5 | 113 | 73  | 98  | 20 | 60  | 84 | 3 | 2 | 2 |

| Outcome | HRcat | SpO2cat | SBpcat | tempraturecat | pltcat | Agecat1 | Dxcat | GCScat1 | ICUWcat1 |
|---------|-------|---------|--------|---------------|--------|---------|-------|---------|----------|
| 0       | 3     | 1       | 2      | 2             | 4      | 4       | 6     | 3       | 3        |
| 0       | 3     | 1       | 2      | 2             | 4      | 4       | 6     | 3       | 3        |
| 0       | 3     | 2       | 2      | 2             | 4      | 1       | 1     | 3       | 3        |
| 1       | 2     | 2       | 2      | 2             | 4      | 1       | 9     | 3       | 3        |
| 0       | 3     | 1       | 3      | 2             | 4      | 1       | 1     | 3       | 2        |
| 0       | 2     | 2       | 2      | 2             | 1      | 1       | 6     | 1       | 3        |
| 1       | 3     | 2       | 2      | 2             | 2      | 3       | 3     | 1       | 3        |
| 1       | 3     | 2       | 2      | 2             | 3      | 1       | 7     | 1       | 1        |
| 1       | 3     | 2       | 2      | 1             | 4      | 3       | 9     | 1       | 3        |
| 1       | 2     | 2       | 2      | 2             | 4      | 3       | 9     | 3       | 3        |
| 1       | 2     | 2       | 2      | 2             | 4      | 2       | 5     | 3       | 1        |
| 1       | 3     | 2       | 3      | 2             | 4      | 4       | 9     | 3       | 3        |
| 1       | 3     | 2       | 2      | 2             | 3      | 1       | 5     | 3       | 2        |
| 1       | 2     | 2       | 2      | 1             | 4      | 2       | 3     | 2       | 3        |
| 1       | 2     | 1       | 2      | 1             | 4      | 2       | 6     | 1       | 3        |
| 0       | 3     | 1       | 3      | 2             | 4      | 1       | 6     | 1       | 1        |
| 0       | 3     | 1       | 2      | 2             | 4      | 1       | 1     | 3       | 2        |
| 1       | 2     | 1       | 2      | 2             | 4      | 1       | 1     | 1       | 2        |
| 1       | 2     | 1       | 3      | 2             | 4      | 3       | 9     | 3       | 2        |
| 1       | 3     | 1       | 2      | 3             | 2      | 1       | 1     | 2       | 2        |
| 0       | 2     | 2       | 2      | 3             | 4      | 1       | 6     | 1       | 1        |
| 1       | 2     | 2       | 2      | 1             | 4      | 1       | 7     | 3       | 3        |
| 1       | 2     | 1       | 1      | 1             | 4      | 1       | 8     | 1       | 1        |
| 0       | 3     | 1       | 2      | 2             | 4      | 1       | 1     | 1       | 3        |
| 1       | 2     | 1       | 3      | 2             | 1      | 1       | 6     | 1       | 1        |
| 0       | 3     | 1       | 2      | 1             | 4      | 1       | 6     | 1       | 3        |
| 0       | 3     | 1       | 3      | 2             | 1      | 2       | 9     | 3       | 3        |
| 0       | 3     | 1       | 3      | 2             | 4      | 3       | 1     | 3       | 3        |
| 1       | 3     | 1       | 2      | 3             | 4      | 1       | 9     | 2       | 3        |
| 1       | 2     | 1       | 2      | 2             | 4      | 1       | 8     | 2       | 3        |
| 1       | 2     | 1       | 2      | 2             | 1      | 2       | 1     | 1       | 3        |
| 1       | 2     | 1       | 2      | 2             | 4      | 1       | 4     | 1       | 2        |
| 1       | 3     | 2       | 2      | 2             | 4      | 1       | 9     | 3       | 3        |
| 1       | 3     | 1       | 1      | 1             | 4      | 1       | 4     | 1       | 1        |
| 1       | 3     | 2       | 2      | 2             | 4      | 1       | 9     | 3       | 2        |
| 1       | 2     | 1       | 2      | 2             | 3      | 4       | 1     | 3       | 3        |
| 0       | 2     | 1       | 2      | 1             | 4      | 1       | 6     | 1       | 1        |
| 0       | 2     | 1       | 2      | 2             | 3      | 4       | 7     | 2       | 2        |
| 0       | 3     | 2       | 1      | 2             | 3      | 1       | 8     | 1       | 1        |
| 1       | 3     | 1       | 2      | 3             | 3      | 2       | 1     | 2       | 1        |
| 1       | 3     | 1       | 1      | 2             | 4      | 1       | 8     | 1       | 1        |
| 0       | 3     | 1       | 2      | 2             | 2      | 3       | 1     | 3       | 2        |
| 1       | 3     | 1       | 2      | 1             | 4      | 1       | 6     | 1       | 2        |
| 0       | 2     | 2       | 2      | 2             | 4      | 1       | 6     | 3       | 2        |
| 0       | 2     | 1       | 2      | 2             | 4      | 1       | 1     | 3       | 1        |
| 1       | 3     | 1       | 1      | 2             | 4      | 3       | 1     | 3       | 1        |

|   |   |   |   |   |   |   |   |   |   |
|---|---|---|---|---|---|---|---|---|---|
| 1 | 3 | 1 | 2 | 2 | 4 | 1 | 1 | 3 | 3 |
| 0 | 2 | 1 | 2 | 2 | 4 | 1 | 1 | 2 | 3 |
| 1 | 3 | 1 | 1 | 3 | 4 | 1 | 6 | 1 | 1 |
| 1 | 1 | 1 | 1 | 1 | 4 | 1 | 6 | 1 | 1 |
| 1 | 3 | 2 | 2 | 3 | 4 | 2 | 8 | 3 | 3 |
| 1 | 3 | 2 | 3 | 2 | 4 | 1 | 8 | 1 | 3 |
| 1 | 3 | 1 | 1 | 2 | 4 | 1 | 8 | 1 | 1 |
| 1 | 3 | 1 | 1 | 3 | 4 | 1 | 8 | 1 | 2 |
| 0 | 3 | 1 | 2 | 1 | 4 | 1 | 1 | 3 | 3 |
| 0 | 3 | 1 | 2 | 2 | 4 | 1 | 9 | 1 | 3 |
| 0 | 2 | 2 | 2 | 2 | 4 | 2 | 4 | 3 | 2 |
| 1 | 3 | 1 | 2 | 3 | 4 | 1 | 1 | 3 | 3 |
| 1 | 1 | 1 | 1 | 1 | 4 | 1 | 7 | 3 | 3 |
| 0 | 3 | 1 | 2 | 2 | 4 | 1 | 9 | 3 | 2 |
| 0 | 2 | 1 | 2 | 1 | 2 | 6 | 1 | 3 | 3 |
| 1 | 3 | 1 | 2 | 2 | 4 | 1 | 1 | 3 | 2 |
| 0 | 2 | 1 | 2 | 2 | 3 | 2 | 1 | 1 | 3 |
| 1 | 3 | 1 | 2 | 3 | 4 | 1 | 1 | 1 | 1 |
| 0 | 2 | 1 | 2 | 2 | 4 | 2 | 7 | 1 | 3 |
| 0 | 2 | 2 | 1 | 2 | 4 | 1 | 1 | 2 | 3 |
| 1 | 3 | 2 | 2 | 2 | 2 | 1 | 1 | 1 | 3 |
| 1 | 3 | 1 | 2 | 2 | 4 | 1 | 4 | 1 | 1 |
| 1 | 3 | 2 | 2 | 2 | 4 | 1 | 8 | 1 | 3 |
| 0 | 2 | 2 | 2 | 1 | 4 | 1 | 7 | 1 | 3 |
| 0 | 2 | 2 | 2 | 2 | 4 | 3 | 1 | 1 | 3 |
| 1 | 3 | 1 | 2 | 2 | 4 | 3 | 4 | 3 | 2 |
| 1 | 2 | 2 | 2 | 2 | 4 | 4 | 4 | 2 | 2 |
| 1 | 2 | 2 | 2 | 2 | 4 | 1 | 1 | 3 | 1 |
| 1 | 3 | 1 | 3 | 2 | 2 | 4 | 6 | 1 | 3 |
| 1 | 3 | 2 | 2 | 2 | 3 | 1 | 7 | 1 | 2 |
| 0 | 3 | 1 | 2 | 2 | 4 | 2 | 1 | 3 | 3 |
| 0 | 3 | 1 | 3 | 3 | 4 | 1 | 9 | 1 | 1 |
| 1 | 3 | 1 | 2 | 3 | 3 | 1 | 2 | 3 | 3 |
| 1 | 3 | 1 | 2 | 3 | 4 | 4 | 1 | 3 | 1 |
| 1 | 3 | 1 | 2 | 3 | 2 | 1 | 1 | 3 | 1 |
| 1 | 3 | 1 | 2 | 2 | 3 | 1 | 1 | 1 | 1 |
| 1 | 3 | 1 | 1 | 2 | 4 | 2 | 6 | 1 | 3 |
| 1 | 2 | 1 | 2 | 3 | 4 | 4 | 1 | 1 | 3 |
| 1 | 1 | 1 | 1 | 2 | 4 | 1 | 7 | 2 | 1 |
| 1 | 3 | 1 | 3 | 2 | 4 | 1 | 1 | 3 | 1 |
| 1 | 2 | 1 | 2 | 2 | 4 | 2 | 9 | 1 | 1 |
| 1 | 2 | 1 | 2 | 2 | 4 | 3 | 1 | 3 | 3 |
| 1 | 2 | 1 | 2 | 2 | 2 | 4 | 4 | 1 | 2 |
| 0 | 3 | 1 | 3 | 3 | 3 | 1 | 4 | 1 | 2 |
| 0 | 2 | 1 | 2 | 2 | 2 | 1 | 6 | 1 | 3 |
| 0 | 2 | 1 | 2 | 2 | 1 | 1 | 4 | 3 | 2 |
| 0 | 2 | 1 | 1 | 2 | 4 | 1 | 8 | 1 | 1 |

|   |   |   |   |   |   |   |   |   |   |
|---|---|---|---|---|---|---|---|---|---|
| 1 | 3 | 1 | 3 | 2 | 4 | 1 | 1 | 3 | 1 |
| 1 | 2 | 1 | 2 | 2 | 4 | 1 | 8 | 3 | 1 |
| 1 | 2 | 1 | 1 | 2 | 1 | 4 | 1 | 3 | 3 |
| 0 | 2 | 1 | 1 | 2 | 3 | 1 | 6 | 1 | 1 |
| 1 | 3 | 2 | 2 | 2 | 4 | 1 | 1 | 3 | 3 |
| 0 | 3 | 1 | 2 | 2 | 4 | 1 | 1 | 3 | 2 |
| 0 | 1 | 1 | 1 | 2 | 4 | 2 | 4 | 1 | 1 |
| 0 | 2 | 1 | 2 | 1 | 4 | 3 | 1 | 2 | 3 |
| 1 | 3 | 1 | 2 | 3 | 4 | 2 | 1 | 3 | 3 |
| 1 | 3 | 1 | 2 | 3 | 3 | 1 | 4 | 3 | 1 |
| 1 | 3 | 1 | 2 | 3 | 4 | 2 | 1 | 1 | 1 |
| 1 | 2 | 1 | 3 | 2 | 4 | 2 | 8 | 1 | 1 |
| 1 | 3 | 1 | 2 | 2 | 4 | 1 | 8 | 1 | 3 |
| 1 | 3 | 1 | 3 | 2 | 4 | 3 | 1 | 1 | 1 |
| 0 | 3 | 1 | 2 | 3 | 4 | 1 | 6 | 1 | 3 |
| 1 | 3 | 1 | 2 | 2 | 4 | 1 | 9 | 3 | 3 |
| 1 | 3 | 1 | 2 | 3 | 4 | 1 | 1 | 3 | 2 |
| 0 | 3 | 1 | 1 | 2 | 4 | 1 | 9 | 1 | 2 |
| 1 | 3 | 1 | 2 | 2 | 4 | 2 | 8 | 1 | 2 |
| 1 | 3 | 1 | 3 | 3 | 2 | 4 | 1 | 2 | 2 |
| 1 | 3 | 1 | 2 | 2 | 4 | 3 | 1 | 2 | 2 |
| 0 | 2 | 2 | 2 | 2 | 4 | 1 | 9 | 1 | 2 |
| 0 | 1 | 2 | 1 | 2 | 4 | 2 | 7 | 2 | 2 |
| 1 | 2 | 1 | 2 | 2 | 3 | 3 | 3 | 3 | 3 |
| 1 | 3 | 1 | 1 | 2 | 4 | 1 | 1 | 1 | 1 |
| 0 | 3 | 1 | 2 | 3 | 4 | 1 | 1 | 1 | 3 |
| 1 | 3 | 1 | 1 | 2 | 3 | 1 | 9 | 1 | 2 |
| 0 | 3 | 1 | 1 | 1 | 4 | 1 | 8 | 1 | 3 |
| 0 | 3 | 2 | 2 | 2 | 4 | 2 | 7 | 3 | 1 |
| 1 | 2 | 1 | 2 | 2 | 2 | 1 | 4 | 3 | 2 |
| 1 | 2 | 1 | 2 | 2 | 4 | 1 | 7 | 3 | 3 |
| 1 | 3 | 1 | 2 | 2 | 4 | 3 | 1 | 3 | 1 |
| 0 | 1 | 1 | 1 | 1 | 1 | 1 | 9 | 2 | 1 |
| 0 | 3 | 1 | 2 | 2 | 4 | 1 | 7 | 3 | 3 |
| 0 | 2 | 2 | 2 | 2 | 3 | 1 | 1 | 3 | 3 |
| 1 | 2 | 2 | 2 | 2 | 4 | 1 | 2 | 3 | 3 |
| 0 | 2 | 2 | 3 | 2 | 4 | 4 | 6 | 1 | 2 |
| 1 | 3 | 1 | 2 | 2 | 2 | 1 | 3 | 3 | 3 |
| 1 | 2 | 1 | 3 | 3 | 2 | 3 | 6 | 1 | 2 |
| 0 | 3 | 1 | 3 | 2 | 2 | 2 | 9 | 3 | 3 |
| 1 | 2 | 2 | 2 | 2 | 3 | 2 | 9 | 3 | 1 |
| 0 | 3 | 1 | 2 | 2 | 3 | 1 | 8 | 2 | 3 |
| 1 | 3 | 2 | 2 | 2 | 3 | 1 | 8 | 1 | 1 |
| 1 | 2 | 1 | 2 | 2 | 4 | 4 | 8 | 1 | 3 |
| 0 | 2 | 2 | 2 | 2 | 3 | 1 | 4 | 3 | 3 |
| 0 | 3 | 1 | 1 | 3 | 4 | 3 | 4 | 3 | 1 |
| 0 | 2 | 2 | 2 | 2 | 4 | 4 | 4 | 3 | 3 |

|   |   |   |   |   |   |   |   |   |   |
|---|---|---|---|---|---|---|---|---|---|
| 1 | 3 | 1 | 2 | 2 | 4 | 3 | 1 | 1 | 3 |
| 1 | 3 | 1 | 3 | 3 | 4 | 3 | 8 | 2 | 3 |
| 0 | 3 | 1 | 1 | 3 | 2 | 1 | 7 | 3 | 1 |
| 0 | 3 | 2 | 2 | 2 | 4 | 1 | 9 | 3 | 2 |
| 1 | 3 | 1 | 2 | 2 | 4 | 1 | 4 | 2 | 1 |
| 1 | 2 | 1 | 2 | 2 | 1 | 1 | 2 | 1 | 3 |
| 0 | 2 | 2 | 3 | 2 | 4 | 1 | 8 | 1 | 3 |
| 1 | 2 | 1 | 3 | 2 | 4 | 3 | 6 | 1 | 1 |
| 1 | 2 | 2 | 2 | 2 | 4 | 1 | 1 | 3 | 1 |
| 1 | 1 | 2 | 1 | 2 | 4 | 1 | 8 | 1 | 1 |
| 0 | 2 | 2 | 1 | 3 | 4 | 4 | 7 | 2 | 1 |
| 1 | 1 | 2 | 2 | 2 | 4 | 2 | 8 | 1 | 2 |
| 0 | 3 | 1 | 2 | 2 | 4 | 1 | 1 | 3 | 1 |
| 0 | 3 | 2 | 3 | 2 | 4 | 1 | 6 | 2 | 3 |
| 1 | 1 | 1 | 1 | 2 | 4 | 2 | 4 | 3 | 3 |
| 1 | 3 | 2 | 2 | 2 | 3 | 2 | 3 | 3 | 3 |
| 0 | 3 | 1 | 2 | 2 | 3 | 1 | 8 | 1 | 3 |
| 1 | 3 | 2 | 2 | 2 | 3 | 3 | 8 | 3 | 2 |
| 1 | 2 | 2 | 1 | 2 | 4 | 1 | 1 | 3 | 1 |
| 0 | 2 | 1 | 3 | 2 | 3 | 1 | 5 | 3 | 3 |
| 1 | 3 | 1 | 1 | 3 | 2 | 1 | 4 | 3 | 1 |
| 0 | 2 | 2 | 2 | 2 | 2 | 1 | 3 | 3 | 2 |
| 1 | 3 | 1 | 2 | 2 | 3 | 3 | 7 | 3 | 1 |
| 0 | 2 | 1 | 2 | 2 | 4 | 5 | 1 | 3 | 2 |
| 0 | 2 | 2 | 2 | 2 | 4 | 1 | 3 | 3 | 1 |
| 1 | 3 | 1 | 2 | 2 | 4 | 1 | 9 | 2 | 3 |
| 1 | 3 | 2 | 1 | 3 | 3 | 1 | 8 | 2 | 1 |
| 1 | 3 | 1 | 2 | 3 | 4 | 1 | 6 | 1 | 1 |
| 1 | 3 | 2 | 2 | 2 | 4 | 4 | 1 | 3 | 2 |
| 1 | 2 | 1 | 2 | 2 | 3 | 2 | 8 | 1 | 2 |
| 1 | 2 | 1 | 2 | 2 | 4 | 4 | 5 | 3 | 3 |
| 1 | 2 | 2 | 2 | 1 | 4 | 1 | 4 | 2 | 3 |
| 1 | 2 | 2 | 2 | 2 | 2 | 1 | 9 | 1 | 3 |
| 1 | 3 | 1 | 1 | 2 | 2 | 1 | 1 | 1 | 1 |
| 1 | 1 | 1 | 1 | 1 | 4 | 5 | 3 | 3 | 1 |
| 1 | 3 | 1 | 3 | 2 | 4 | 4 | 1 | 3 | 1 |
| 0 | 3 | 2 | 2 | 2 | 3 | 1 | 8 | 1 | 3 |
| 1 | 3 | 2 | 2 | 2 | 4 | 1 | 1 | 3 | 3 |
| 0 | 2 | 2 | 2 | 2 | 4 | 1 | 8 | 2 | 3 |
| 0 | 2 | 1 | 2 | 2 | 4 | 5 | 8 | 1 | 3 |
| 0 | 3 | 2 | 2 | 2 | 4 | 1 | 1 | 3 | 3 |
| 1 | 3 | 2 | 2 | 2 | 4 | 3 | 6 | 2 | 3 |
| 1 | 3 | 1 | 3 | 3 | 3 | 3 | 6 | 2 | 1 |
| 1 | 3 | 2 | 2 | 2 | 4 | 1 | 6 | 1 | 1 |
| 1 | 2 | 1 | 3 | 3 | 3 | 1 | 6 | 1 | 1 |
| 1 | 2 | 1 | 2 | 2 | 4 | 1 | 8 | 1 | 1 |
| 1 | 2 | 1 | 2 | 2 | 4 | 1 | 6 | 1 | 1 |



|   |   |   |   |   |   |   |   |   |   |
|---|---|---|---|---|---|---|---|---|---|
| 1 | 3 | 1 | 2 | 3 | 4 | 3 | 1 | 3 | 3 |
| 0 | 3 | 1 | 3 | 3 | 4 | 3 | 1 | 3 | 1 |
| 1 | 2 | 1 | 2 | 3 | 4 | 1 | 6 | 1 | 2 |
| 1 | 3 | 2 | 2 | 3 | 4 | 2 | 9 | 3 | 2 |
| 0 | 2 | 1 | 2 | 2 | 4 | 1 | 7 | 3 | 3 |
| 0 | 3 | 1 | 2 | 2 | 4 | 1 | 8 | 1 | 2 |
| 1 | 2 | 1 | 2 | 2 | 3 | 3 | 7 | 3 | 3 |
| 0 | 3 | 2 | 2 | 2 | 4 | 1 | 6 | 2 | 3 |
| 0 | 3 | 1 | 2 | 2 | 4 | 2 | 8 | 2 | 2 |
| 1 | 1 | 1 | 1 | 2 | 4 | 1 | 9 | 3 | 1 |
| 0 | 1 | 1 | 1 | 1 | 4 | 1 | 4 | 1 | 1 |
| 0 | 2 | 1 | 2 | 2 | 3 | 5 | 1 | 1 | 2 |
| 1 | 2 | 1 | 2 | 2 | 4 | 3 | 2 | 1 | 3 |
| 1 | 2 | 1 | 2 | 2 | 4 | 5 | 3 | 1 | 3 |
| 1 | 2 | 1 | 2 | 3 | 3 | 2 | 1 | 3 | 2 |
| 1 | 2 | 1 | 2 | 2 | 3 | 1 | 4 | 3 | 3 |
| 1 | 2 | 1 | 2 | 2 | 3 | 3 | 6 | 1 | 3 |
| 1 | 2 | 1 | 2 | 2 | 3 | 4 | 5 | 3 | 3 |
| 0 | 2 | 1 | 2 | 2 | 3 | 1 | 8 | 1 | 2 |
| 1 | 2 | 1 | 2 | 2 | 4 | 3 | 7 | 3 | 3 |
| 1 | 2 | 1 | 2 | 2 | 4 | 3 | 5 | 3 | 3 |
| 1 | 2 | 1 | 3 | 3 | 4 | 5 | 1 | 3 | 3 |
| 0 | 2 | 1 | 2 | 3 | 4 | 4 | 1 | 3 | 3 |
| 1 | 2 | 1 | 2 | 2 | 4 | 6 | 9 | 1 | 3 |
| 0 | 2 | 2 | 2 | 2 | 4 | 1 | 2 | 2 | 2 |
| 1 | 2 | 1 | 2 | 2 | 4 | 5 | 1 | 1 | 3 |
| 1 | 2 | 1 | 2 | 2 | 3 | 3 | 3 | 3 | 3 |
| 1 | 3 | 1 | 3 | 2 | 3 | 5 | 6 | 1 | 3 |
| 1 | 2 | 1 | 3 | 2 | 4 | 4 | 5 | 1 | 3 |
| 0 | 2 | 1 | 2 | 1 | 4 | 2 | 1 | 2 | 3 |
| 0 | 3 | 1 | 3 | 2 | 4 | 6 | 4 | 3 | 3 |
| 0 | 3 | 1 | 3 | 2 | 4 | 1 | 7 | 3 | 3 |
| 1 | 3 | 1 | 2 | 2 | 4 | 2 | 8 | 1 | 3 |
| 1 | 3 | 2 | 2 | 2 | 4 | 4 | 9 | 3 | 3 |
| 0 | 3 | 1 | 2 | 2 | 4 | 1 | 9 | 1 | 3 |
| 1 | 3 | 1 | 3 | 2 | 4 | 4 | 6 | 1 | 3 |
| 1 | 3 | 1 | 3 | 2 | 4 | 6 | 4 | 1 | 3 |
| 1 | 3 | 1 | 2 | 1 | 4 | 4 | 4 | 1 | 3 |
| 0 | 3 | 1 | 1 | 1 | 4 | 4 | 1 | 1 | 3 |
| 1 | 3 | 2 | 2 | 2 | 4 | 5 | 1 | 1 | 3 |
| 1 | 3 | 1 | 3 | 2 | 4 | 2 | 8 | 1 | 1 |
| 1 | 3 | 1 | 2 | 1 | 4 | 2 | 9 | 3 | 3 |
| 0 | 3 | 1 | 2 | 2 | 4 | 3 | 6 | 1 | 3 |
| 1 | 3 | 1 | 2 | 2 | 4 | 3 | 9 | 2 | 3 |
| 0 | 3 | 1 | 1 | 1 | 4 | 1 | 9 | 1 | 2 |
| 0 | 2 | 1 | 3 | 2 | 4 | 5 | 4 | 3 | 3 |
| 1 | 2 | 1 | 2 | 2 | 3 | 1 | 9 | 2 | 3 |

|   |   |   |   |   |   |   |   |   |   |
|---|---|---|---|---|---|---|---|---|---|
| 1 | 2 | 1 | 2 | 2 | 4 | 4 | 4 | 1 | 3 |
| 1 | 3 | 1 | 3 | 2 | 4 | 6 | 6 | 1 | 3 |
| 1 | 3 | 1 | 3 | 2 | 4 | 4 | 4 | 1 | 3 |
| 0 | 3 | 1 | 2 | 2 | 4 | 2 | 9 | 1 | 3 |
| 1 | 3 | 1 | 2 | 2 | 4 | 4 | 1 | 1 | 3 |
| 1 | 3 | 1 | 3 | 2 | 4 | 5 | 6 | 1 | 3 |
| 1 | 3 | 1 | 3 | 2 | 4 | 5 | 4 | 1 | 2 |
| 1 | 1 | 1 | 1 | 2 | 4 | 1 | 9 | 3 | 1 |
| 1 | 1 | 1 | 1 | 1 | 4 | 1 | 4 | 1 | 1 |
| 0 | 2 | 1 | 2 | 2 | 3 | 5 | 1 | 1 | 2 |
| 1 | 2 | 1 | 2 | 2 | 4 | 3 | 2 | 1 | 3 |
| 1 | 2 | 1 | 2 | 2 | 3 | 5 | 3 | 1 | 3 |
| 1 | 2 | 1 | 2 | 3 | 3 | 2 | 1 | 3 | 2 |
| 1 | 2 | 1 | 2 | 2 | 3 | 1 | 4 | 3 | 3 |
| 1 | 2 | 1 | 2 | 2 | 3 | 3 | 6 | 1 | 3 |
| 1 | 2 | 1 | 2 | 1 | 4 | 4 | 5 | 3 | 3 |
| 0 | 2 | 1 | 2 | 2 | 3 | 1 | 8 | 1 | 2 |
| 1 | 2 | 1 | 2 | 2 | 4 | 3 | 7 | 3 | 3 |
| 1 | 2 | 1 | 2 | 2 | 4 | 3 | 5 | 3 | 3 |
| 1 | 2 | 1 | 3 | 3 | 4 | 5 | 1 | 3 | 3 |
| 0 | 2 | 1 | 2 | 3 | 4 | 4 | 1 | 3 | 3 |
| 1 | 2 | 1 | 2 | 2 | 4 | 6 | 9 | 1 | 3 |
| 0 | 2 | 2 | 2 | 2 | 4 | 1 | 2 | 2 | 2 |
| 1 | 2 | 1 | 2 | 2 | 4 | 5 | 1 | 1 | 3 |
| 1 | 2 | 1 | 2 | 2 | 3 | 3 | 3 | 3 | 3 |
| 1 | 3 | 1 | 3 | 2 | 3 | 5 | 6 | 1 | 3 |
| 1 | 2 | 1 | 3 | 2 | 4 | 4 | 5 | 1 | 3 |
| 0 | 2 | 1 | 2 | 1 | 4 | 2 | 1 | 2 | 3 |
| 0 | 3 | 1 | 3 | 2 | 4 | 6 | 4 | 3 | 3 |
| 0 | 3 | 1 | 3 | 2 | 4 | 1 | 7 | 3 | 3 |
| 1 | 3 | 1 | 2 | 1 | 4 | 2 | 8 | 1 | 3 |
| 1 | 3 | 2 | 2 | 2 | 4 | 4 | 9 | 3 | 3 |
| 0 | 3 | 1 | 2 | 2 | 4 | 1 | 9 | 1 | 3 |
| 1 | 3 | 1 | 3 | 2 | 4 | 4 | 6 | 1 | 3 |
| 1 | 3 | 1 | 3 | 2 | 4 | 6 | 4 | 1 | 3 |
| 1 | 3 | 1 | 2 | 1 | 4 | 4 | 4 | 1 | 3 |
| 0 | 3 | 1 | 1 | 1 | 4 | 4 | 1 | 1 | 3 |
| 1 | 3 | 2 | 2 | 2 | 4 | 5 | 1 | 1 | 3 |
| 1 | 3 | 1 | 3 | 2 | 4 | 2 | 8 | 1 | 1 |
| 1 | 3 | 1 | 2 | 1 | 4 | 2 | 9 | 3 | 3 |
| 0 | 3 | 1 | 2 | 2 | 4 | 3 | 6 | 1 | 3 |
| 1 | 3 | 1 | 2 | 2 | 4 | 3 | 9 | 2 | 3 |
| 0 | 3 | 1 | 1 | 1 | 4 | 1 | 9 | 1 | 2 |
| 0 | 2 | 1 | 3 | 2 | 4 | 5 | 4 | 3 | 3 |
| 1 | 2 | 1 | 2 | 2 | 3 | 1 | 9 | 2 | 3 |
| 0 | 2 | 1 | 2 | 2 | 4 | 4 | 4 | 1 | 3 |
| 0 | 3 | 1 | 3 | 2 | 4 | 6 | 6 | 1 | 3 |

|   |   |   |   |   |   |   |   |   |   |
|---|---|---|---|---|---|---|---|---|---|
| 1 | 3 | 1 | 3 | 2 | 4 | 4 | 4 | 1 | 3 |
| 0 | 3 | 1 | 2 | 2 | 4 | 2 | 9 | 1 | 3 |
| 1 | 3 | 1 | 2 | 2 | 4 | 4 | 6 | 2 | 3 |
| 1 | 3 | 1 | 3 | 2 | 4 | 4 | 6 | 1 | 3 |
| 0 | 3 | 1 | 3 | 2 | 4 | 5 | 4 | 1 | 2 |
| 0 | 3 | 1 | 2 | 2 | 4 | 4 | 6 | 3 | 3 |
| 1 | 2 | 2 | 2 | 2 | 4 | 1 | 9 | 3 | 3 |
| 0 | 2 | 2 | 2 | 2 | 1 | 1 | 6 | 1 | 3 |
| 1 | 3 | 2 | 2 | 2 | 2 | 3 | 3 | 1 | 3 |
| 1 | 3 | 2 | 2 | 2 | 3 | 1 | 7 | 1 | 1 |
| 1 | 3 | 2 | 2 | 1 | 4 | 3 | 9 | 1 | 3 |
| 1 | 2 | 2 | 2 | 2 | 4 | 3 | 9 | 3 | 3 |
| 0 | 2 | 2 | 2 | 2 | 4 | 2 | 5 | 3 | 1 |
| 1 | 3 | 2 | 3 | 2 | 4 | 4 | 9 | 3 | 3 |
| 1 | 2 | 2 | 2 | 1 | 4 | 2 | 3 | 2 | 3 |
| 1 | 2 | 1 | 2 | 1 | 4 | 2 | 4 | 3 | 1 |
| 0 | 3 | 1 | 3 | 2 | 4 | 1 | 6 | 1 | 3 |
| 1 | 2 | 1 | 2 | 2 | 4 | 1 | 1 | 1 | 2 |
| 0 | 2 | 1 | 3 | 2 | 4 | 3 | 9 | 3 | 2 |
| 0 | 2 | 2 | 2 | 3 | 4 | 1 | 6 | 1 | 1 |
| 1 | 2 | 2 | 2 | 2 | 4 | 1 | 7 | 3 | 3 |
| 1 | 2 | 1 | 1 | 1 | 4 | 3 | 8 | 1 | 1 |
| 0 | 3 | 1 | 2 | 2 | 4 | 2 | 1 | 1 | 3 |
| 1 | 2 | 1 | 3 | 2 | 1 | 1 | 6 | 1 | 1 |
| 0 | 3 | 1 | 2 | 1 | 4 | 2 | 6 | 1 | 3 |
| 0 | 3 | 1 | 3 | 2 | 1 | 2 | 9 | 3 | 3 |
| 0 | 3 | 1 | 3 | 2 | 4 | 3 | 1 | 3 | 3 |
| 1 | 3 | 1 | 2 | 3 | 4 | 1 | 9 | 2 | 3 |
| 1 | 2 | 1 | 2 | 2 | 1 | 2 | 1 | 3 | 3 |
| 1 | 2 | 1 | 2 | 2 | 4 | 2 | 4 | 1 | 2 |
| 1 | 3 | 2 | 2 | 2 | 4 | 1 | 9 | 3 | 3 |
| 1 | 3 | 1 | 1 | 1 | 4 | 2 | 4 | 1 | 1 |
| 1 | 2 | 1 | 2 | 2 | 3 | 4 | 1 | 3 | 3 |
| 0 | 2 | 1 | 2 | 1 | 4 | 2 | 6 | 1 | 1 |
| 0 | 2 | 1 | 2 | 2 | 3 | 4 | 7 | 2 | 2 |
| 0 | 3 | 2 | 1 | 2 | 3 | 4 | 8 | 1 | 1 |
| 1 | 3 | 1 | 2 | 3 | 3 | 2 | 1 | 2 | 1 |
| 1 | 3 | 1 | 1 | 2 | 4 | 3 | 1 | 3 | 2 |
| 0 | 3 | 1 | 2 | 1 | 4 | 3 | 6 | 1 | 2 |
| 0 | 2 | 2 | 2 | 2 | 4 | 1 | 6 | 3 | 2 |
| 1 | 3 | 1 | 1 | 2 | 4 | 3 | 1 | 3 | 1 |
| 1 | 3 | 1 | 2 | 2 | 4 | 3 | 1 | 3 | 3 |
| 0 | 2 | 1 | 2 | 2 | 4 | 2 | 1 | 1 | 3 |
| 1 | 3 | 1 | 2 | 3 | 4 | 2 | 6 | 1 | 1 |
| 1 | 1 | 1 | 1 | 1 | 4 | 3 | 6 | 1 | 1 |
| 1 | 3 | 2 | 2 | 3 | 4 | 2 | 8 | 1 | 3 |
| 1 | 3 | 2 | 3 | 2 | 4 | 2 | 8 | 1 | 3 |

|   |   |   |   |   |   |   |   |   |   |
|---|---|---|---|---|---|---|---|---|---|
| 1 | 3 | 1 | 1 | 2 | 4 | 1 | 8 | 1 | 1 |
| 0 | 3 | 1 | 2 | 1 | 4 | 2 | 1 | 3 | 3 |
| 0 | 3 | 1 | 2 | 2 | 4 | 1 | 9 | 1 | 3 |
| 0 | 2 | 2 | 2 | 2 | 4 | 2 | 4 | 3 | 2 |
| 0 | 2 | 1 | 2 | 1 | 2 | 6 | 1 | 3 | 3 |
| 0 | 2 | 2 | 2 | 2 | 3 | 2 | 1 | 1 | 3 |
| 0 | 2 | 1 | 2 | 2 | 4 | 2 | 7 | 1 | 3 |
| 0 | 2 | 2 | 1 | 2 | 4 | 2 | 1 | 2 | 3 |
| 1 | 3 | 2 | 2 | 2 | 2 | 1 | 1 | 1 | 3 |
| 1 | 3 | 2 | 2 | 2 | 4 | 1 | 8 | 1 | 3 |
| 0 | 2 | 2 | 2 | 2 | 4 | 3 | 1 | 1 | 3 |
| 1 | 3 | 1 | 2 | 2 | 4 | 3 | 4 | 3 | 2 |
| 1 | 2 | 2 | 2 | 2 | 4 | 4 | 4 | 2 | 2 |
| 1 | 3 | 1 | 3 | 2 | 2 | 4 | 6 | 1 | 3 |
| 0 | 3 | 1 | 2 | 2 | 4 | 3 | 1 | 3 | 3 |
| 0 | 3 | 1 | 3 | 3 | 4 | 1 | 9 | 1 | 1 |
| 1 | 3 | 1 | 2 | 3 | 4 | 4 | 1 | 3 | 1 |
| 1 | 3 | 1 | 2 | 3 | 2 | 3 | 1 | 3 | 1 |
| 1 | 3 | 1 | 2 | 2 | 3 | 3 | 1 | 1 | 1 |
| 0 | 3 | 1 | 1 | 2 | 4 | 3 | 6 | 1 | 3 |
| 1 | 2 | 1 | 2 | 3 | 4 | 4 | 1 | 1 | 3 |
| 1 | 3 | 1 | 3 | 2 | 4 | 4 | 1 | 3 | 1 |
| 1 | 2 | 1 | 2 | 2 | 4 | 3 | 9 | 1 | 1 |
| 0 | 2 | 1 | 2 | 2 | 4 | 4 | 1 | 3 | 3 |
| 1 | 2 | 1 | 2 | 2 | 2 | 4 | 1 | 1 | 2 |
| 0 | 2 | 1 | 2 | 2 | 2 | 3 | 6 | 1 | 3 |
| 1 | 2 | 1 | 1 | 2 | 1 | 4 | 1 | 3 | 3 |
| 0 | 2 | 1 | 1 | 2 | 3 | 1 | 6 | 1 | 1 |
| 1 | 3 | 2 | 2 | 2 | 4 | 3 | 1 | 3 | 3 |
| 1 | 1 | 1 | 1 | 2 | 4 | 3 | 4 | 1 | 1 |
| 0 | 2 | 1 | 2 | 1 | 4 | 3 | 1 | 2 | 3 |
| 1 | 3 | 1 | 2 | 3 | 4 | 3 | 1 | 1 | 3 |
| 1 | 3 | 1 | 2 | 2 | 4 | 3 | 8 | 1 | 3 |
| 0 | 3 | 1 | 3 | 2 | 4 | 3 | 1 | 1 | 1 |
| 0 | 3 | 1 | 2 | 3 | 4 | 1 | 6 | 1 | 3 |
| 1 | 3 | 1 | 3 | 3 | 2 | 4 | 1 | 2 | 2 |
| 1 | 3 | 1 | 2 | 2 | 4 | 3 | 1 | 2 | 2 |
| 1 | 3 | 1 | 1 | 2 | 4 | 3 | 1 | 1 | 1 |
| 0 | 3 | 1 | 1 | 1 | 4 | 1 | 8 | 1 | 3 |
| 0 | 2 | 2 | 3 | 2 | 4 | 4 | 6 | 1 | 2 |
| 0 | 2 | 1 | 3 | 3 | 2 | 3 | 6 | 1 | 2 |
| 1 | 2 | 2 | 2 | 2 | 3 | 3 | 9 | 3 | 1 |
| 0 | 2 | 1 | 2 | 2 | 4 | 4 | 8 | 1 | 3 |
| 1 | 3 | 1 | 3 | 3 | 4 | 3 | 8 | 2 | 3 |
| 0 | 2 | 2 | 3 | 2 | 4 | 2 | 8 | 1 | 3 |
| 1 | 2 | 1 | 3 | 2 | 4 | 4 | 6 | 1 | 1 |
| 0 | 2 | 2 | 1 | 3 | 4 | 4 | 7 | 2 | 1 |

|   |   |   |   |   |   |   |   |   |   |
|---|---|---|---|---|---|---|---|---|---|
| 1 | 1 | 2 | 2 | 2 | 4 | 2 | 8 | 1 | 2 |
| 1 | 3 | 2 | 2 | 2 | 3 | 2 | 3 | 3 | 3 |
| 0 | 3 | 1 | 2 | 2 | 3 | 1 | 8 | 1 | 3 |
| 0 | 2 | 1 | 2 | 2 | 4 | 5 | 1 | 3 | 2 |
| 1 | 3 | 2 | 2 | 2 | 4 | 4 | 1 | 3 | 2 |
| 1 | 2 | 1 | 2 | 2 | 4 | 4 | 5 | 3 | 3 |
| 1 | 2 | 2 | 2 | 1 | 4 | 1 | 4 | 2 | 3 |
| 1 | 1 | 1 | 1 | 1 | 4 | 5 | 3 | 3 | 1 |
| 1 | 3 | 1 | 3 | 2 | 4 | 4 | 1 | 3 | 1 |
| 0 | 3 | 2 | 2 | 2 | 3 | 1 | 8 | 1 | 3 |
| 1 | 2 | 2 | 2 | 2 | 4 | 1 | 8 | 2 | 3 |
| 0 | 2 | 1 | 2 | 2 | 4 | 5 | 8 | 1 | 3 |
| 1 | 3 | 1 | 3 | 3 | 3 | 3 | 6 | 2 | 1 |
| 1 | 3 | 2 | 2 | 2 | 4 | 4 | 6 | 1 | 1 |
| 1 | 3 | 1 | 2 | 3 | 4 | 3 | 1 | 1 | 3 |
| 1 | 2 | 1 | 2 | 2 | 4 | 4 | 7 | 3 | 3 |

| LSMVcat1 | _st | _d | _t | _t0 | RRcat | DBpcat | CMVcat |
|----------|-----|----|----|-----|-------|--------|--------|
| 2        | 1   | 1  | 14 | 0   | 3     | 2      | 2      |
| 2        | 1   | 1  | 14 | 0   | 3     | 2      | 2      |
| 2        | 1   | 1  | 10 | 0   | 3     | 2      | 1      |
| 3        | 1   | 1  | 39 | 0   | 3     | 2      | 3      |
| 1        | 1   | 1  | 4  | 0   | 3     | 2      | 1      |
| 3        | 1   | 1  | 13 | 0   | 2     | 2      | 2      |
| 3        | 1   | 1  | 10 | 0   | 3     | 2      | 6      |
| 1        | 1   | 1  | 3  | 0   | 2     | 1      | 6      |
| 3        | 1   | 1  | 32 | 0   | 3     | 1      | 3      |
| 3        | 1   | 1  | 36 | 0   | 3     | 2      | 4      |
| 1        | 1   | 1  | 3  | 0   | 2     | 2      | 1      |
| 3        | 1   | 1  | 14 | 0   | 3     | 2      | 3      |
| 2        | 1   | 1  | 7  | 0   | 2     | 2      | 5      |
| 3        | 1   | 1  | 13 | 0   | 2     | 2      | 1      |
| 1        | 1   | 1  | 9  | 0   | 3     | 2      | 1      |
| 1        | 1   | 1  | 9  | 0   | 3     | 3      | 6      |
| 1        | 1   | 1  | 6  | 0   | 3     | 2      | 1      |
| 1        | 1   | 1  | 4  | 0   | 3     | 2      | 2      |
| 2        | 1   | 1  | 9  | 0   | 3     | 2      | 1      |
| 2        | 1   | 1  | 5  | 0   | 3     | 2      | 2      |
| 1        | 1   | 1  | 5  | 0   | 3     | 2      | 1      |
| 3        | 1   | 1  | 46 | 0   | 2     | 2      | 1      |
| 1        | 1   | 1  | 3  | 0   | 2     | 1      | 1      |
| 3        | 1   | 1  | 35 | 0   | 3     | 1      | 1      |
| 1        | 1   | 1  | 3  | 0   | 3     | 3      | 5      |
| 3        | 1   | 1  | 22 | 0   | 1     | 2      | 2      |
| 3        | 1   | 1  | 29 | 0   | 3     | 2      | 1      |
| 3        | 1   | 1  | 16 | 0   | 3     | 2      | 1      |
| 3        | 1   | 1  | 13 | 0   | 3     | 2      | 5      |
| 3        | 1   | 1  | 57 | 0   | 3     | 2      | 1      |
| 3        | 1   | 1  | 27 | 0   | 3     | 2      | 2      |
| 2        | 1   | 1  | 4  | 0   | 3     | 2      | 2      |
| 3        | 1   | 1  | 29 | 0   | 2     | 2      | 5      |
| 1        | 1   | 1  | 1  | 0   | 1     | 1      | 2      |
| 1        | 1   | 1  | 4  | 0   | 2     | 1      | 3      |
| 3        | 1   | 1  | 26 | 0   | 3     | 2      | 1      |
| 1        | 1   | 1  | 1  | 0   | 1     | 2      | 2      |
| 2        | 1   | 1  | 20 | 0   | 3     | 2      | 1      |
| 1        | 1   | 1  | 1  | 0   | 3     | 2      | 1      |
| 1        | 1   | 1  | 1  | 0   | 3     | 1      | 1      |
| 1        | 1   | 1  | 1  | 0   | 3     | 1      | 1      |
| 1        | 1   | 1  | 4  | 0   | 3     | 3      | 1      |
| 2        | 1   | 1  | 6  | 0   | 3     | 2      | 1      |
| 2        | 1   | 1  | 15 | 0   | 3     | 2      | 3      |
| 1        | 1   | 1  | 3  | 0   | 3     | 2      | 1      |
| 1        | 1   | 1  | 1  | 0   | 3     | 1      | 1      |

|   |   |   |    |   |   |   |   |
|---|---|---|----|---|---|---|---|
| 3 | 1 | 1 | 16 | 0 | 3 | 1 | 1 |
| 3 | 1 | 1 | 18 | 0 | 3 | 2 | 1 |
| 1 | 1 | 1 | 1  | 0 | 3 | 2 | 1 |
| 1 | 1 | 1 | 3  | 0 | 3 | 2 | 1 |
| 3 | 1 | 1 | 30 | 0 | 3 | 2 | 3 |
| 3 | 1 | 1 | 70 | 0 | 3 | 3 | 6 |
| 1 | 1 | 1 | 3  | 0 | 3 | 1 | 2 |
| 2 | 1 | 1 | 4  | 0 | 3 | 1 | 1 |
| 2 | 1 | 1 | 11 | 0 | 3 | 3 | 1 |
| 2 | 1 | 1 | 10 | 0 | 3 | 2 | 1 |
| 2 | 1 | 1 | 6  | 0 | 2 | 2 | 2 |
| 3 | 1 | 1 | 12 | 0 | 3 | 2 | 1 |
| 2 | 1 | 1 | 12 | 0 | 2 | 1 | 1 |
| 1 | 1 | 1 | 7  | 0 | 3 | 2 | 6 |
| 3 | 1 | 1 | 12 | 0 | 3 | 2 | 1 |
| 2 | 1 | 1 | 8  | 0 | 3 | 2 | 3 |
| 2 | 1 | 1 | 9  | 0 | 2 | 2 | 2 |
| 1 | 1 | 1 | 2  | 0 | 3 | 2 | 2 |
| 3 | 1 | 1 | 24 | 0 | 2 | 2 | 1 |
| 3 | 1 | 1 | 20 | 0 | 3 | 1 | 2 |
| 1 | 1 | 1 | 10 | 0 | 3 | 2 | 3 |
| 1 | 1 | 1 | 6  | 0 | 3 | 1 | 2 |
| 3 | 1 | 1 | 18 | 0 | 3 | 3 | 3 |
| 3 | 1 | 1 | 13 | 0 | 3 | 1 | 4 |
| 2 | 1 | 1 | 27 | 0 | 3 | 2 | 3 |
| 2 | 1 | 1 | 28 | 0 | 3 | 2 | 1 |
| 2 | 1 | 1 | 4  | 0 | 3 | 2 | 1 |
| 1 | 1 | 1 | 3  | 0 | 3 | 2 | 3 |
| 3 | 1 | 1 | 34 | 0 | 3 | 3 | 1 |
| 2 | 1 | 1 | 6  | 0 | 3 | 2 | 1 |
| 3 | 1 | 1 | 15 | 0 | 3 | 3 | 1 |
| 1 | 1 | 1 | 2  | 0 | 3 | 2 | 2 |
| 2 | 1 | 1 | 11 | 0 | 3 | 2 | 1 |
| 1 | 1 | 1 | 2  | 0 | 3 | 2 | 1 |
| 1 | 1 | 1 | 5  | 0 | 2 | 2 | 1 |
| 1 | 1 | 1 | 3  | 0 | 3 | 1 | 1 |
| 3 | 1 | 1 | 28 | 0 | 3 | 1 | 2 |
| 3 | 1 | 1 | 37 | 0 | 2 | 1 | 2 |
| 1 | 1 | 1 | 1  | 0 | 2 | 2 | 1 |
| 1 | 1 | 1 | 1  | 0 | 3 | 3 | 1 |
| 1 | 1 | 1 | 1  | 0 | 3 | 1 | 1 |
| 3 | 1 | 1 | 29 | 0 | 2 | 2 | 1 |
| 2 | 1 | 1 | 9  | 0 | 3 | 1 | 1 |
| 1 | 1 | 1 | 4  | 0 | 3 | 3 | 1 |
| 1 | 1 | 1 | 9  | 0 | 3 | 2 | 2 |
| 2 | 1 | 1 | 5  | 0 | 3 | 2 | 1 |
| 1 | 1 | 1 | 3  | 0 | 2 | 1 | 1 |

|   |   |   |    |   |   |   |   |
|---|---|---|----|---|---|---|---|
| 1 | 1 | 1 | 15 | 0 | 3 | 2 | 1 |
| 1 | 1 | 1 | 11 | 0 | 2 | 2 | 1 |
| 2 | 1 | 1 | 16 | 0 | 3 | 1 | 1 |
| 1 | 1 | 1 | 3  | 0 | 2 | 2 | 2 |
| 3 | 1 | 1 | 13 | 0 | 3 | 2 | 1 |
| 2 | 1 | 1 | 6  | 0 | 3 | 3 | 1 |
| 1 | 1 | 1 | 2  | 0 | 3 | 2 | 1 |
| 3 | 1 | 1 | 10 | 0 | 3 | 2 | 1 |
| 3 | 1 | 1 | 18 | 0 | 3 | 2 | 1 |
| 1 | 1 | 1 | 1  | 0 | 3 | 2 | 1 |
| 1 | 1 | 1 | 3  | 0 | 3 | 2 | 1 |
| 1 | 1 | 1 | 3  | 0 | 3 | 2 | 1 |
| 3 | 1 | 1 | 15 | 0 | 3 | 2 | 1 |
| 1 | 1 | 1 | 1  | 0 | 3 | 3 | 1 |
| 3 | 1 | 1 | 10 | 0 | 3 | 1 | 2 |
| 3 | 1 | 1 | 10 | 0 | 3 | 2 | 3 |
| 2 | 1 | 1 | 6  | 0 | 3 | 2 | 1 |
| 1 | 1 | 1 | 7  | 0 | 3 | 1 | 1 |
| 2 | 1 | 1 | 5  | 0 | 3 | 2 | 2 |
| 2 | 1 | 1 | 4  | 0 | 3 | 2 | 1 |
| 2 | 1 | 1 | 7  | 0 | 3 | 2 | 1 |
| 1 | 1 | 1 | 6  | 0 | 3 | 2 | 2 |
| 2 | 1 | 1 | 9  | 0 | 3 | 1 | 1 |
| 3 | 1 | 1 | 18 | 0 | 2 | 2 | 3 |
| 1 | 1 | 1 | 3  | 0 | 3 | 2 | 1 |
| 3 | 1 | 1 | 15 | 0 | 3 | 2 | 1 |
| 2 | 1 | 1 | 6  | 0 | 3 | 1 | 5 |
| 3 | 1 | 1 | 31 | 0 | 3 | 1 | 1 |
| 1 | 1 | 1 | 3  | 0 | 3 | 2 | 1 |
| 2 | 1 | 1 | 4  | 0 | 2 | 2 | 1 |
| 3 | 1 | 1 | 15 | 0 | 1 | 2 | 1 |
| 1 | 1 | 1 | 3  | 0 | 3 | 2 | 1 |
| 1 | 1 | 1 | 5  | 0 | 2 | 2 | 5 |
| 3 | 1 | 1 | 21 | 0 | 3 | 2 | 1 |
| 1 | 1 | 1 | 26 | 0 | 3 | 2 | 1 |
| 3 | 1 | 1 | 27 | 0 | 2 | 2 | 1 |
| 2 | 1 | 1 | 5  | 0 | 3 | 3 | 2 |
| 2 | 1 | 1 | 8  | 0 | 2 | 2 | 1 |
| 2 | 1 | 1 | 5  | 0 | 3 | 3 | 2 |
| 3 | 1 | 1 | 10 | 0 | 3 | 3 | 1 |
| 1 | 1 | 1 | 4  | 0 | 2 | 2 | 5 |
| 1 | 1 | 1 | 9  | 0 | 2 | 2 | 1 |
| 1 | 1 | 1 | 2  | 0 | 3 | 1 | 1 |
| 3 | 1 | 1 | 14 | 0 | 2 | 2 | 1 |
| 3 | 1 | 1 | 8  | 0 | 3 | 3 | 4 |
| 1 | 1 | 1 | 1  | 0 | 3 | 2 | 1 |
| 1 | 1 | 1 | 15 | 0 | 2 | 2 | 4 |



|   |   |   |    |   |   |   |   |
|---|---|---|----|---|---|---|---|
| 3 | 1 | 1 | 13 | 0 | 1 | 1 | 1 |
| 3 | 1 | 1 | 49 | 0 | 3 | 2 | 1 |
| 1 | 1 | 1 | 3  | 0 | 3 | 2 | 1 |
| 2 | 1 | 1 | 6  | 0 | 2 | 1 | 1 |
| 1 | 1 | 1 | 2  | 0 | 3 | 2 | 1 |
| 3 | 1 | 1 | 13 | 0 | 2 | 2 | 5 |
| 3 | 1 | 1 | 28 | 0 | 2 | 3 | 1 |
| 1 | 1 | 1 | 3  | 0 | 3 | 3 | 1 |
| 1 | 1 | 1 | 1  | 0 | 2 | 2 | 1 |
| 1 | 1 | 1 | 2  | 0 | 3 | 1 | 1 |
| 1 | 1 | 1 | 14 | 0 | 3 | 2 | 1 |
| 2 | 1 | 1 | 5  | 0 | 3 | 2 | 2 |
| 1 | 1 | 1 | 2  | 0 | 3 | 2 | 1 |
| 3 | 1 | 1 | 42 | 0 | 3 | 2 | 1 |
| 3 | 1 | 1 | 12 | 0 | 3 | 2 | 1 |
| 3 | 1 | 1 | 29 | 0 | 3 | 2 | 3 |
| 3 | 1 | 1 | 10 | 0 | 3 | 2 | 1 |
| 2 | 1 | 1 | 6  | 0 | 3 | 2 | 1 |
| 1 | 1 | 1 | 3  | 0 | 2 | 1 | 1 |
| 3 | 1 | 1 | 14 | 0 | 3 | 3 | 4 |
| 1 | 1 | 1 | 1  | 0 | 3 | 1 | 1 |
| 2 | 1 | 1 | 11 | 0 | 3 | 2 | 2 |
| 1 | 1 | 1 | 1  | 0 | 3 | 2 | 1 |
| 1 | 1 | 1 | 4  | 0 | 3 | 2 | 1 |
| 1 | 1 | 1 | 3  | 0 | 3 | 2 | 1 |
| 3 | 1 | 1 | 20 | 0 | 3 | 2 | 1 |
| 1 | 1 | 1 | 1  | 0 | 3 | 1 | 1 |
| 1 | 1 | 1 | 12 | 0 | 3 | 1 | 2 |
| 2 | 1 | 1 | 5  | 0 | 3 | 2 | 4 |
| 2 | 1 | 1 | 11 | 0 | 3 | 2 | 1 |
| 1 | 1 | 1 | 8  | 0 | 3 | 1 | 1 |
| 3 | 1 | 1 | 24 | 0 | 2 | 2 | 1 |
| 3 | 1 | 1 | 9  | 0 | 3 | 2 | 1 |
| 1 | 1 | 1 | 1  | 0 | 3 | 1 | 1 |
| 1 | 1 | 1 | 2  | 0 | 3 | 2 | 1 |
| 1 | 1 | 1 | 3  | 0 | 3 | 3 | 1 |
| 3 | 1 | 1 | 41 | 0 | 3 | 2 | 1 |
| 3 | 1 | 1 | 26 | 0 | 3 | 2 | 1 |
| 3 | 1 | 1 | 27 | 0 | 3 | 2 | 1 |
| 3 | 1 | 1 | 28 | 0 | 3 | 2 | 1 |
| 3 | 1 | 1 | 20 | 0 | 3 | 2 | 1 |
| 3 | 1 | 1 | 17 | 0 | 2 | 2 | 1 |
| 1 | 1 | 1 | 1  | 0 | 2 | 3 | 1 |
| 1 | 1 | 1 | 1  | 0 | 2 | 2 | 5 |
| 1 | 1 | 1 | 2  | 0 | 3 | 2 | 2 |
| 1 | 1 | 1 | 1  | 0 | 3 | 2 | 1 |
| 1 | 1 | 1 | 1  | 0 | 3 | 2 | 2 |

|   |   |   |    |   |   |   |   |
|---|---|---|----|---|---|---|---|
| 3 | 1 | 1 | 19 | 0 | 3 | 2 | 1 |
| 1 | 1 | 1 | 2  | 0 | 3 | 3 | 1 |
| 2 | 1 | 1 | 6  | 0 | 1 | 2 | 2 |
| 2 | 1 | 1 | 8  | 0 | 3 | 2 | 1 |
| 3 | 1 | 1 | 29 | 0 | 2 | 2 | 1 |
| 2 | 1 | 1 | 16 | 0 | 2 | 2 | 1 |
| 3 | 1 | 1 | 11 | 0 | 3 | 2 | 1 |
| 3 | 1 | 1 | 27 | 0 | 3 | 2 | 2 |
| 1 | 1 | 1 | 5  | 0 | 3 | 2 | 1 |
| 1 | 1 | 1 | 1  | 0 | 3 | 2 | 1 |
| 1 | 1 | 1 | 1  | 0 | 3 | 2 | 2 |
| 2 | 1 | 1 | 5  | 0 | 3 | 1 | 1 |
| 3 | 1 | 1 | 24 | 0 | 2 | 2 | 2 |
| 3 | 1 | 1 | 27 | 0 | 2 | 2 | 1 |
| 2 | 1 | 1 | 7  | 0 | 3 | 2 | 1 |
| 3 | 1 | 1 | 12 | 0 | 3 | 2 | 4 |
| 3 | 1 | 1 | 29 | 0 | 2 | 2 | 2 |
| 3 | 1 | 1 | 18 | 0 | 2 | 2 | 1 |
| 2 | 1 | 1 | 7  | 0 | 3 | 2 | 1 |
| 3 | 1 | 1 | 25 | 0 | 2 | 2 | 1 |
| 3 | 1 | 1 | 30 | 0 | 3 | 2 | 4 |
| 3 | 1 | 1 | 25 | 0 | 3 | 3 | 1 |
| 3 | 1 | 1 | 17 | 0 | 3 | 2 | 1 |
| 3 | 1 | 1 | 9  | 0 | 3 | 2 | 1 |
| 2 | 1 | 1 | 5  | 0 | 2 | 2 | 5 |
| 3 | 1 | 1 | 33 | 0 | 2 | 2 | 3 |
| 3 | 1 | 1 | 31 | 0 | 2 | 2 | 3 |
| 3 | 1 | 1 | 26 | 0 | 1 | 3 | 2 |
| 3 | 1 | 1 | 28 | 0 | 2 | 2 | 1 |
| 3 | 1 | 1 | 24 | 0 | 2 | 2 | 1 |
| 3 | 1 | 1 | 35 | 0 | 2 | 3 | 2 |
| 3 | 1 | 1 | 41 | 0 | 2 | 2 | 1 |
| 3 | 1 | 1 | 31 | 0 | 3 | 2 | 1 |
| 3 | 1 | 1 | 32 | 0 | 2 | 2 | 3 |
| 3 | 1 | 1 | 15 | 0 | 3 | 2 | 2 |
| 3 | 1 | 1 | 23 | 0 | 1 | 2 | 2 |
| 3 | 1 | 1 | 18 | 0 | 2 | 3 | 2 |
| 3 | 1 | 1 | 9  | 0 | 2 | 2 | 1 |
| 3 | 1 | 1 | 25 | 0 | 2 | 1 | 1 |
| 3 | 1 | 1 | 43 | 0 | 2 | 2 | 2 |
| 1 | 1 | 1 | 3  | 0 | 3 | 3 | 1 |
| 3 | 1 | 1 | 30 | 0 | 3 | 2 | 3 |
| 3 | 1 | 1 | 29 | 0 | 2 | 2 | 2 |
| 3 | 1 | 1 | 26 | 0 | 2 | 2 | 3 |
| 1 | 1 | 1 | 5  | 0 | 2 | 1 | 1 |
| 2 | 1 | 1 | 8  | 0 | 2 | 3 | 1 |
| 3 | 1 | 1 | 24 | 0 | 2 | 2 | 2 |

|   |   |   |    |   |   |   |   |
|---|---|---|----|---|---|---|---|
| 3 | 1 | 1 | 22 | 0 | 3 | 2 | 1 |
| 3 | 1 | 1 | 25 | 0 | 1 | 3 | 2 |
| 3 | 1 | 1 | 27 | 0 | 2 | 3 | 2 |
| 3 | 1 | 1 | 36 | 0 | 2 | 3 | 3 |
| 3 | 1 | 1 | 25 | 0 | 2 | 2 | 1 |
| 3 | 1 | 1 | 28 | 0 | 2 | 3 | 2 |
| 2 | 1 | 1 | 4  | 0 | 2 | 3 | 2 |
| 1 | 1 | 1 | 1  | 0 | 3 | 2 | 1 |
| 1 | 1 | 1 | 1  | 0 | 3 | 2 | 2 |
| 2 | 1 | 1 | 5  | 0 | 3 | 1 | 1 |
| 3 | 1 | 1 | 24 | 0 | 2 | 2 | 2 |
| 3 | 1 | 1 | 27 | 0 | 2 | 2 | 1 |
| 2 | 1 | 1 | 7  | 0 | 3 | 2 | 1 |
| 3 | 1 | 1 | 12 | 0 | 3 | 2 | 4 |
| 3 | 1 | 1 | 29 | 0 | 2 | 2 | 2 |
| 3 | 1 | 1 | 18 | 0 | 2 | 2 | 1 |
| 2 | 1 | 1 | 7  | 0 | 3 | 2 | 1 |
| 3 | 1 | 1 | 25 | 0 | 2 | 2 | 1 |
| 3 | 1 | 1 | 30 | 0 | 3 | 2 | 4 |
| 3 | 1 | 1 | 25 | 0 | 3 | 3 | 1 |
| 3 | 1 | 1 | 17 | 0 | 3 | 2 | 1 |
| 3 | 1 | 1 | 9  | 0 | 3 | 2 | 1 |
| 2 | 1 | 1 | 5  | 0 | 2 | 2 | 5 |
| 3 | 1 | 1 | 33 | 0 | 2 | 2 | 3 |
| 3 | 1 | 1 | 31 | 0 | 2 | 2 | 3 |
| 3 | 1 | 1 | 26 | 0 | 1 | 3 | 2 |
| 3 | 1 | 1 | 28 | 0 | 2 | 2 | 1 |
| 3 | 1 | 1 | 24 | 0 | 2 | 2 | 1 |
| 3 | 1 | 1 | 35 | 0 | 2 | 3 | 2 |
| 3 | 1 | 1 | 41 | 0 | 2 | 2 | 1 |
| 3 | 1 | 1 | 31 | 0 | 3 | 2 | 1 |
| 3 | 1 | 1 | 32 | 0 | 2 | 2 | 3 |
| 3 | 1 | 1 | 15 | 0 | 3 | 2 | 2 |
| 3 | 1 | 1 | 23 | 0 | 1 | 2 | 2 |
| 3 | 1 | 1 | 18 | 0 | 2 | 3 | 2 |
| 3 | 1 | 1 | 9  | 0 | 2 | 2 | 1 |
| 3 | 1 | 1 | 25 | 0 | 2 | 1 | 1 |
| 3 | 1 | 1 | 43 | 0 | 2 | 2 | 2 |
| 1 | 1 | 1 | 3  | 0 | 3 | 3 | 1 |
| 3 | 1 | 1 | 30 | 0 | 3 | 2 | 3 |
| 3 | 1 | 1 | 29 | 0 | 2 | 2 | 2 |
| 3 | 1 | 1 | 26 | 0 | 2 | 2 | 3 |
| 1 | 1 | 1 | 5  | 0 | 2 | 1 | 1 |
| 2 | 1 | 1 | 8  | 0 | 2 | 3 | 1 |
| 3 | 1 | 1 | 24 | 0 | 2 | 2 | 2 |
| 3 | 1 | 1 | 22 | 0 | 3 | 2 | 1 |
| 3 | 1 | 1 | 25 | 0 | 1 | 3 | 2 |

|   |   |   |    |   |   |   |   |
|---|---|---|----|---|---|---|---|
| 3 | 1 | 1 | 27 | 0 | 2 | 3 | 2 |
| 3 | 1 | 1 | 36 | 0 | 2 | 3 | 3 |
| 3 | 1 | 1 | 25 | 0 | 2 | 2 | 1 |
| 3 | 1 | 1 | 28 | 0 | 2 | 3 | 2 |
| 2 | 1 | 1 | 4  | 0 | 2 | 3 | 2 |
| 2 | 1 | 1 | 14 | 0 | 3 | 2 | 2 |
| 3 | 1 | 1 | 39 | 0 | 3 | 2 | 3 |
| 3 | 1 | 1 | 13 | 0 | 2 | 2 | 2 |
| 3 | 1 | 1 | 10 | 0 | 3 | 2 | 6 |
| 1 | 1 | 1 | 3  | 0 | 2 | 1 | 6 |
| 3 | 1 | 1 | 32 | 0 | 3 | 1 | 3 |
| 3 | 1 | 1 | 36 | 0 | 3 | 2 | 4 |
| 1 | 1 | 1 | 3  | 0 | 2 | 2 | 1 |
| 3 | 1 | 1 | 14 | 0 | 3 | 2 | 3 |
| 3 | 1 | 1 | 13 | 0 | 2 | 2 | 1 |
| 1 | 1 | 1 | 4  | 0 | 3 | 2 | 1 |
| 1 | 1 | 1 | 9  | 0 | 3 | 3 | 1 |
| 1 | 1 | 1 | 4  | 0 | 3 | 2 | 2 |
| 2 | 1 | 1 | 9  | 0 | 3 | 2 | 1 |
| 1 | 1 | 1 | 5  | 0 | 3 | 2 | 1 |
| 3 | 1 | 1 | 59 | 0 | 2 | 2 | 1 |
| 1 | 1 | 1 | 3  | 0 | 2 | 1 | 1 |
| 3 | 1 | 1 | 35 | 0 | 3 | 1 | 1 |
| 1 | 1 | 1 | 3  | 0 | 3 | 3 | 5 |
| 3 | 1 | 1 | 22 | 0 | 1 | 2 | 2 |
| 3 | 1 | 1 | 29 | 0 | 3 | 2 | 1 |
| 3 | 1 | 1 | 16 | 0 | 3 | 2 | 1 |
| 3 | 1 | 1 | 13 | 0 | 3 | 2 | 5 |
| 3 | 1 | 1 | 27 | 0 | 3 | 2 | 2 |
| 2 | 1 | 1 | 4  | 0 | 3 | 2 | 2 |
| 3 | 1 | 1 | 29 | 0 | 2 | 2 | 5 |
| 1 | 1 | 1 | 1  | 0 | 1 | 1 | 2 |
| 3 | 1 | 1 | 26 | 0 | 3 | 2 | 1 |
| 1 | 1 | 1 | 1  | 0 | 1 | 2 | 2 |
| 2 | 1 | 1 | 20 | 0 | 3 | 2 | 1 |
| 1 | 1 | 1 | 1  | 0 | 3 | 2 | 1 |
| 1 | 1 | 1 | 1  | 0 | 3 | 1 | 1 |
| 1 | 1 | 1 | 4  | 0 | 3 | 1 | 1 |
| 2 | 1 | 1 | 6  | 0 | 3 | 2 | 1 |
| 2 | 1 | 1 | 15 | 0 | 3 | 2 | 3 |
| 1 | 1 | 1 | 1  | 0 | 3 | 1 | 1 |
| 3 | 1 | 1 | 16 | 0 | 3 | 1 | 1 |
| 3 | 1 | 1 | 18 | 0 | 3 | 2 | 1 |
| 1 | 1 | 1 | 1  | 0 | 3 | 2 | 1 |
| 1 | 1 | 1 | 3  | 0 | 3 | 2 | 1 |
| 3 | 1 | 1 | 30 | 0 | 3 | 2 | 3 |
| 3 | 1 | 1 | 70 | 0 | 3 | 3 | 6 |

|   |   |   |    |   |   |   |   |
|---|---|---|----|---|---|---|---|
| 1 | 1 | 1 | 3  | 0 | 3 | 1 | 2 |
| 2 | 1 | 1 | 11 | 0 | 3 | 3 | 1 |
| 2 | 1 | 1 | 10 | 0 | 3 | 2 | 1 |
| 2 | 1 | 1 | 6  | 0 | 2 | 2 | 2 |
| 3 | 1 | 1 | 12 | 0 | 3 | 2 | 1 |
| 2 | 1 | 1 | 9  | 0 | 2 | 2 | 2 |
| 3 | 1 | 1 | 24 | 0 | 2 | 2 | 1 |
| 3 | 1 | 1 | 20 | 0 | 3 | 1 | 2 |
| 3 | 1 | 1 | 10 | 0 | 3 | 2 | 3 |
| 3 | 1 | 1 | 18 | 0 | 3 | 3 | 3 |
| 2 | 1 | 1 | 27 | 0 | 3 | 2 | 3 |
| 2 | 1 | 1 | 28 | 0 | 3 | 2 | 1 |
| 2 | 1 | 1 | 4  | 0 | 3 | 2 | 1 |
| 3 | 1 | 1 | 34 | 0 | 3 | 3 | 1 |
| 3 | 1 | 1 | 15 | 0 | 3 | 3 | 1 |
| 1 | 1 | 1 | 2  | 0 | 3 | 2 | 2 |
| 1 | 1 | 1 | 2  | 0 | 3 | 2 | 1 |
| 1 | 1 | 1 | 5  | 0 | 2 | 2 | 1 |
| 1 | 1 | 1 | 3  | 0 | 3 | 1 | 1 |
| 3 | 1 | 1 | 28 | 0 | 3 | 1 | 2 |
| 3 | 1 | 1 | 37 | 0 | 2 | 1 | 2 |
| 1 | 1 | 1 | 1  | 0 | 3 | 3 | 1 |
| 1 | 1 | 1 | 1  | 0 | 3 | 1 | 1 |
| 3 | 1 | 1 | 29 | 0 | 2 | 2 | 1 |
| 2 | 1 | 1 | 9  | 0 | 3 | 1 | 1 |
| 1 | 1 | 1 | 9  | 0 | 3 | 2 | 2 |
| 3 | 1 | 1 | 19 | 0 | 3 | 1 | 1 |
| 1 | 1 | 1 | 3  | 0 | 2 | 2 | 2 |
| 3 | 1 | 1 | 13 | 0 | 3 | 2 | 1 |
| 1 | 1 | 1 | 2  | 0 | 3 | 2 | 1 |
| 3 | 1 | 1 | 10 | 0 | 3 | 2 | 1 |
| 3 | 1 | 1 | 18 | 0 | 3 | 2 | 1 |
| 3 | 1 | 1 | 15 | 0 | 3 | 2 | 1 |
| 1 | 1 | 1 | 1  | 0 | 3 | 3 | 1 |
| 3 | 1 | 1 | 10 | 0 | 3 | 1 | 2 |
| 2 | 1 | 1 | 4  | 0 | 3 | 2 | 1 |
| 2 | 1 | 1 | 7  | 0 | 3 | 2 | 1 |
| 1 | 1 | 1 | 3  | 0 | 3 | 2 | 1 |
| 3 | 1 | 1 | 6  | 0 | 3 | 1 | 1 |
| 2 | 1 | 1 | 10 | 0 | 3 | 3 | 2 |
| 2 | 1 | 1 | 10 | 0 | 3 | 3 | 2 |
| 1 | 1 | 1 | 5  | 0 | 2 | 2 | 5 |
| 3 | 1 | 1 | 14 | 0 | 2 | 2 | 1 |
| 3 | 1 | 1 | 49 | 0 | 3 | 2 | 1 |
| 3 | 1 | 1 | 28 | 0 | 2 | 3 | 1 |
| 1 | 1 | 1 | 3  | 0 | 3 | 3 | 1 |
| 1 | 1 | 1 | 14 | 0 | 3 | 2 | 1 |

|   |   |   |    |   |   |   |   |
|---|---|---|----|---|---|---|---|
| 2 | 1 | 1 | 5  | 0 | 3 | 2 | 2 |
| 3 | 1 | 1 | 29 | 0 | 3 | 2 | 3 |
| 3 | 1 | 1 | 10 | 0 | 3 | 2 | 1 |
| 1 | 1 | 1 | 4  | 0 | 3 | 2 | 1 |
| 2 | 1 | 1 | 5  | 0 | 3 | 2 | 1 |
| 1 | 1 | 1 | 8  | 0 | 3 | 1 | 1 |
| 3 | 1 | 1 | 24 | 0 | 2 | 2 | 1 |
| 1 | 1 | 1 | 2  | 0 | 3 | 2 | 1 |
| 1 | 1 | 1 | 3  | 0 | 3 | 3 | 1 |
| 3 | 1 | 1 | 41 | 0 | 3 | 2 | 1 |
| 3 | 1 | 1 | 27 | 0 | 3 | 2 | 1 |
| 3 | 1 | 1 | 28 | 0 | 3 | 2 | 1 |
| 1 | 1 | 1 | 1  | 0 | 2 | 3 | 1 |
| 1 | 1 | 1 | 1  | 0 | 2 | 2 | 5 |
| 3 | 1 | 1 | 19 | 0 | 3 | 2 | 1 |
| 3 | 1 | 1 | 29 | 0 | 2 | 2 | 1 |
